# Supplementary material
Source: PubMed Central journal article supplement (PMC2701197)

**Supporting Information  
Experimental**

***Highly Enantioselective Borane Reduction of Heteroaryl and Heterocyclic  
Ketoximes Ethers Catalyzed by Novel Spiroborate Ester derived from Diphenyl  
Valinol: Application to the Synthesis of Nicotine Analogues***

***Kun Huang, Francisco G. Merced, Margarita Ortiz-Marciales,\* Héctor J. Meléndez,  
Wildeliz Correa and Melvin De Jesús***

Department of Chemistry, University of Puerto Rico-Humacao, CUH Station,  
Humacao, Puerto Rico 00791, USA.

[mr\\_ortiz@webmail.uprh.edu](mailto:mr_ortiz@webmail.uprh.edu)

|                                                              | <b>Pag.</b> |
|--------------------------------------------------------------|-------------|
| <b>(S)-3-(1-Ethylpyrrolidin-2-yl) pyridine (3)</b>           |             |
| <sup>1</sup> H-NMR.....                                      | S8          |
| <sup>13</sup> C-NMR.....                                     | S9          |
| GC.....                                                      | S10         |
| <b>(E)-1-(Thiophen-3yl)ethanone oxime (13a)</b>              |             |
| <sup>1</sup> H-NMR.....                                      | S11         |
| <sup>13</sup> C-NMR.....                                     | S12         |
| <b>(E)-1-(2,5-Dimethylthiophen-3-yl)ethanone oxime (13b)</b> |             |
| <sup>1</sup> H-NMR.....                                      | S13         |
| <sup>13</sup> C-NMR.....                                     | S14         |
| <b>(E)-Chroman-4-one oxime (13c)</b>                         |             |
| <sup>1</sup> H-NMR.....                                      | S15         |
| <sup>13</sup> C-NMR.....                                     | S16         |
| <b>(E)-6-Chlorochroman-4-one oxime (13d)</b>                 |             |
| <sup>1</sup> H-NMR.....                                      | S17         |
| <sup>13</sup> C-NMR.....                                     | S18         |

---

|                                                                        |     |
|------------------------------------------------------------------------|-----|
| <b>(E)-Thiochroman-4-one oxime (13e)</b>                               |     |
| <sup>1</sup> H-NMR.....                                                | S19 |
| <sup>13</sup> C-NMR.....                                               | S20 |
| <b>(E)-6-Chlorothiochroman-4-one oxime (13f)</b>                       |     |
| <sup>1</sup> H-NMR.....                                                | S21 |
| <sup>13</sup> C-NMR.....                                               | S22 |
| <b>(E)-1-(pyridine-2-yl)ethanone oxime (14)</b>                        |     |
| <sup>1</sup> H-NMR.....                                                | S23 |
| <sup>13</sup> C-NMR.....                                               | S24 |
| <b>(E)-1-(Pyridine-3-yl)ethanone oxime (14a)</b>                       |     |
| <sup>1</sup> H-NMR.....                                                | S25 |
| <sup>13</sup> C-NMR.....                                               | S26 |
| <b>(E)-1-(Pyridine-3-yl)propan-1-one oxime (14b)</b>                   |     |
| <sup>1</sup> H-NMR.....                                                | S27 |
| <sup>13</sup> C-NMR.....                                               | S28 |
| <b>(E)-1-(6-Methoxypyridin-3-yl)ethanone oxime (14c)</b>               |     |
| <sup>1</sup> H-NMR.....                                                | S29 |
| <sup>13</sup> C-NMR.....                                               | S30 |
| <b>(E)-Cyclopropyl(pyridine-3-yl)methanone oxime (14d<sub>E</sub>)</b> |     |
| <sup>1</sup> H-NMR.....                                                | S31 |
| <sup>13</sup> C-NMR.....                                               | S32 |
| <b>(Z)-Cyclopropyl(pyridine-3-yl)methanone oxime (14d<sub>Z</sub>)</b> |     |
| <sup>1</sup> H-NMR.....                                                | S33 |
| <sup>13</sup> C-NMR.....                                               | S34 |
| <b>(E)-Phenyl(pyridine-3-yl)methanone oxime (14e)</b>                  |     |
| <sup>1</sup> H-NMR.....                                                | S35 |
| <sup>13</sup> C-NMR.....                                               | S36 |
| <b>(E)-1-(Pyridine-4-yl)ethanone oxime (14f)</b>                       |     |
| <sup>1</sup> H-NMR.....                                                | S37 |
| <sup>13</sup> C-NMR.....                                               | S38 |

|                                                                               |     |
|-------------------------------------------------------------------------------|-----|
| <b>(E)-1-(Pyridine-4-yl)propan-1-one oxime (14g)</b>                          |     |
| <sup>1</sup> H-NMR.....                                                       | S39 |
| <sup>13</sup> C-NMR.....                                                      | S40 |
| <b>(E)-Cyclopropyl(pyridine-4-yl)methanone oxime (14h<sub>E</sub>)</b>        |     |
| <sup>1</sup> H-NMR.....                                                       | S41 |
| <sup>13</sup> C-NMR.....                                                      | S42 |
| <b>(Z)-Cyclopropyl(pyridine-4-yl)methanone oxime (14h<sub>Z</sub>)</b>        |     |
| <sup>1</sup> H-NMR.....                                                       | S43 |
| <sup>13</sup> C-NMR.....                                                      | S44 |
| <b>(E)-1-(Pyridine-3-yl)-4-(triisopropylsilyloxy)-butan-1-one oxime (14i)</b> |     |
| <sup>1</sup> H-NMR.....                                                       | S45 |
| <sup>13</sup> C-NMR.....                                                      | S46 |
| <b>(E)-1-(Thiophen-3-yl)ethanone O-benzyloxime (15a)</b>                      |     |
| <sup>1</sup> H-NMR.....                                                       | S47 |
| <sup>13</sup> C-NMR.....                                                      | S48 |
| <b>(E)-1-(2,5-Dimethylthiophen-3-yl)ethanone O-benzyl oxime (15b)</b>         |     |
| <sup>1</sup> H-NMR.....                                                       | S49 |
| <sup>13</sup> C-NMR.....                                                      | S50 |
| <b>(E)-Chroman-4-one O-benzyl-oxime (15c)</b>                                 |     |
| <sup>1</sup> H-NMR.....                                                       | S51 |
| <sup>13</sup> C-NMR.....                                                      | S52 |
| <b>(E)-6-Chlorochroman-4-one O-benzyl oxime (15d)</b>                         |     |
| <sup>1</sup> H-NMR.....                                                       | S53 |
| <sup>13</sup> C-NMR.....                                                      | S54 |
| <b>(E)-Thiochroman-4-one O-benzyl oxime (15e)</b>                             |     |
| <sup>1</sup> H-NMR.....                                                       | S55 |
| <sup>13</sup> C-NMR.....                                                      | S56 |
| <b>(E)-6-Chlorothiochroman-4-one O-benzyl oxime (15f)</b>                     |     |
| <sup>1</sup> H-NMR.....                                                       | S57 |
| <sup>13</sup> C-NMR.....                                                      | S58 |

|                                                                                    |     |
|------------------------------------------------------------------------------------|-----|
| <b>(E)-1-(Pyridine-3-yl)ethanone O-benzyl oxime (16a)</b>                          |     |
| <sup>1</sup> H-NMR.....                                                            | S59 |
| <sup>13</sup> C-NMR.....                                                           | S60 |
| <b>(E)-1-(Pyridine-3-yl)propan-1-one O-benzyloxime (16b)</b>                       |     |
| <sup>1</sup> H-NMR.....                                                            | S61 |
| <sup>13</sup> C-NMR.....                                                           | S62 |
| <b>(E)-1-(6-Methoxypyridin-3-yl)ethanone O-benzyloxime (16c)</b>                   |     |
| <sup>1</sup> H-NMR.....                                                            | S63 |
| <sup>13</sup> C-NMR.. ..                                                           | S64 |
| <b>(E)-Cyclopropyl(pyridine-3-yl)methanone O-benzyloxime (16d)</b>                 |     |
| <sup>1</sup> H-NMR.....                                                            | S65 |
| <sup>13</sup> C-NMR.. ..                                                           | S66 |
| <b>(E)-Phenyl(pyridine-3-yl)methanone O-benzyl oxime (17)</b>                      |     |
| <sup>1</sup> H-NMR.....                                                            | S67 |
| <sup>13</sup> C-NMR.....                                                           | S68 |
| <b>(E)-1-(Pyridine-4-yl)ethanone O-benzyl oxime (18a)</b>                          |     |
| <sup>1</sup> H-NMR.....                                                            | S69 |
| <sup>13</sup> C-NMR.....                                                           | S70 |
| <b>(E)-1-(Pyridine-4-yl)propan-1-one O-benzyl oxime (18b)</b>                      |     |
| <sup>1</sup> H-NMR.....                                                            | S71 |
| <sup>13</sup> C-NMR.....                                                           | S72 |
| <b>(E)-Cyclopropyl(pyridine-4-yl)methanone O-benzyloxime (18c<sub>E</sub>)</b>     |     |
| <sup>1</sup> H-NMR.....                                                            | S73 |
| <sup>13</sup> C-NMR.....                                                           | S74 |
| <b>(Z)-Cyclopropyl(pyridine-4-yl)methanone O-benzyloxime (18c<sub>Z</sub>)</b>     |     |
| <sup>1</sup> H-NMR.....                                                            | S75 |
| <sup>13</sup> C-NMR.....                                                           | S76 |
| <b>(E)-1-(pyridine-3yl)-4-(triisopropylsilyloxy)butan-1-one O-benzyloxime (19)</b> |     |
| <sup>1</sup> H-NMR.....                                                            | S77 |
| <sup>13</sup> C-NMR.....                                                           | S78 |

|                                                              |      |
|--------------------------------------------------------------|------|
| <b>N-(1-(Thiophen-3-yl) ethyl)acetamide (20a)</b>            |      |
| <sup>1</sup> H-NMR.....                                      | S79  |
| <sup>13</sup> C-NMR.....                                     | S80  |
| GC.....                                                      | S81  |
| <b>N-(1-(2,5-Dimethylthiophen-3-yl)ethyl)acetamide (20b)</b> |      |
| <sup>1</sup> H-NMR.....                                      | S82  |
| <sup>13</sup> C-NMR.....                                     | S83  |
| GC.....                                                      | S84  |
| <b>N-(Chroman-4-yl)acetamide (20c)</b>                       |      |
| GC.....                                                      | S85  |
| <b>N-(6-Chlorochroman-4-yl)acetamide (20d)</b>               |      |
| <sup>1</sup> H-NMR.....                                      | S86  |
| <sup>13</sup> C-NMR.....                                     | S87  |
| GC.....                                                      | S88  |
| <b>N-(Thiochroman-4-yl)acetamide (20e)</b>                   |      |
| <sup>1</sup> H-NMR.....                                      | S89  |
| <sup>13</sup> C-NMR.....                                     | S90  |
| GC.....                                                      | S91  |
| <b>N-(6-Chlorothiochroman-4-yl)acetamide (20f)</b>           |      |
| <sup>1</sup> H-NMR.....                                      | S92  |
| <sup>13</sup> C-NMR.....                                     | S93  |
| GC.....                                                      | S94  |
| <b>N-(1-(Pyridine-3-yl) ethyl)acetamide (22a)</b>            |      |
| <sup>1</sup> H-NMR.....                                      | S95  |
| <sup>13</sup> C-NMR.....                                     | S96  |
| GC.....                                                      | S97  |
| <b>N-(1-(Pyridine-4-yl) ethyl)acetamide (24a)</b>            |      |
| <sup>1</sup> H-NMR.....                                      | S98  |
| <sup>13</sup> C-NMR.....                                     | S99  |
| GC.....                                                      | S100 |

|                                                              |      |
|--------------------------------------------------------------|------|
| <b>(E)-1-(Pyridine-2-yl)ethanone O-benzyl oxime (25)</b>     |      |
| <sup>1</sup> H-NMR.....                                      | S101 |
| <sup>13</sup> C-NMR.....                                     | S102 |
| <b>N-(1-(Pyridine-2-yl) ethyl)acetamide (27)</b>             |      |
| <sup>1</sup> H-NMR.....                                      | S103 |
| <sup>13</sup> C-NMR.....                                     | S104 |
| GC.....                                                      | S105 |
| <b>N-(1-(Pyridine-3-yl)-propyl)acetamide (28)</b>            |      |
| <sup>1</sup> H-NMR.....                                      | S106 |
| <sup>13</sup> C-NMR.....                                     | S107 |
| GC.....                                                      | S108 |
| <b>(S)-N-(1-(6-methoxypyridine-3-yl)ethyl)acetamide (29)</b> |      |
| <sup>1</sup> H-NMR.....                                      | S109 |
| <sup>13</sup> C-NMR.....                                     | S110 |
| GC.....                                                      | S111 |
| <b>N-Cyclopropyl-(pyridine-3-yl)-methyl)-acetamide (30)</b>  |      |
| <sup>1</sup> H-NMR.....                                      | S112 |
| <sup>13</sup> C-NMR.....                                     | S113 |
| GC.....                                                      | S114 |
| <b>(S)-N-(phenyl(pyridin-3-yl)methyl)acetamide</b>           |      |
| <sup>1</sup> H-NMR.....                                      | S115 |
| <b>(S)-phenyl(pyridin-3-yl)methanamine (31)</b>              |      |
| <sup>1</sup> H-NMR.....                                      | S116 |
| <sup>13</sup> C-NMR.....                                     | S117 |
| HPLC.....                                                    | S118 |
| <b>N-1-(Pyridine-4-yl)-propyl)-acetamide (32)</b>            |      |
| <sup>1</sup> H-NMR.....                                      | S119 |
| <sup>13</sup> C-NMR.....                                     | S120 |
| GC.....                                                      | S121 |

|                                                                          |      |
|--------------------------------------------------------------------------|------|
| <b>N-Cyclopropyl-(pyridine-4-yl)-methyl)-acetamide (33)</b>              |      |
| <sup>1</sup> H-NMR.....                                                  | S122 |
| <sup>13</sup> C-NMR.....                                                 | S123 |
| GC.....                                                                  | S124 |
| <b>1-(pyridine-3yl)-4-(triisopropylsilyloxy)butan-1-one</b>              |      |
| <sup>1</sup> H-NMR.....                                                  | S125 |
| <sup>13</sup> C-NMR.....                                                 | S126 |
| <b>N-(1-(Pyridine-3-yl)-4-(triisopropylsilyloxy)butyl)acetamide (34)</b> |      |
| <sup>1</sup> H-NMR.....                                                  | S127 |
| <sup>13</sup> C-NMR.....                                                 | S128 |
| HPLC.....                                                                | S129 |
| <b>(S)-4-amino-4-(pyridin-3-yl)butan-1-ol (36)</b>                       |      |
| <sup>1</sup> H-NMR.....                                                  | S130 |
| <sup>13</sup> C-NMR.....                                                 | S131 |
| <b>(S)-N-(4-hydroxy-1-(pyridin-3-yl)butyl)acetamide (37)</b>             |      |
| <sup>1</sup> H-NMR.....                                                  | S132 |
| <sup>13</sup> C-NMR.....                                                 | S133 |
| <b>(S)-4-(N-Ethylamino)-4-(pyridin-3-yl)butan-1-ol (38)</b>              |      |
| <sup>1</sup> H-NMR.....                                                  | S134 |
| <sup>13</sup> C-NMR.....                                                 | S135 |
| <b>(S)-1-(3-pyridyl)ethylamine (21a)</b>                                 |      |
| <sup>1</sup> H-NMR.....                                                  | S136 |
| <sup>13</sup> C-NMR.....                                                 | S137 |
| <b>(S)-1-(4-pyridyl)ethylamine (23a)</b>                                 |      |
| <sup>1</sup> H-NMR.....                                                  | S138 |
| <sup>13</sup> C-NMR.....                                                 | S139 |

# (S)-3-(1-Ethylpyrrolidin-2-yl) pyridine (3)

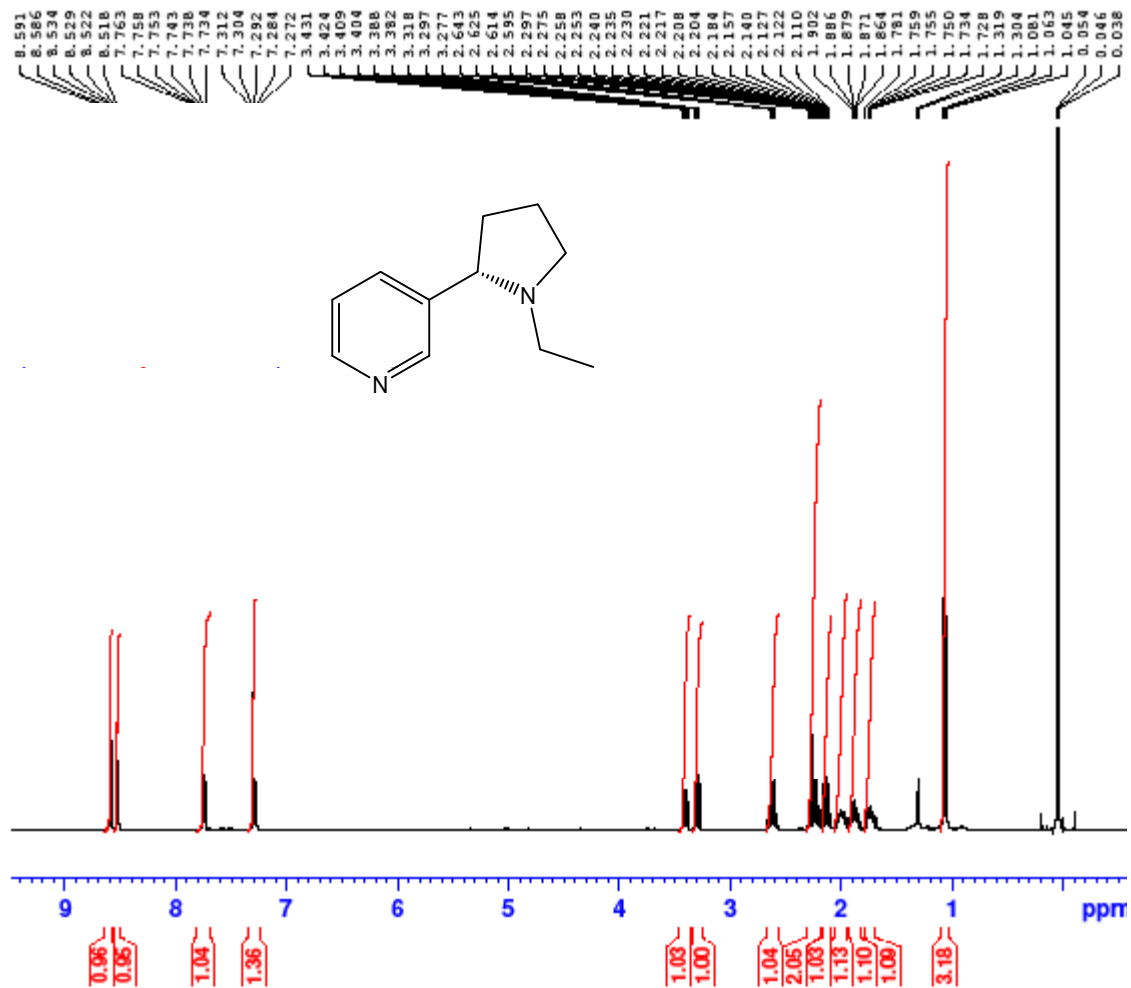



### (S)-3-(1-Ethylpyrrolidin-2-yl) pyridine (3)

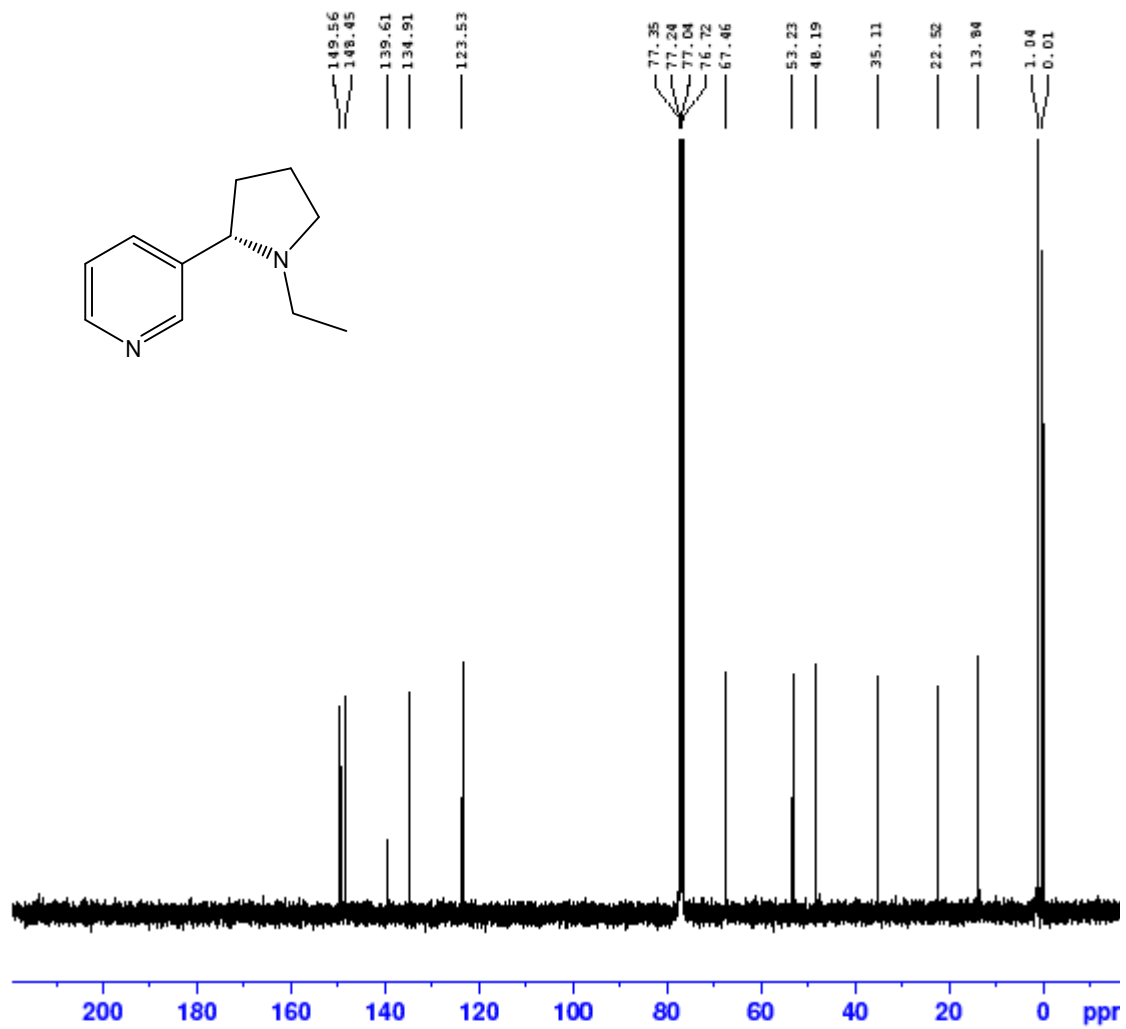

## (S)-3-(1-Ethylpyrrolidin-2-yl) pyridine (3)

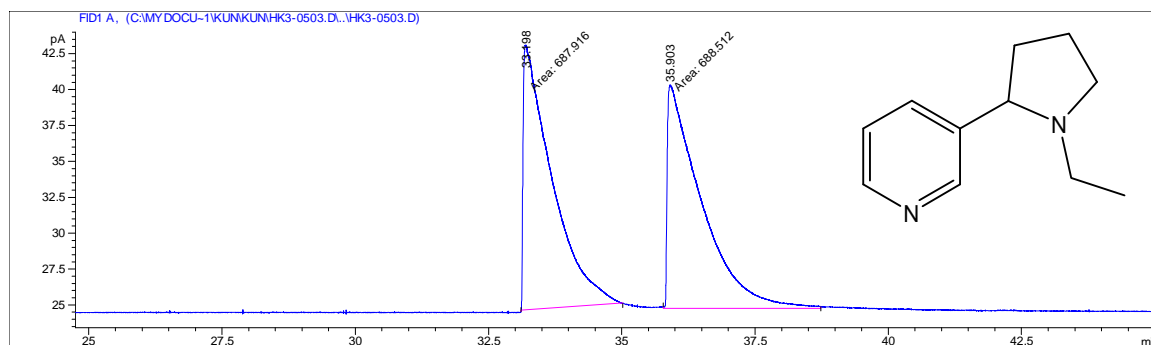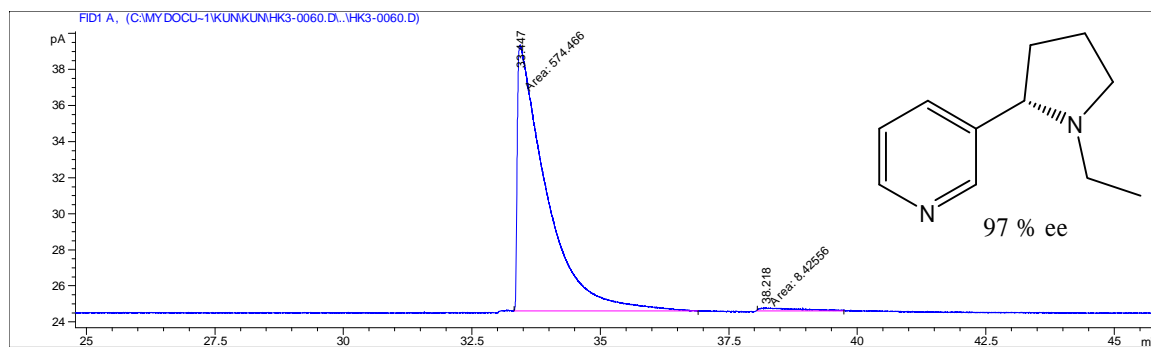

**(E)-1-(Thiophen-3yl)ethanone oxime (13a)**

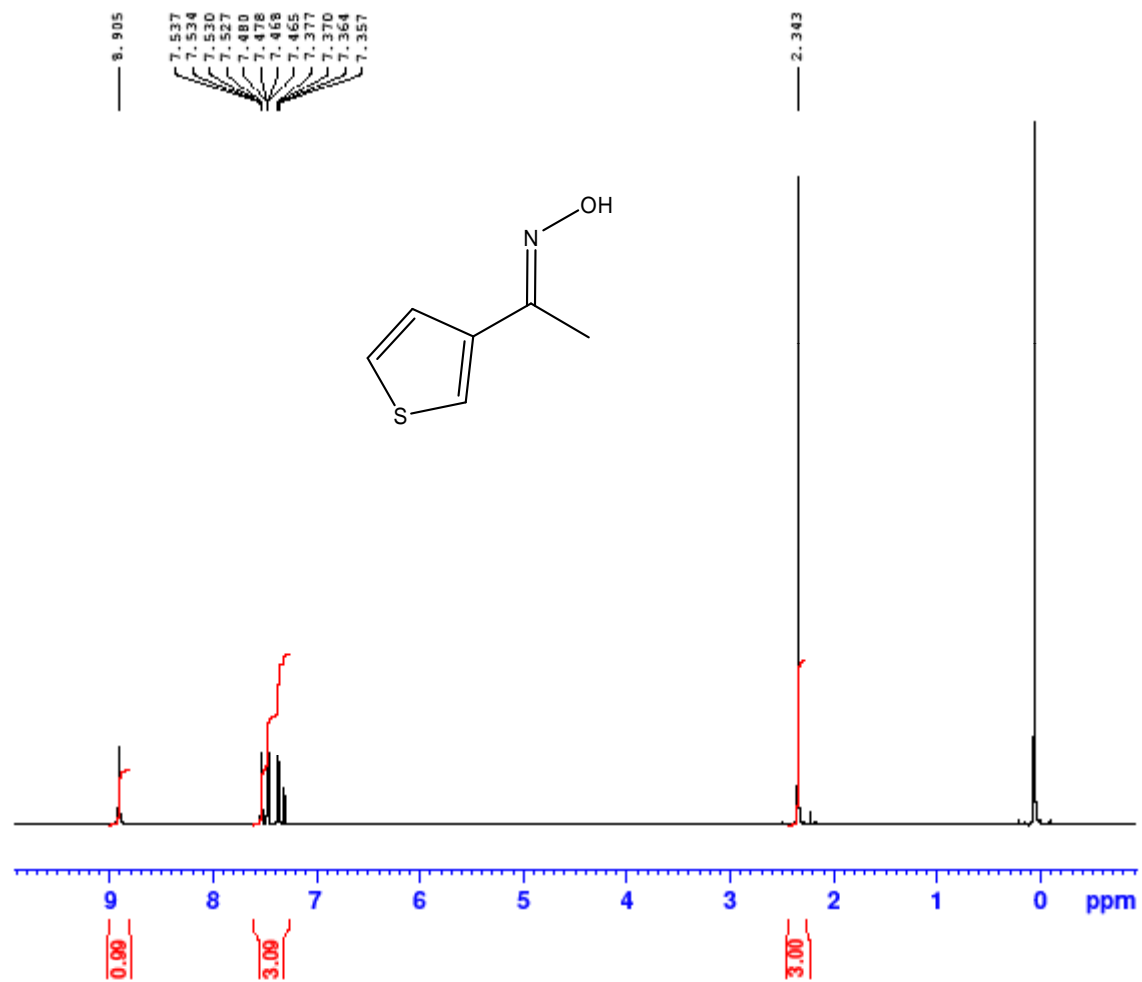

**(E)-1-(Thiophen-3yl)ethanone oxime (13a)**

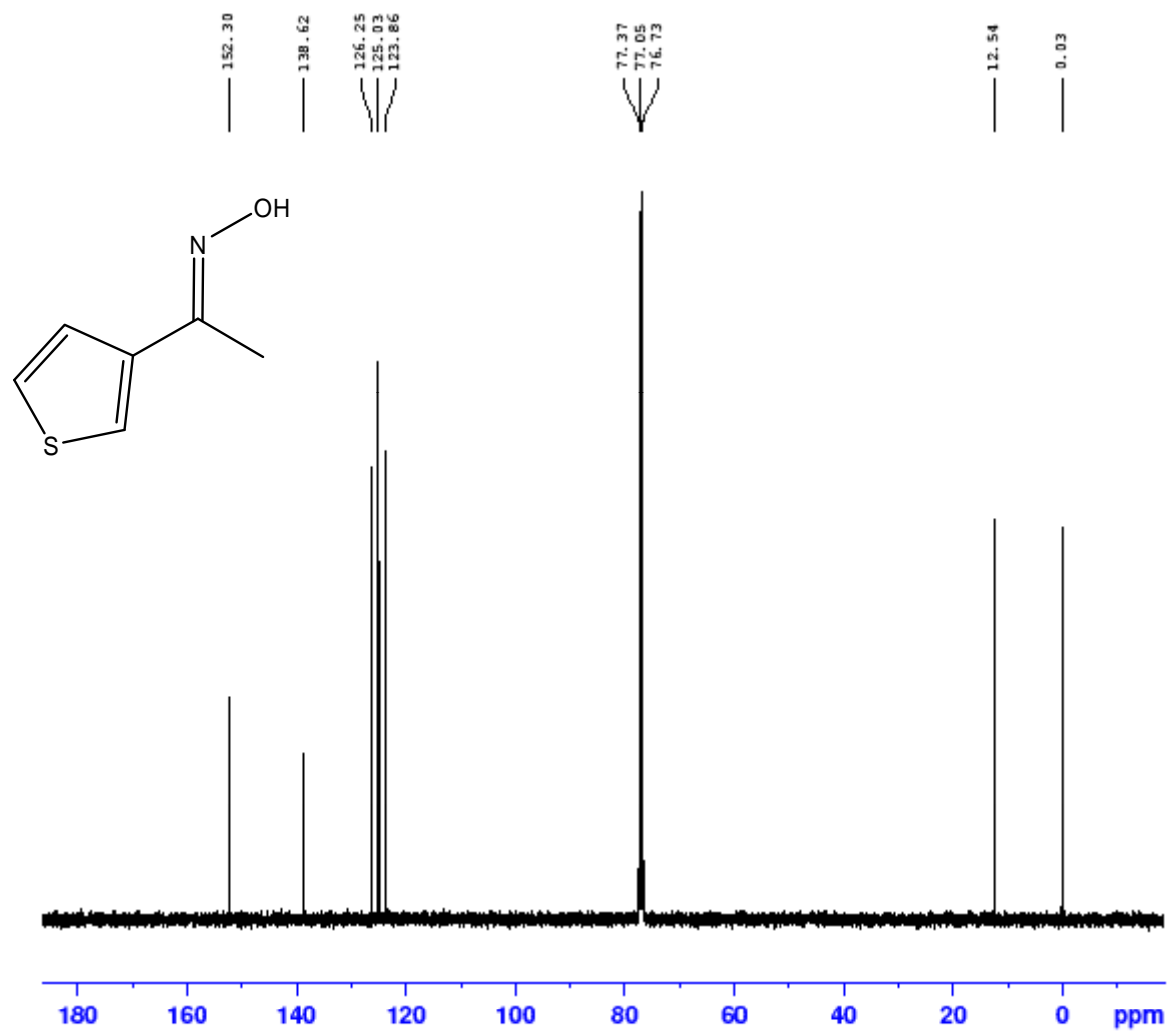

**(E)-1-(2,5-dimethylthiophen-3-yl)ethanone oxime (13b)**

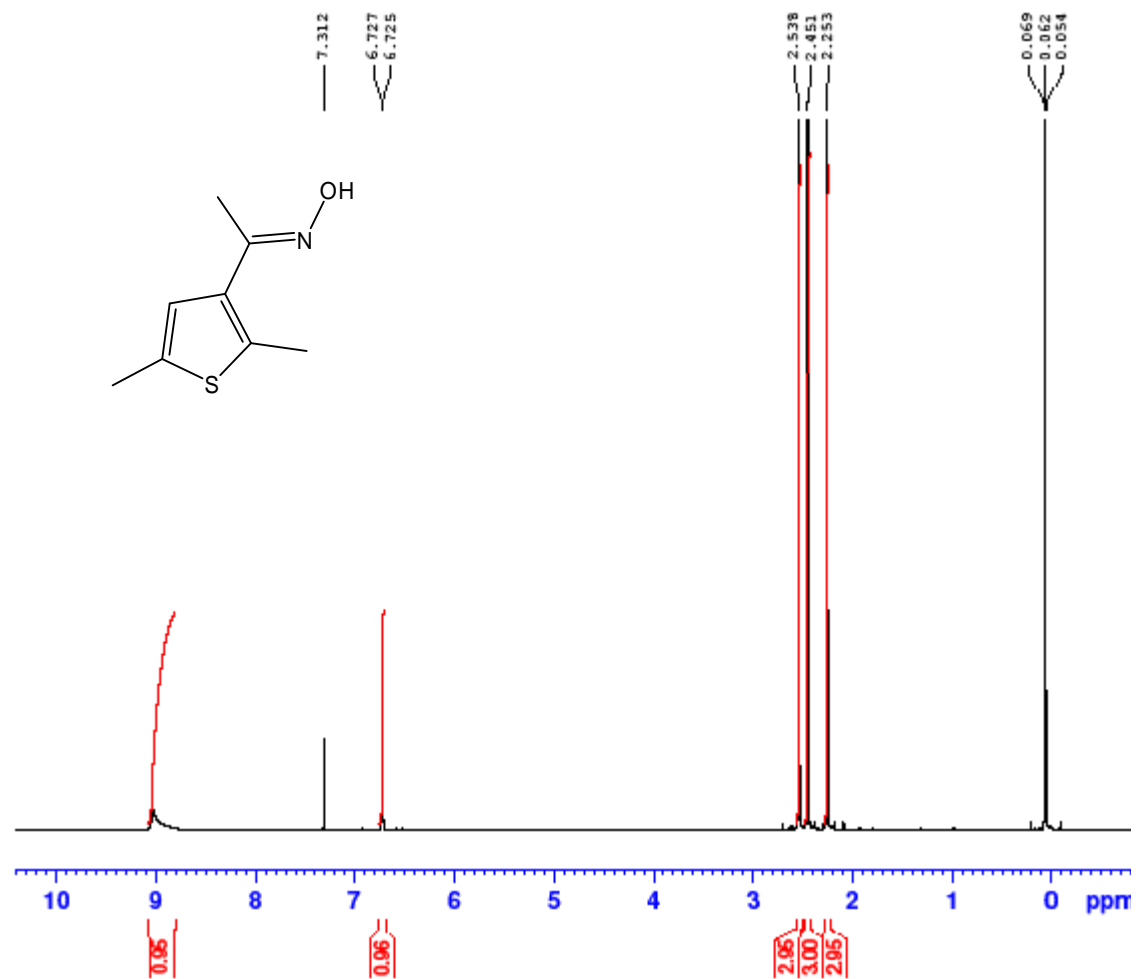

**(E)-1-(2,5-dimethylthiophen-3-yl)ethanone oxime (13b)**

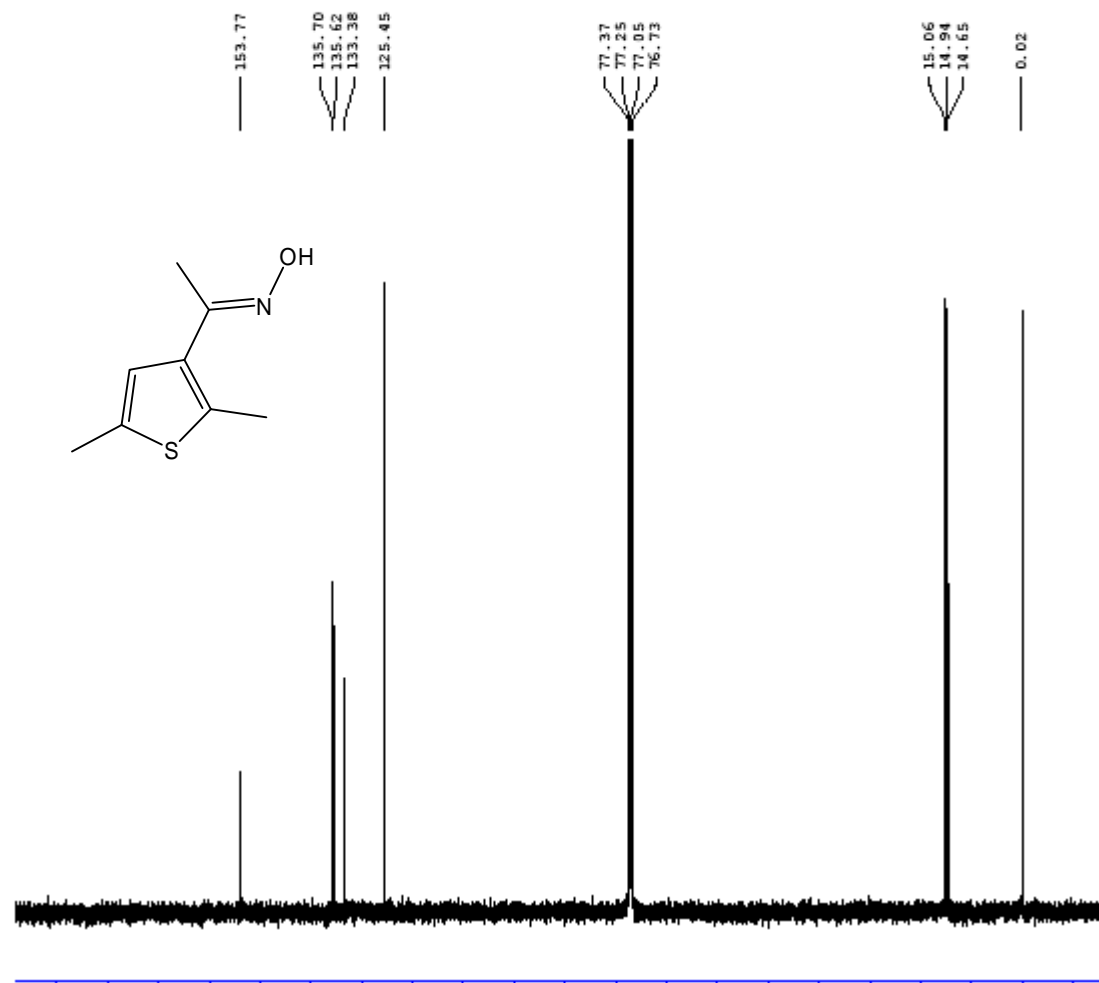

# (E)-6-Chroman-4-one oxime (13c)

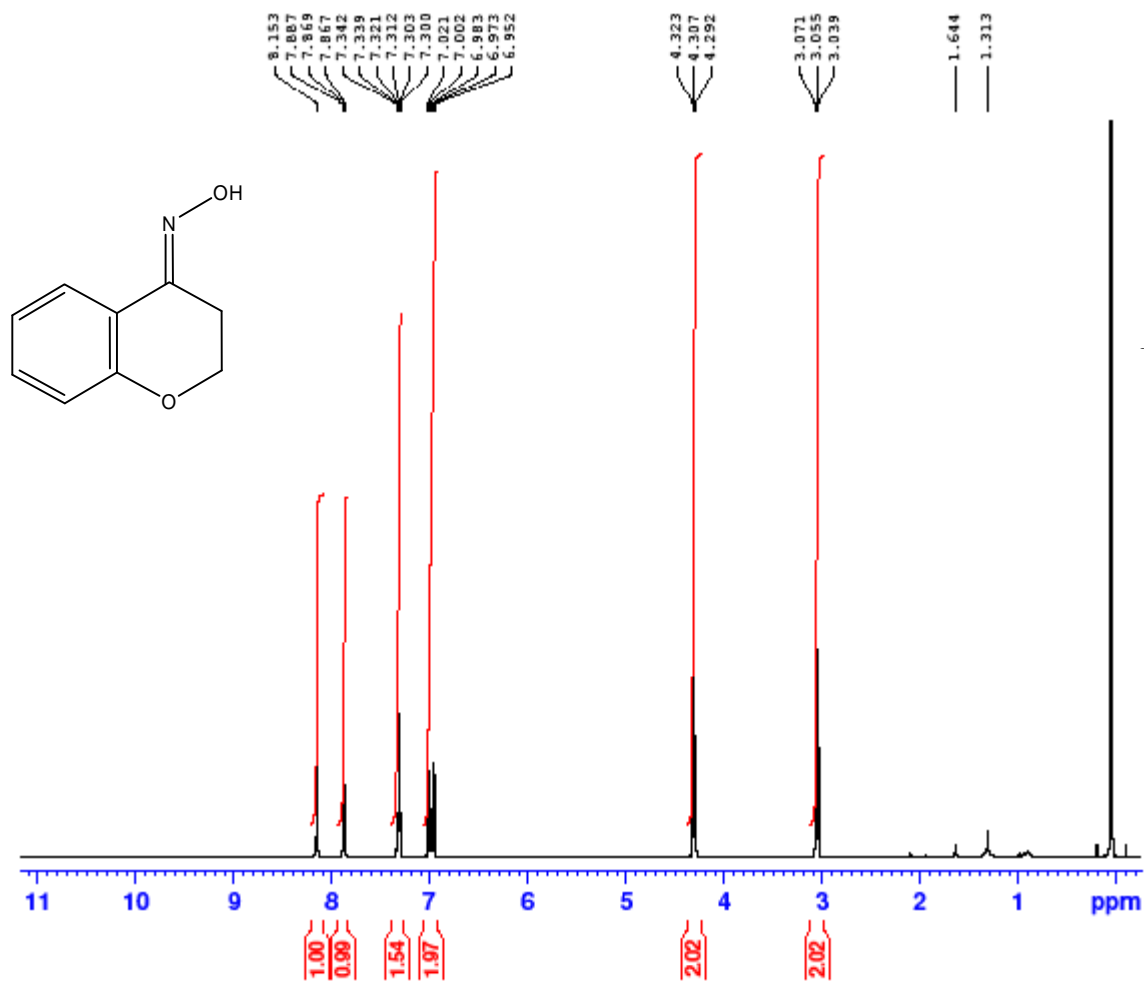

**(E)-6-Chroman-4-one oxime (13c)**

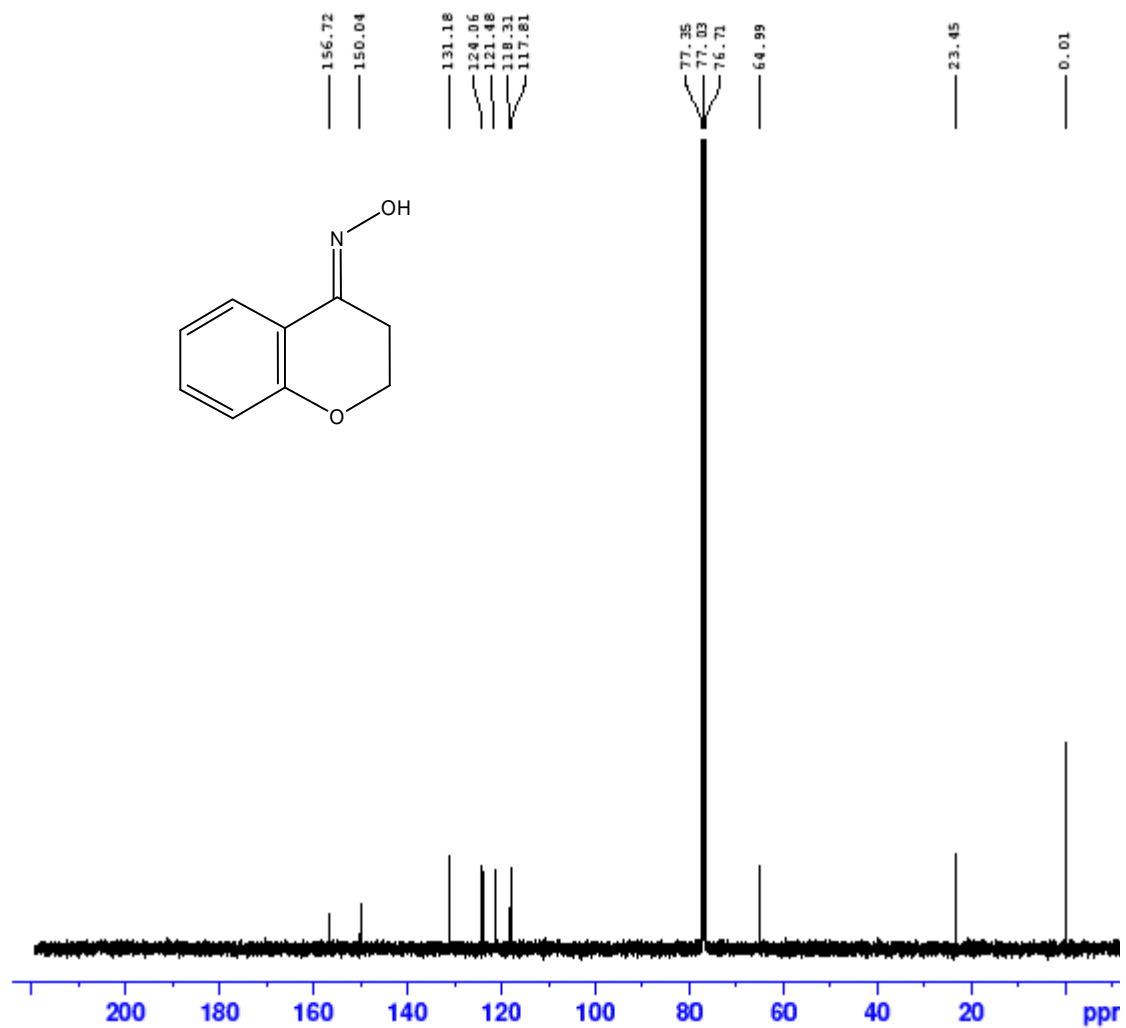



# (E)-6-Chlorochroman-4-one oxime (13d)

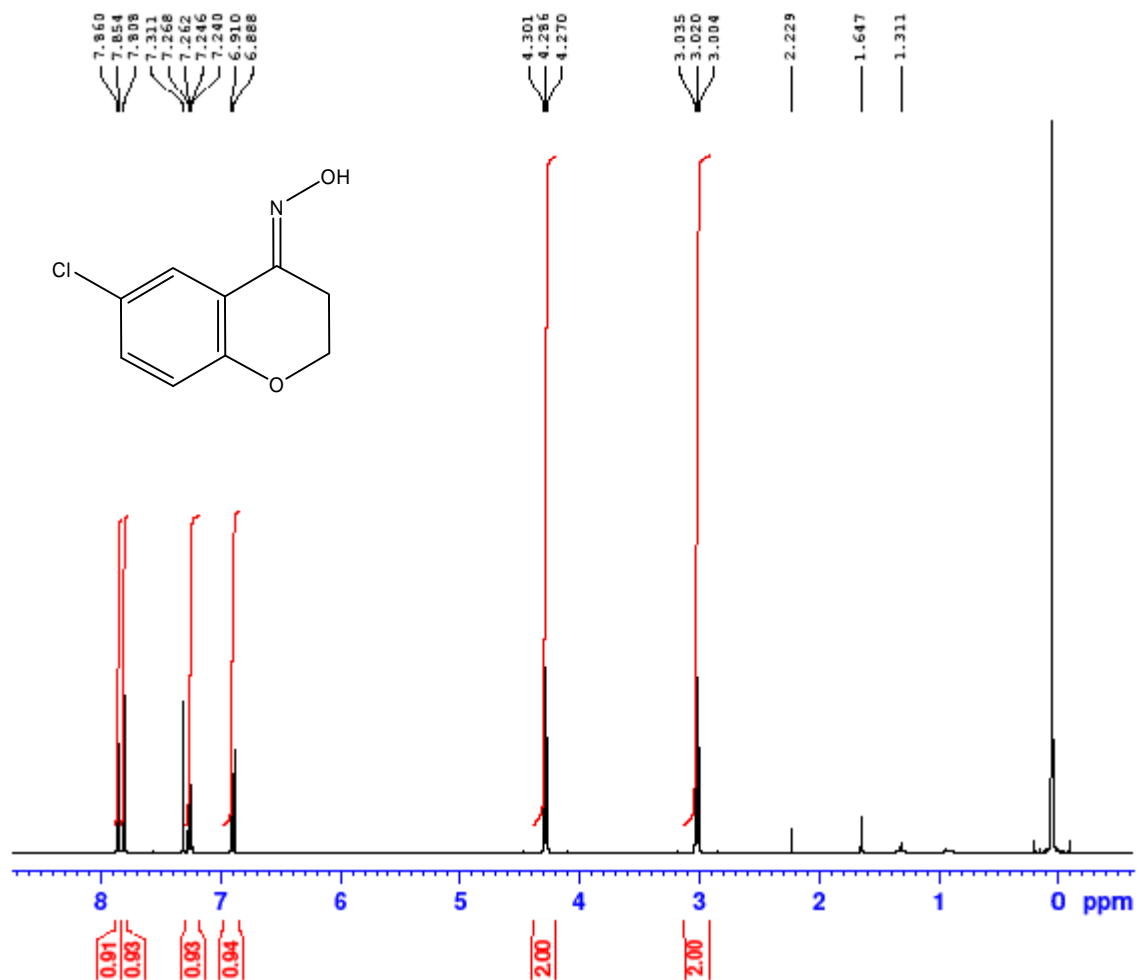

# (E)-6-Chlorochroman-4-one oxime (13d)

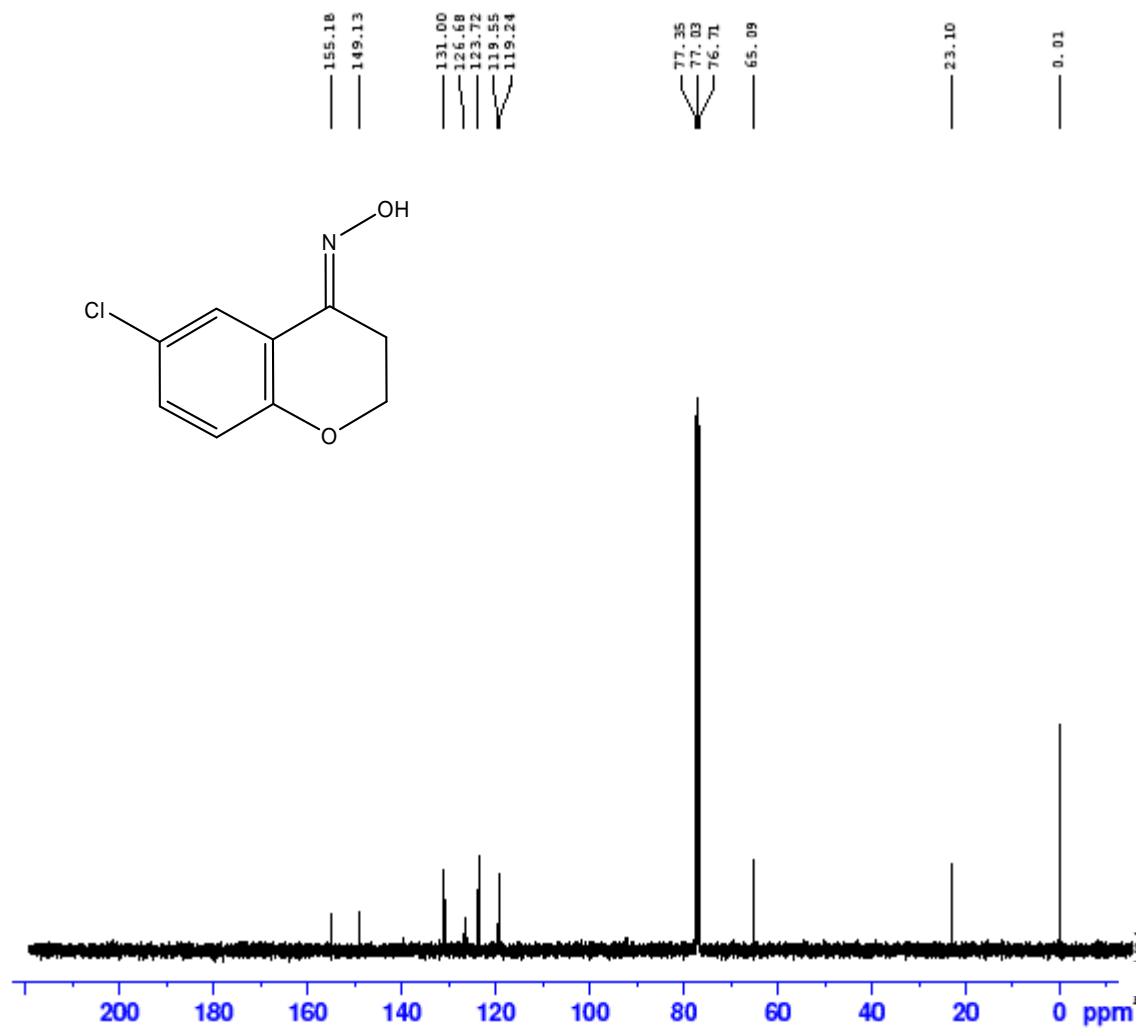

# (E)-Thiochroman-4-one oxime (13e)

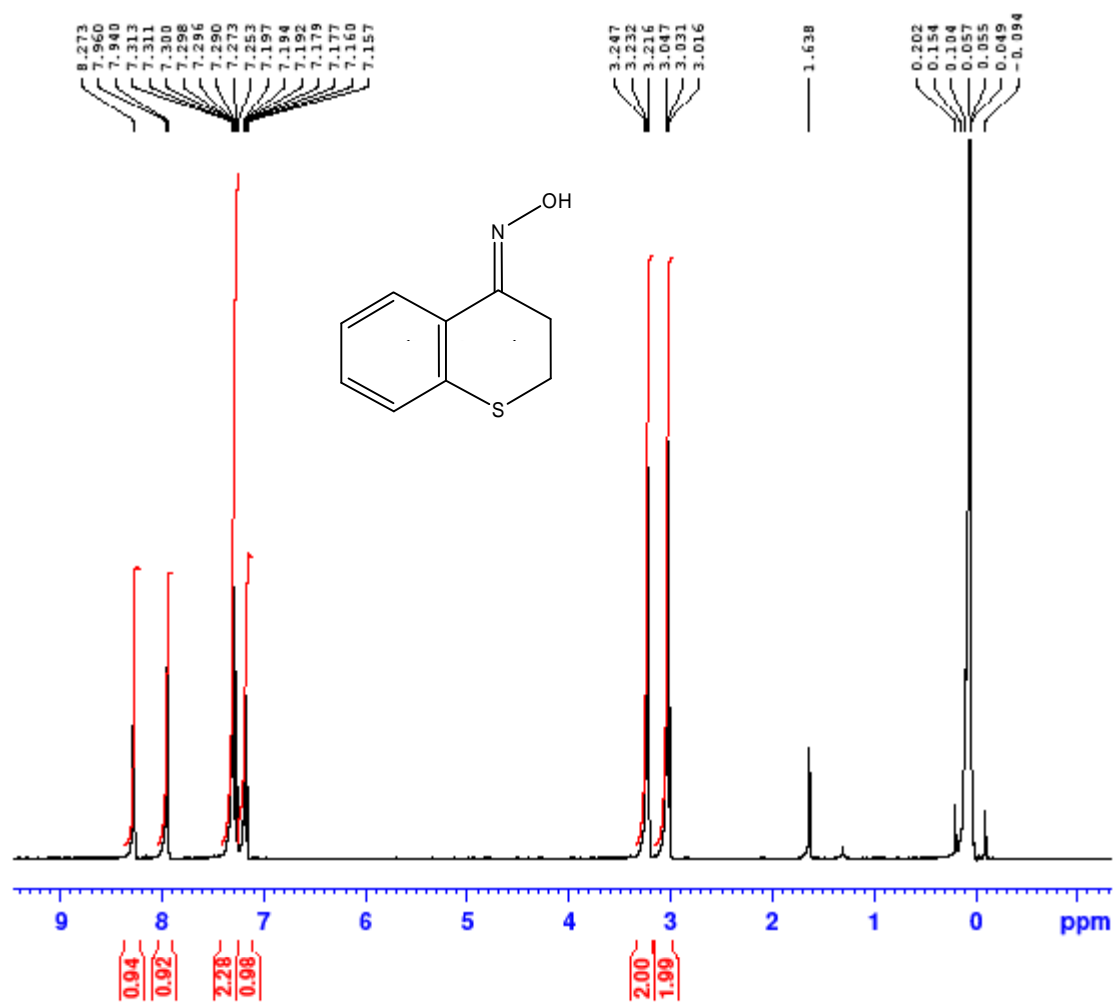

# (E)-Thiochroman-4-one oxime (13e)

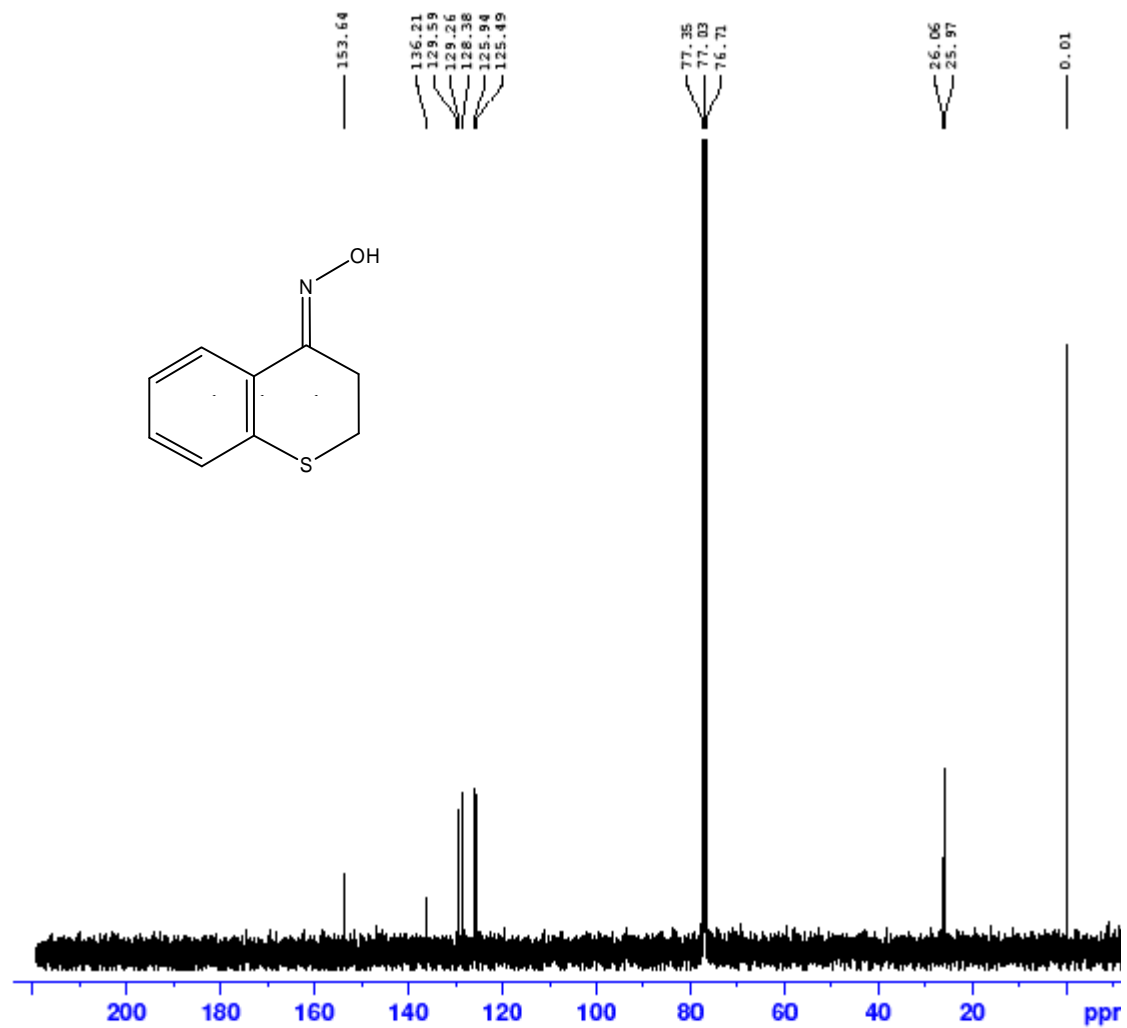

**(E)-6-Chlorothiochroman-4-one oxime (13f)**

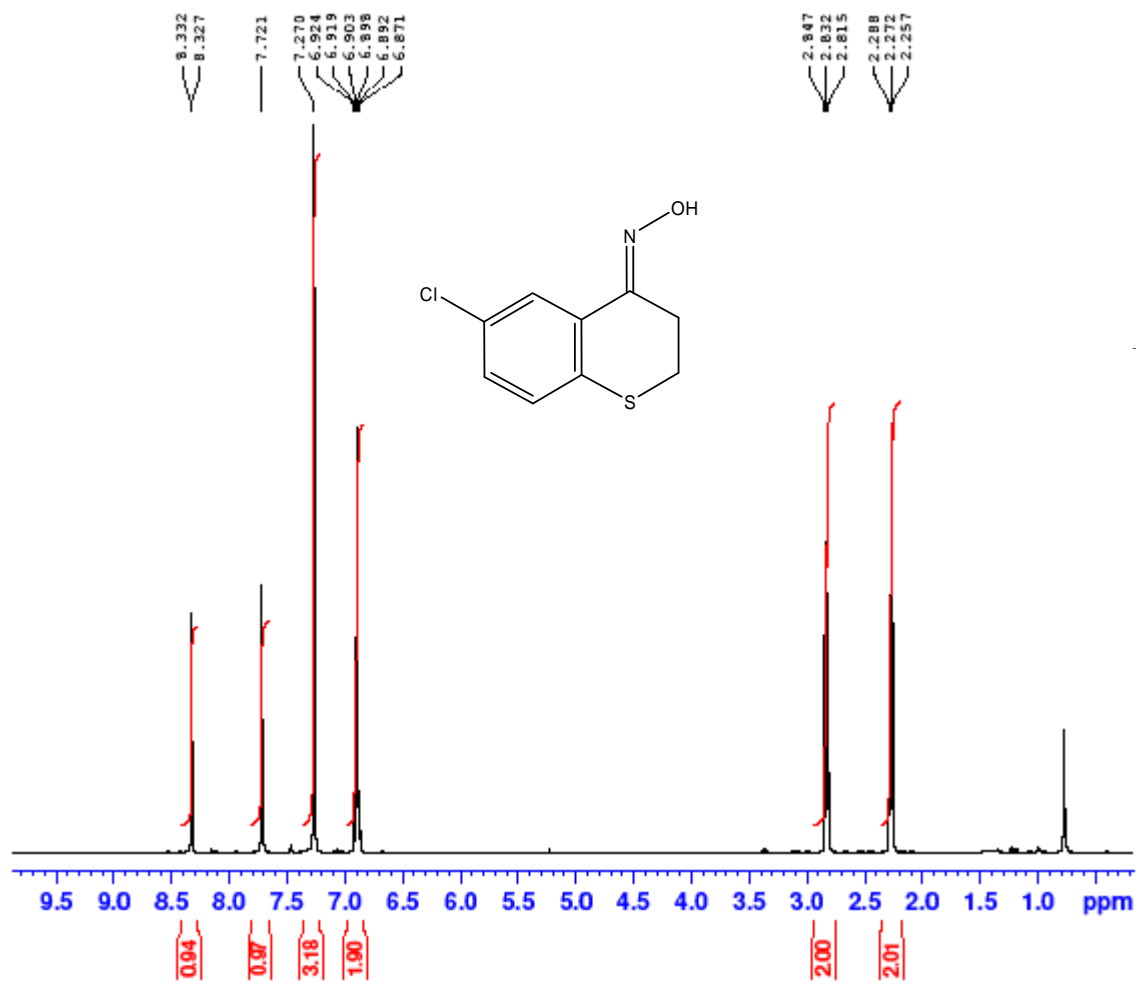

**(E)-6-Chlorothiochroman-4-one oxime (13f)**

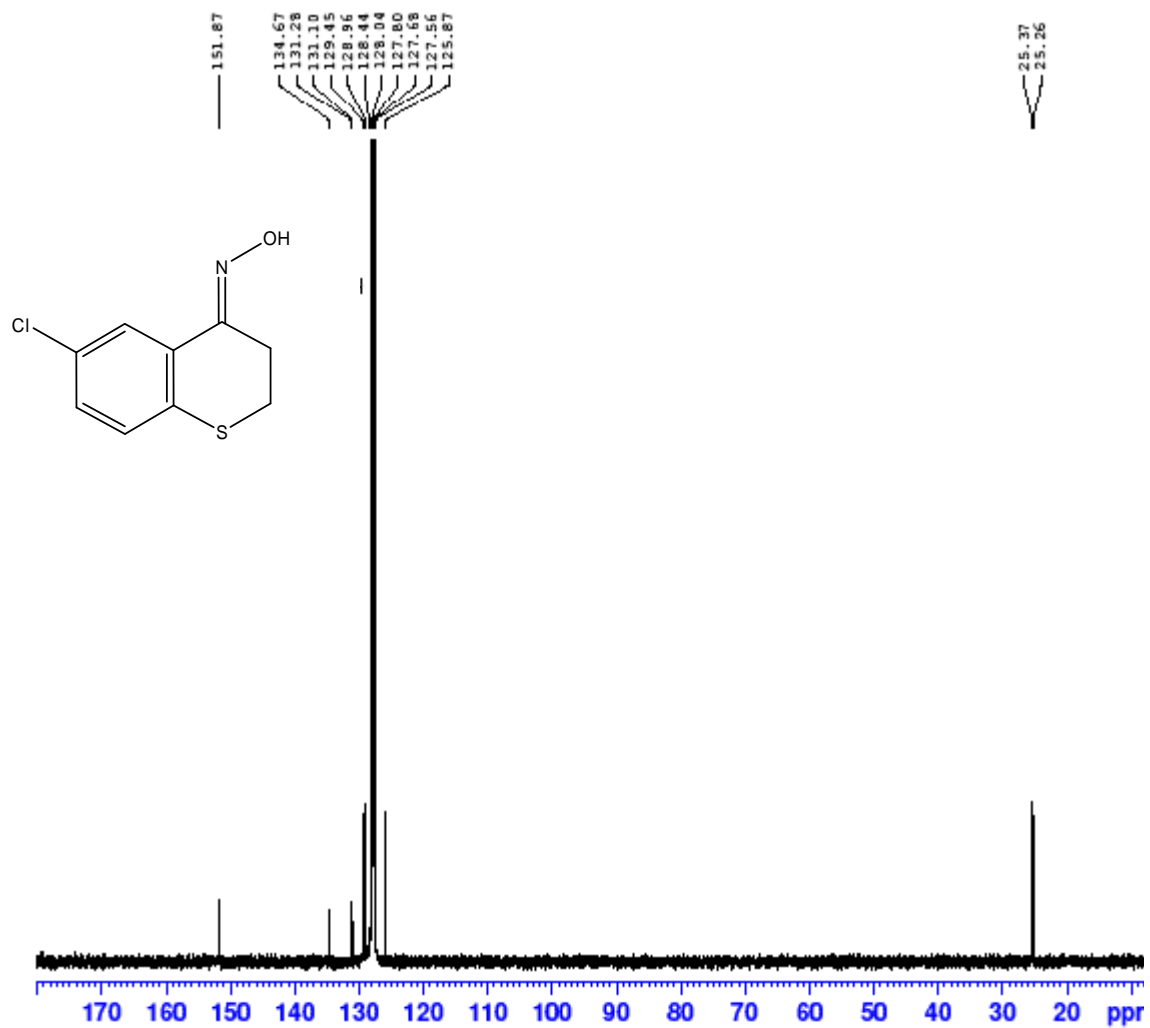

# 1-(pyridin-2-yl)ethanone oxime (14)

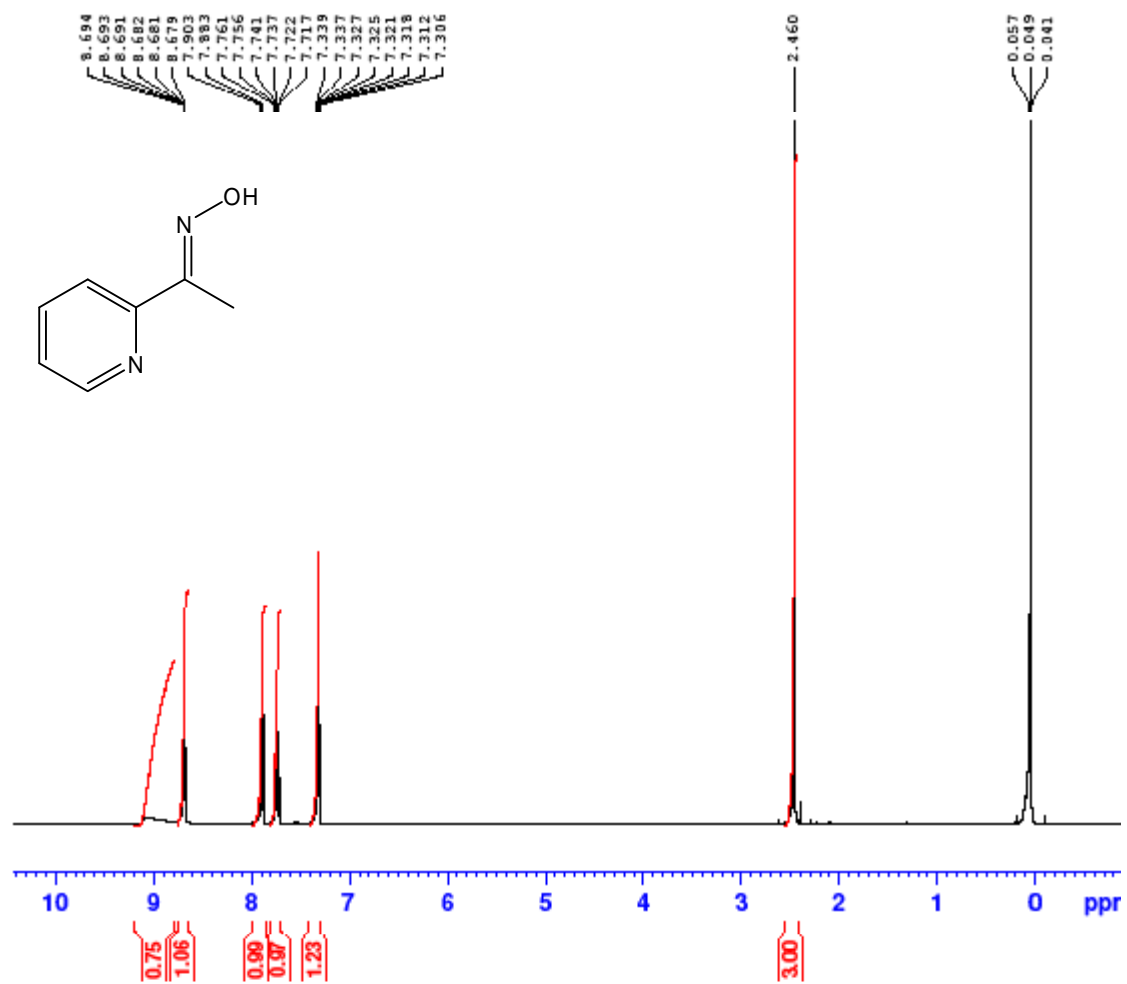

# 1-(pyridin-2-yl)ethanone oxime (14)

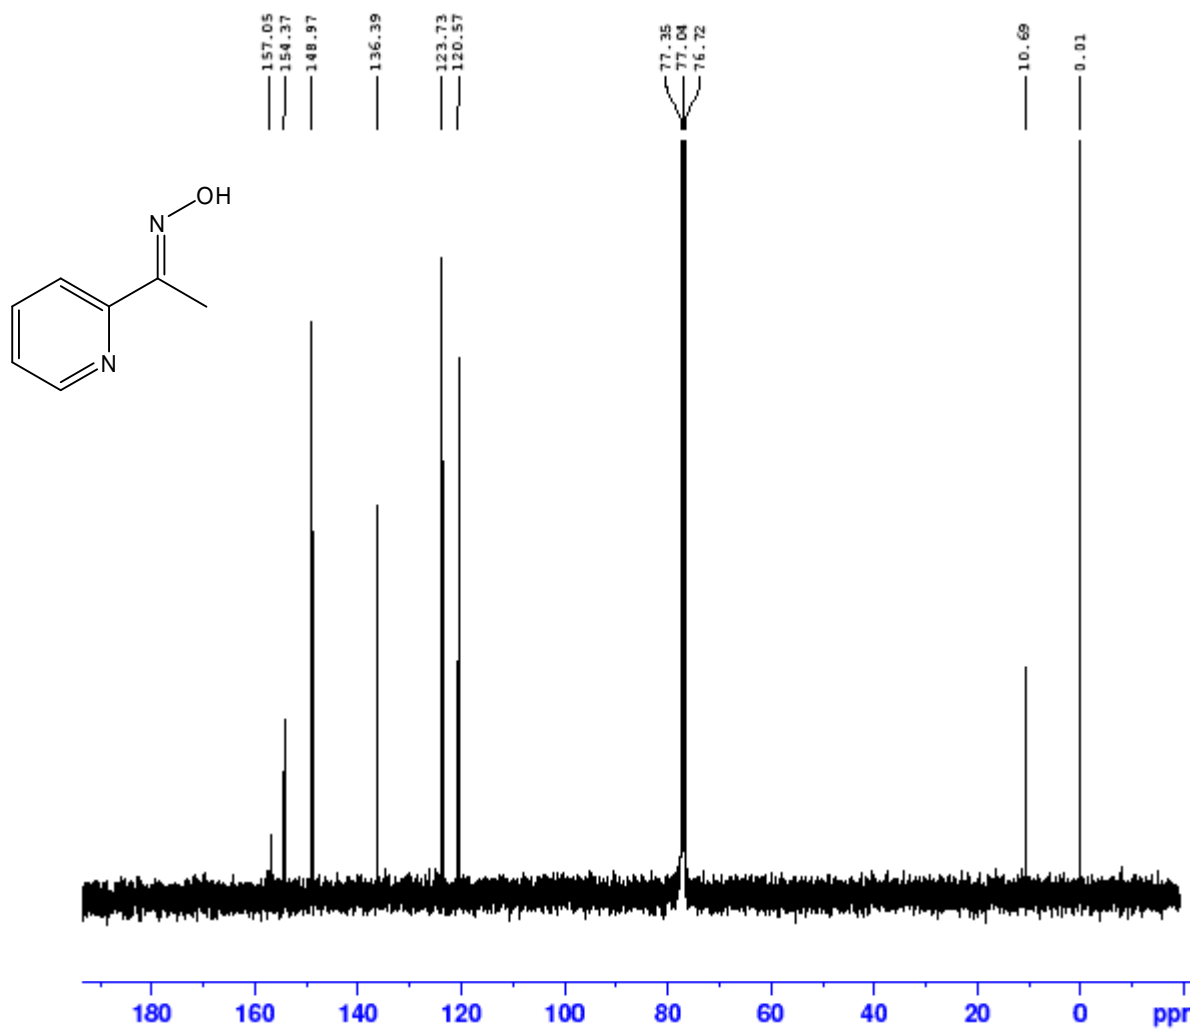



# 1-(pyridin-3-yl)ethanone oxime (14a)

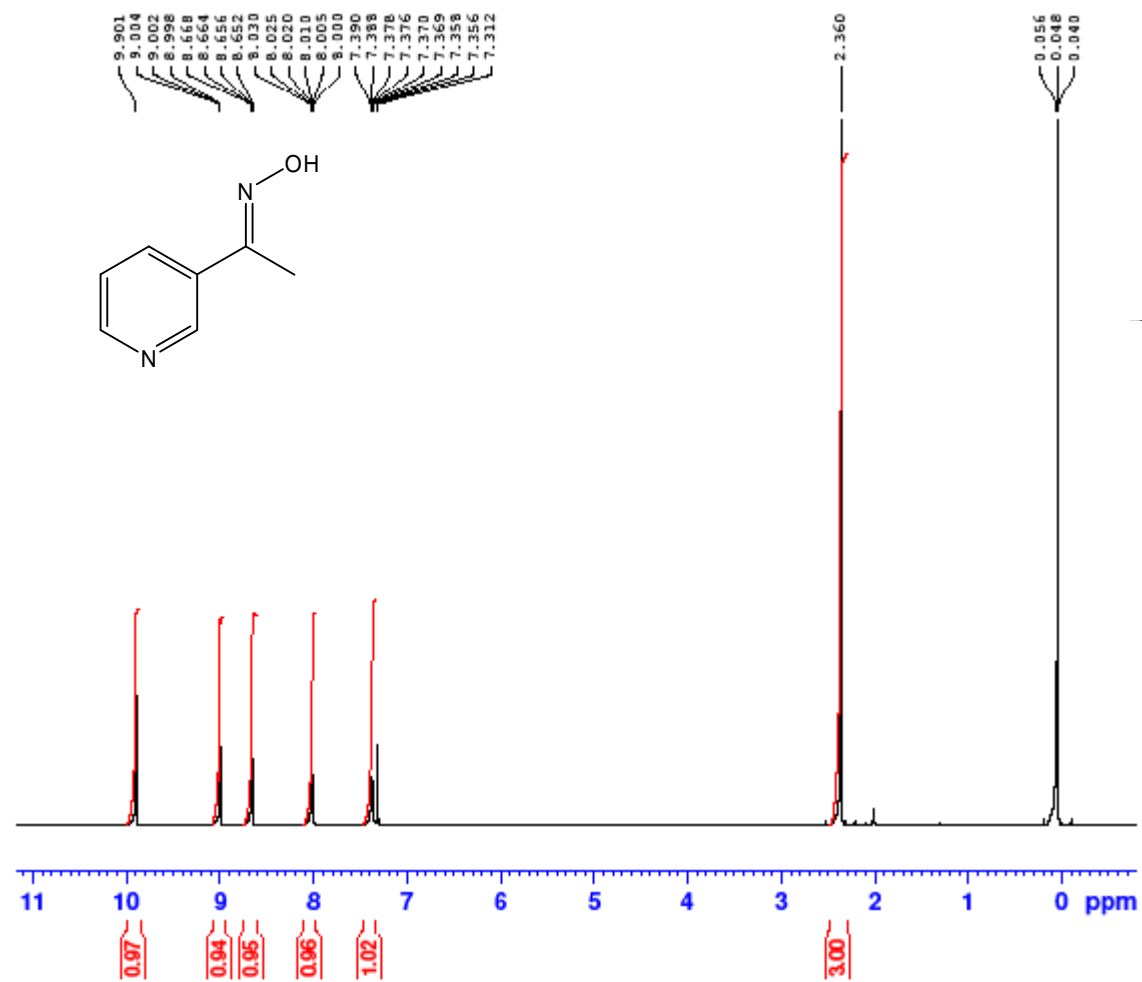

# 1-(pyridin-3-yl)ethanone oxime (14a)

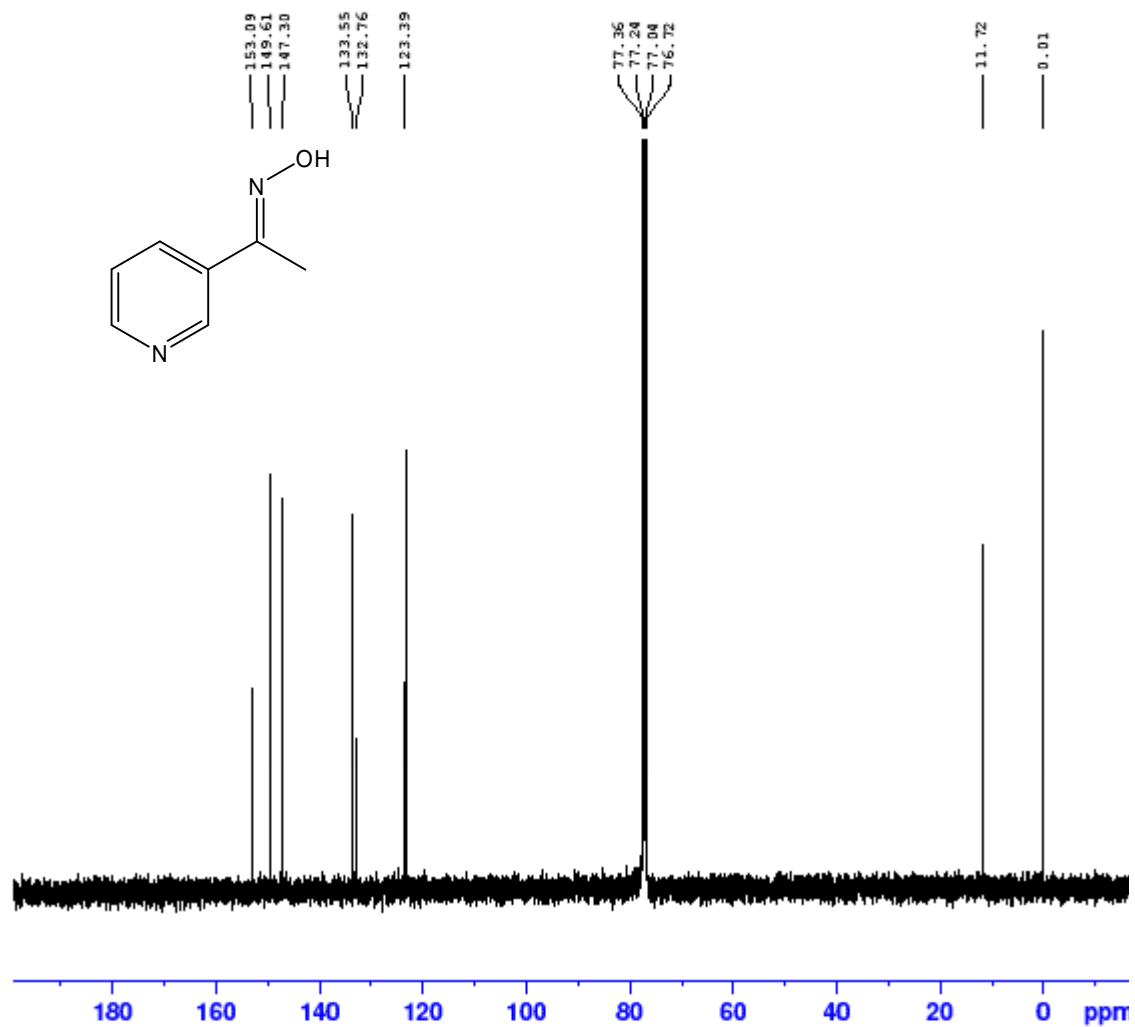

# 1-(pyridin-3-yl)propan-1-one oxime (14b)

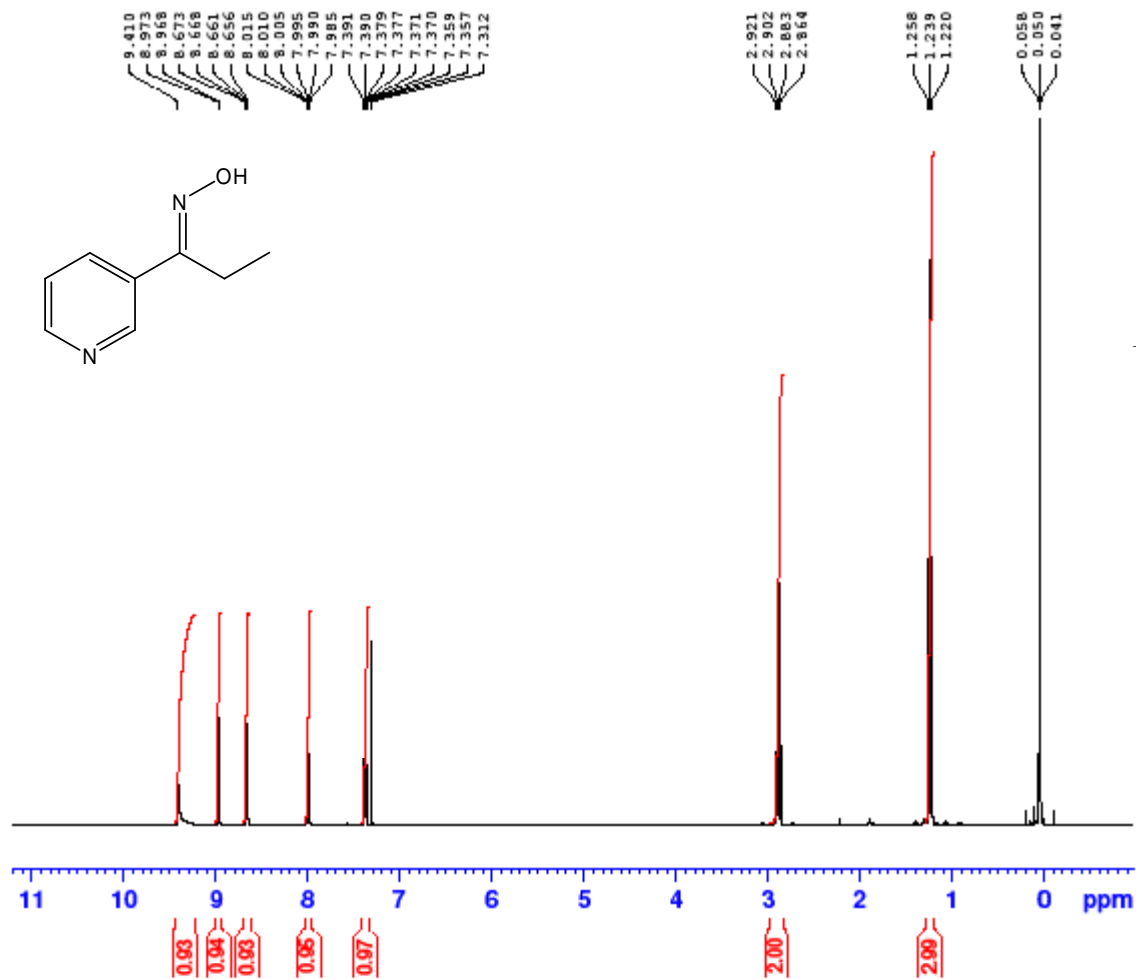

# 1-(pyridin-3-yl)propan-1-one oxime (14b)

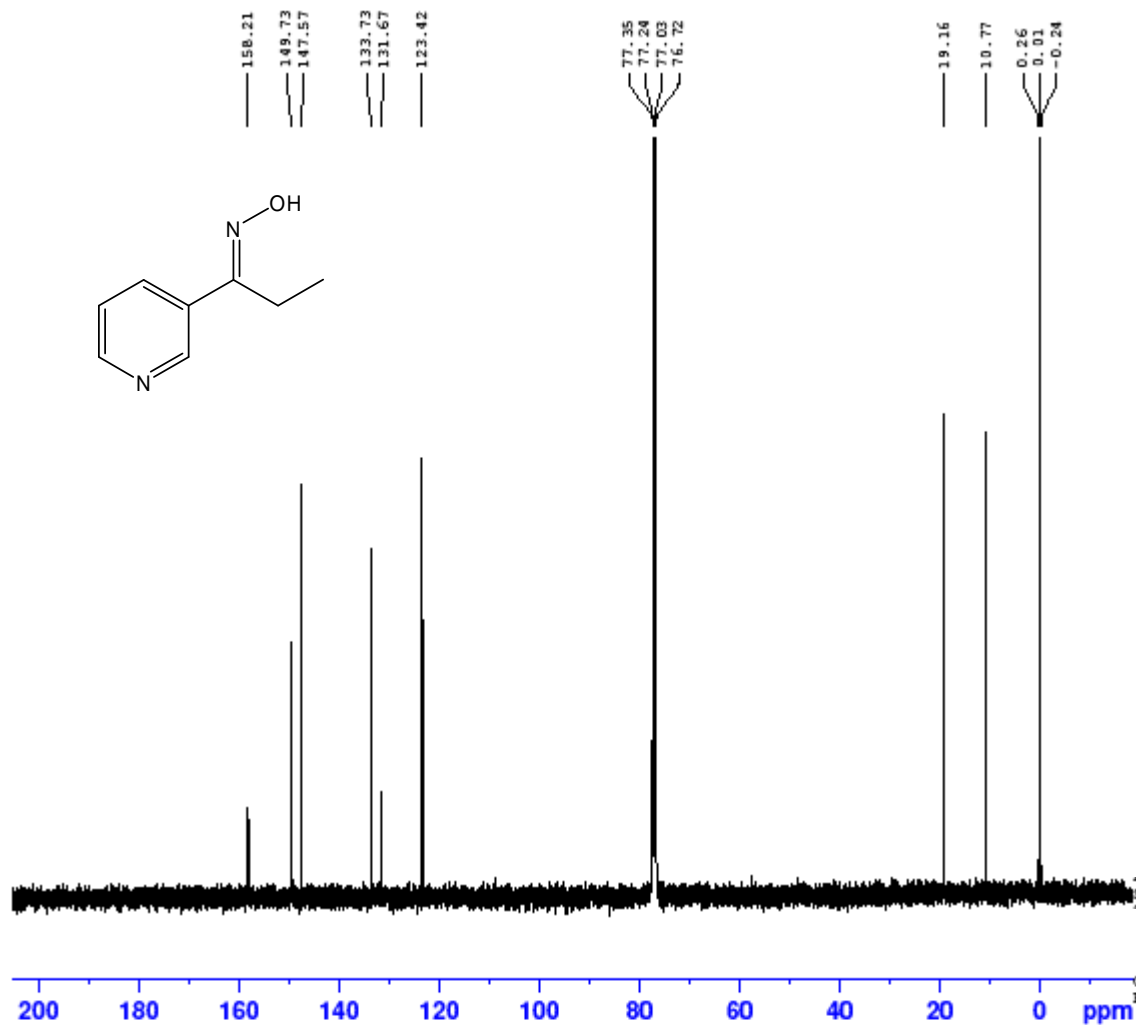

**(E)-1-(6-methoxypyridin-3-yl)ethanone oxime (14c)**

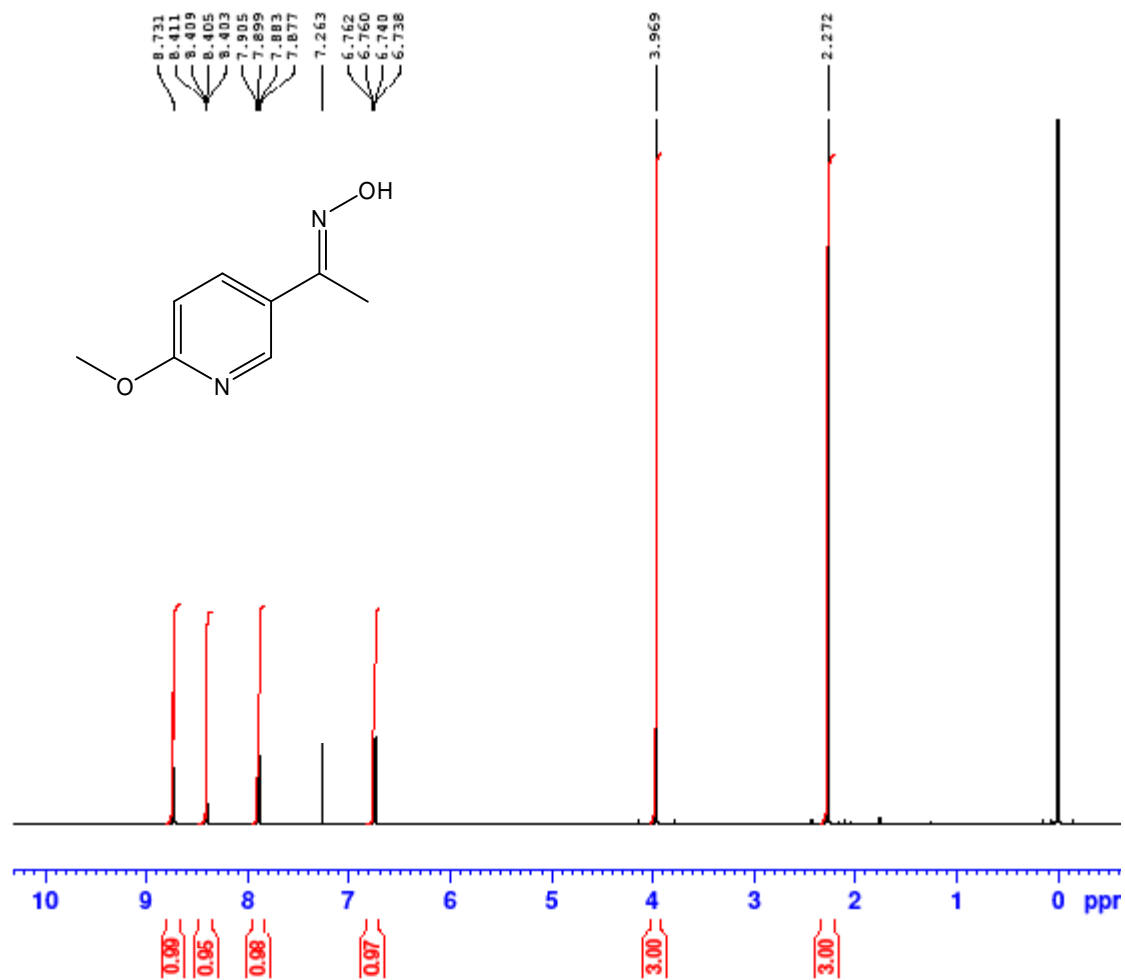

# (E)-1-(6-methoxypyridin-3-yl)ethanone oxime (14c)

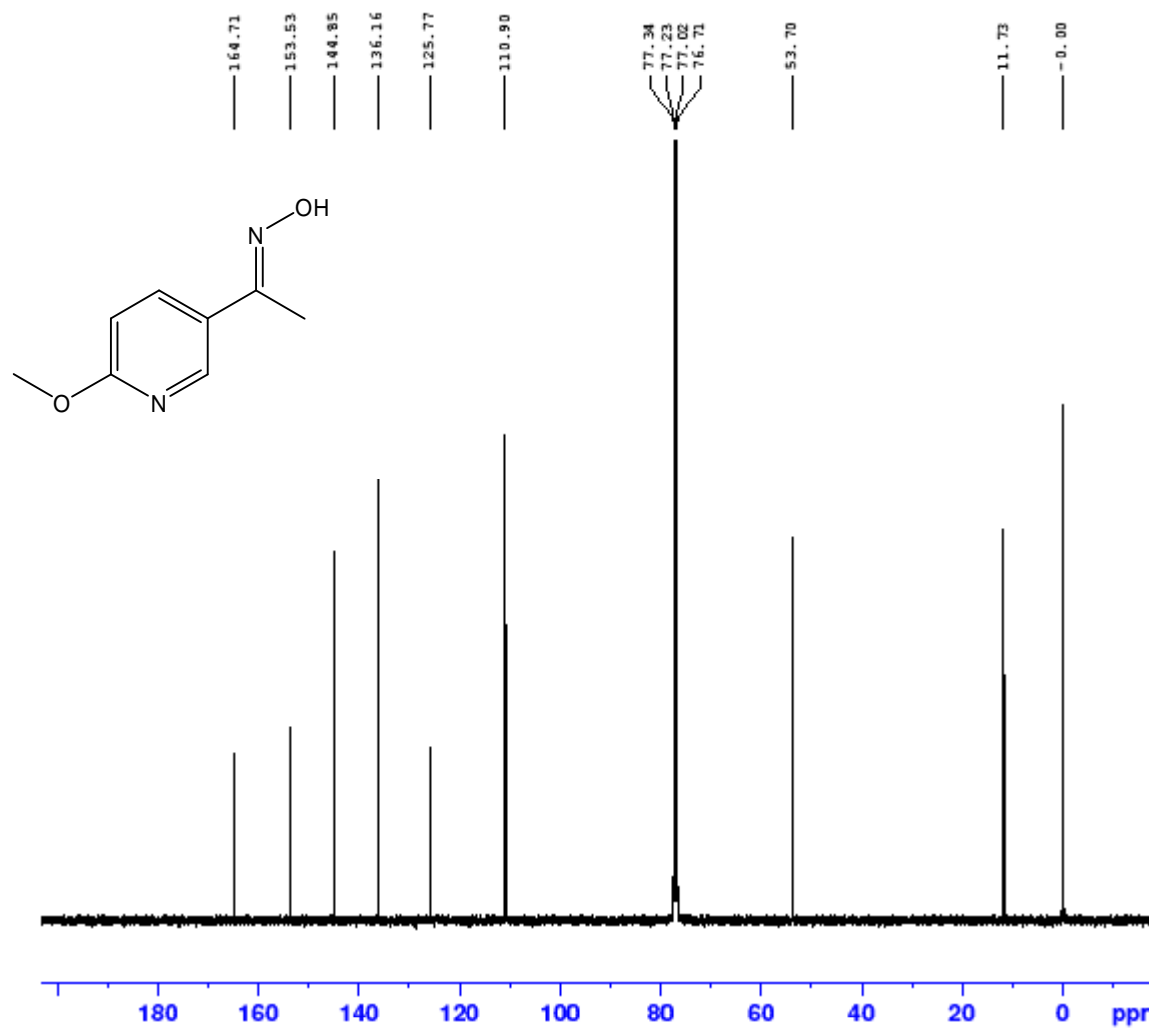

**(E)-cyclopropyl(pyridin-3-yl)methanone oxime (14d<sub>E</sub>)**

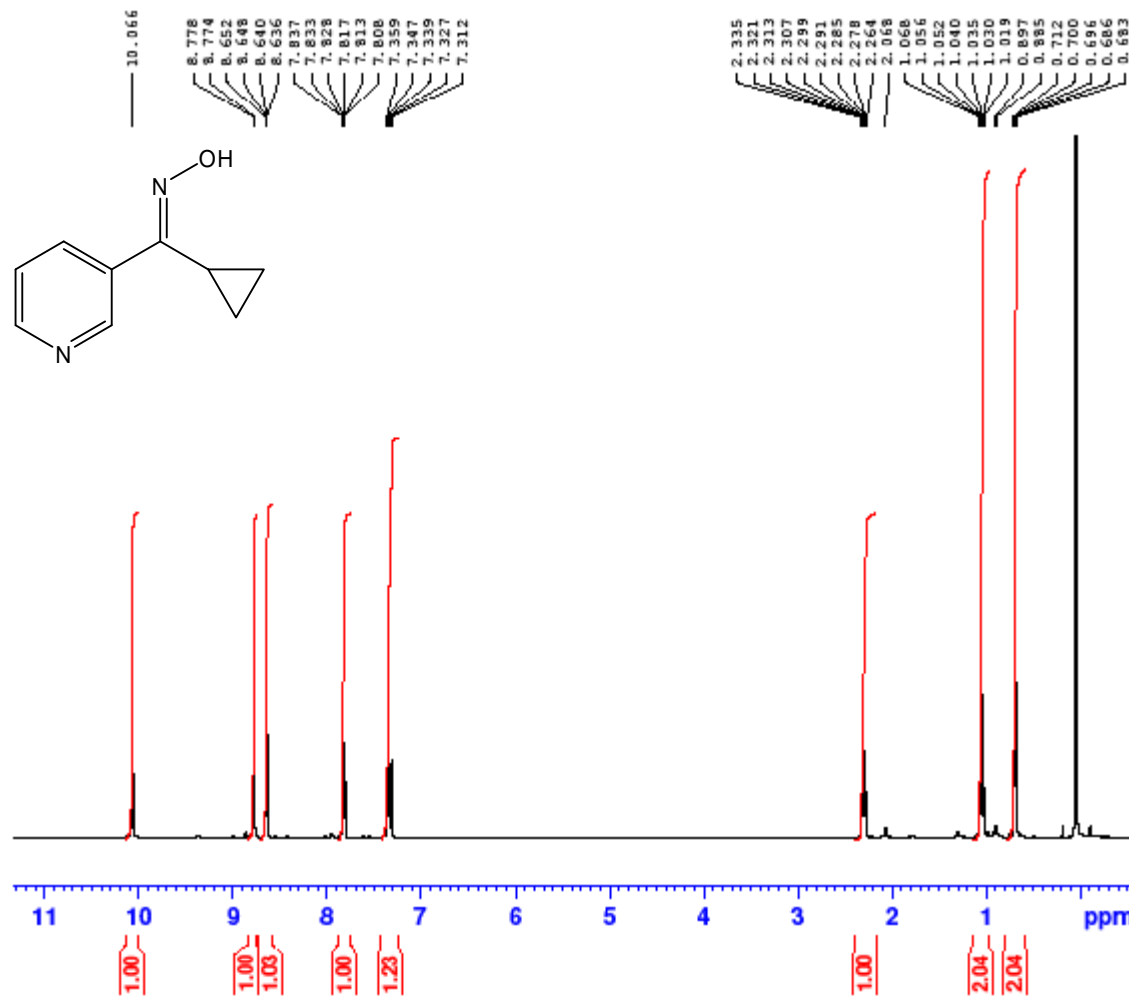

**(E)-cyclopropyl(pyridin-3-yl)methanone oxime (14d<sub>E</sub>)**

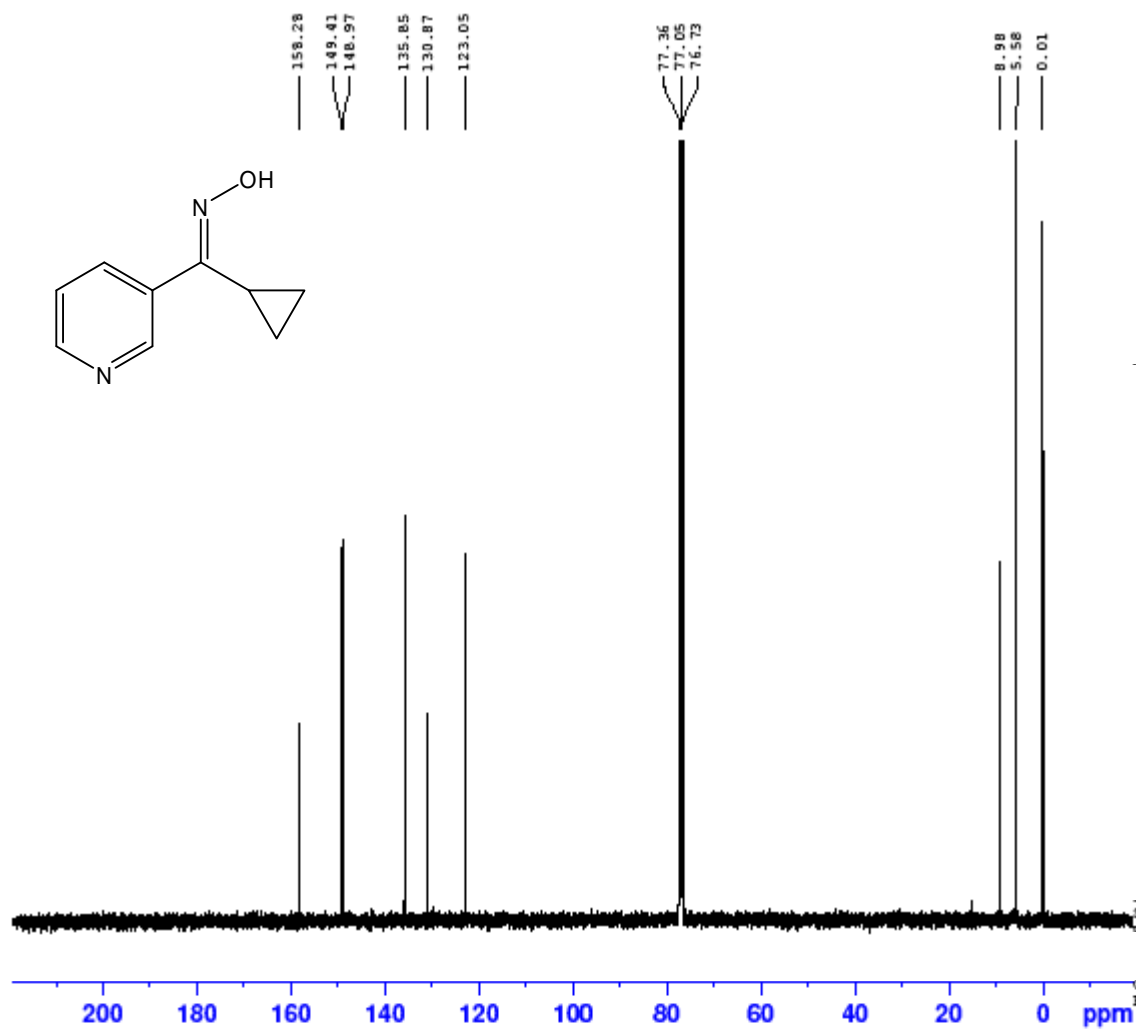



# (Z)-cyclopropyl(pyridin-3-yl)methanone oxime (14d<sub>2</sub>)

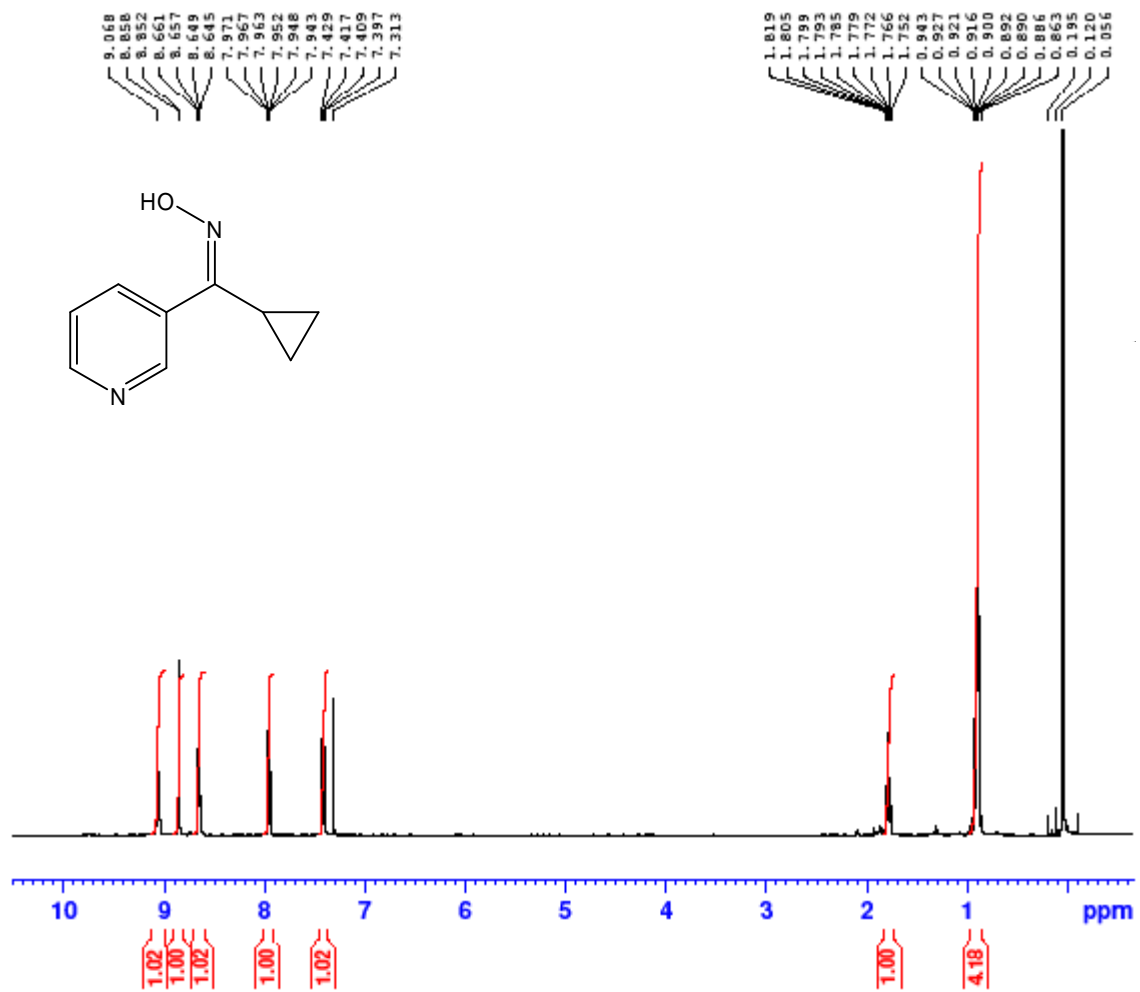

**(Z)-cyclopropyl(pyridin-3-yl)methanone oxime (14d<sub>2</sub>)**

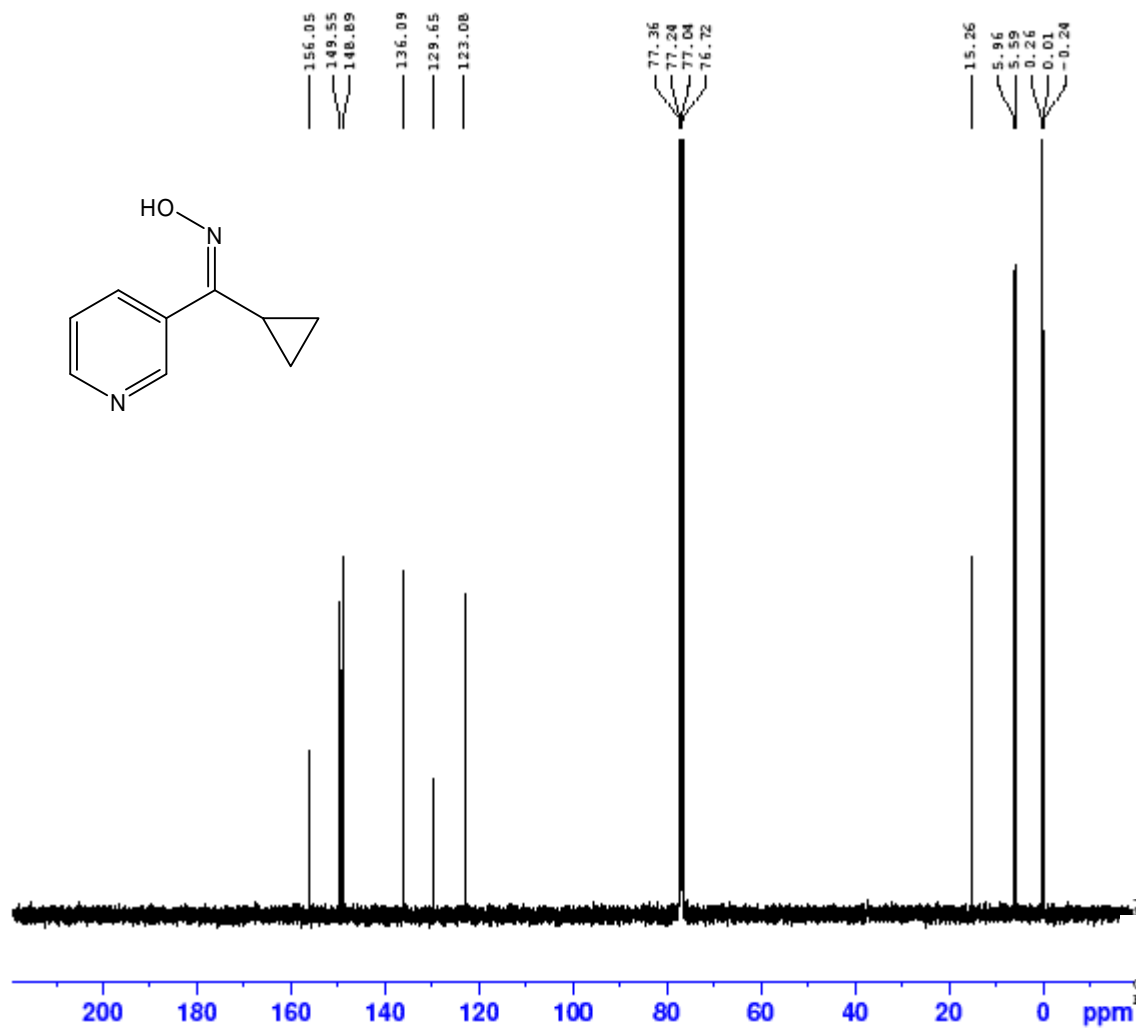

# Phenyl(pyridin-3-yl)methanone oxime (14e)

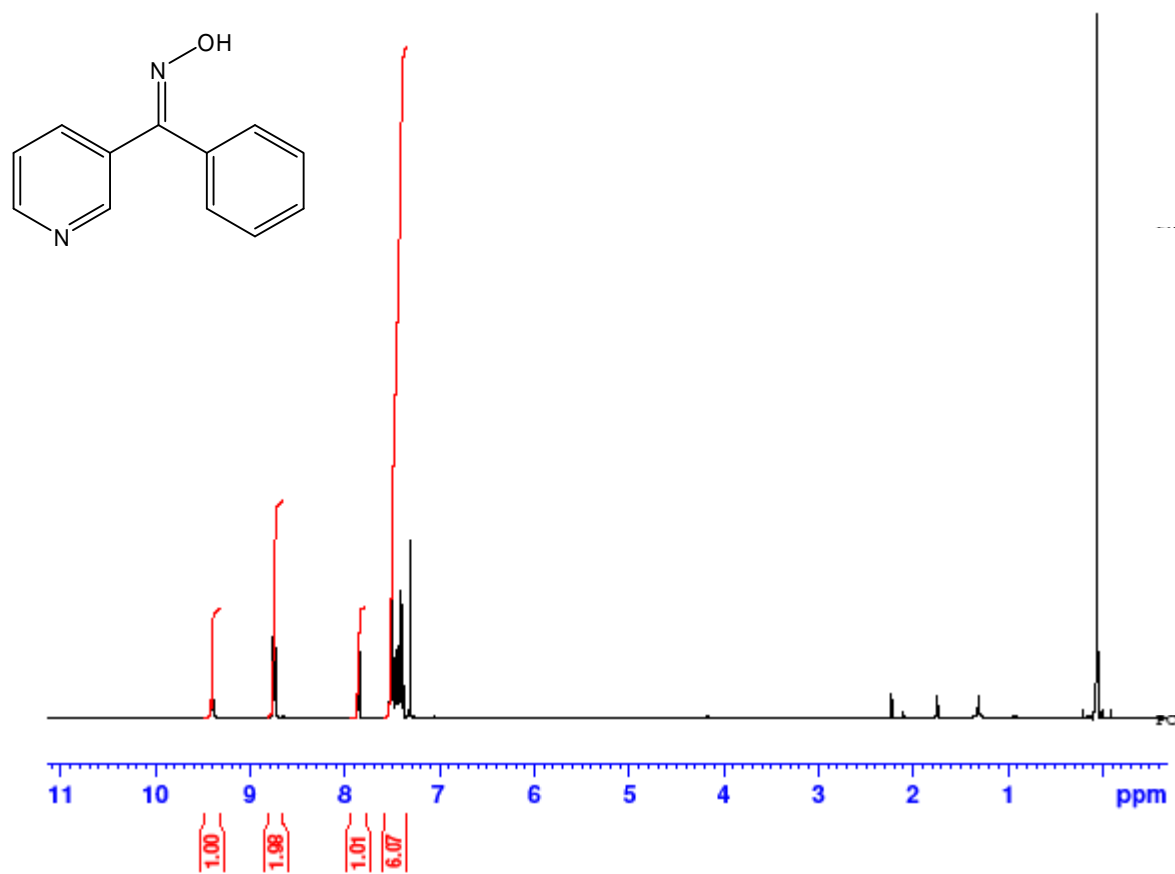

# Phenyl(pyridin-3-yl)methanone oxime (14e)

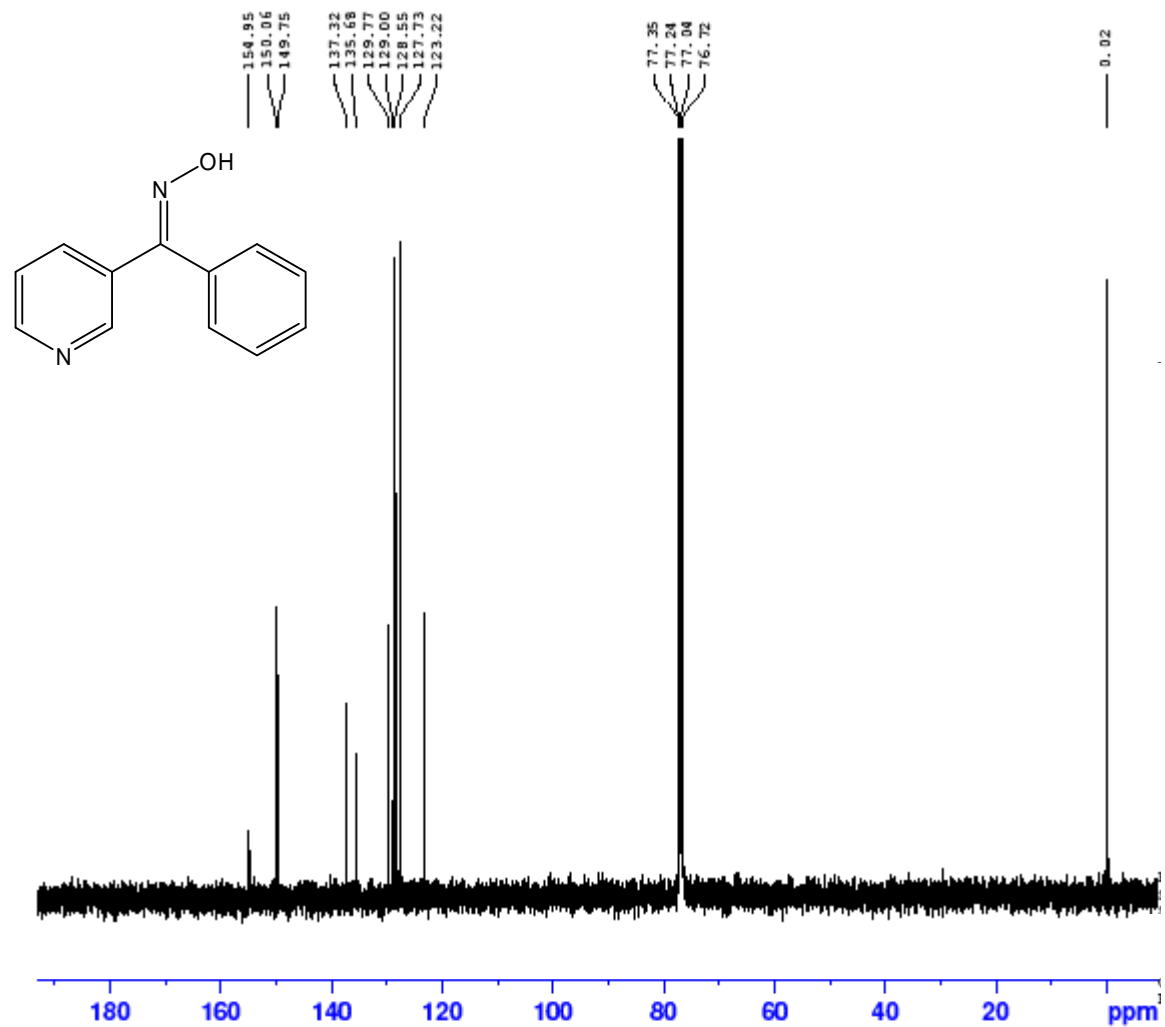

# 1-(pyridin-4-yl)ethanone oxime (14f)

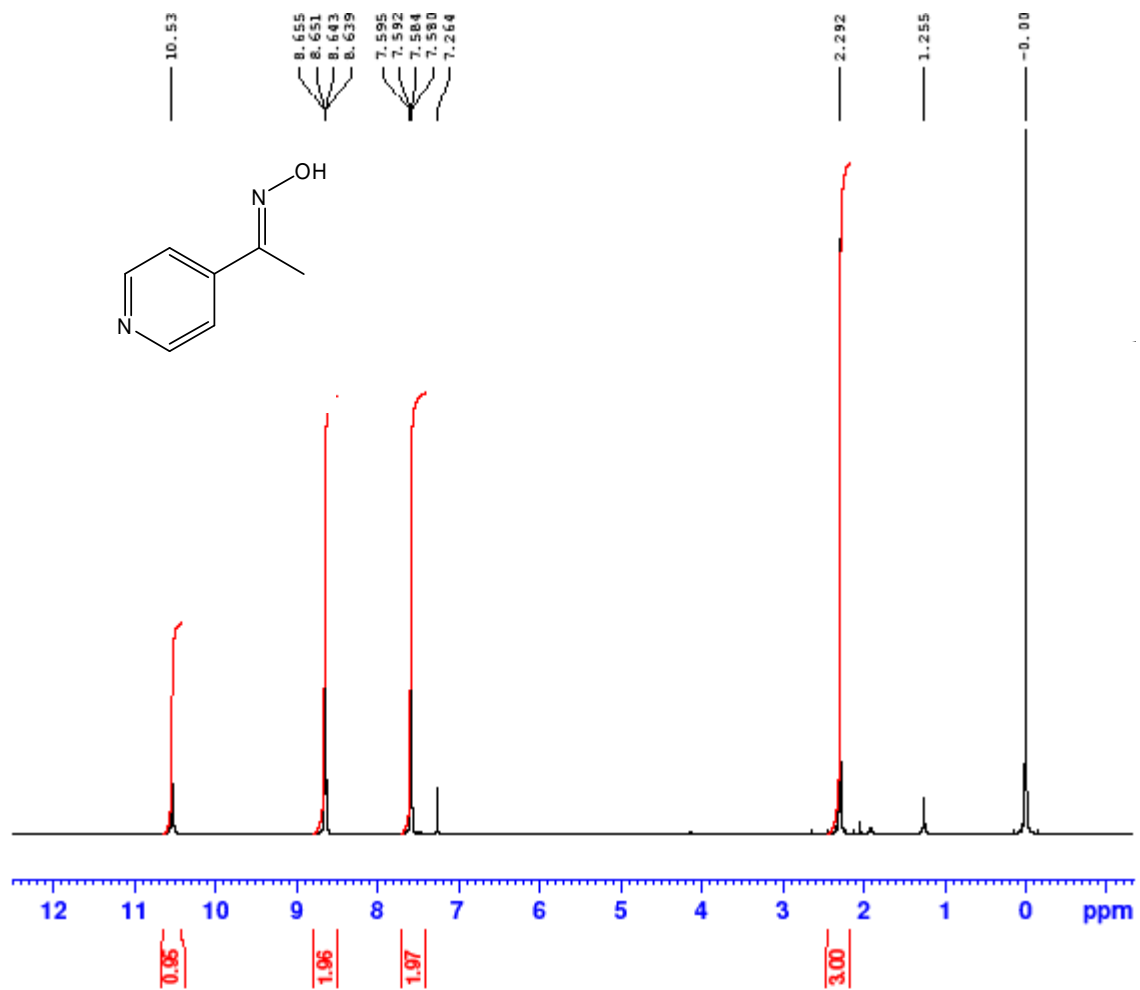

# 1-(pyridin-4-yl)ethanone oxime (14f)

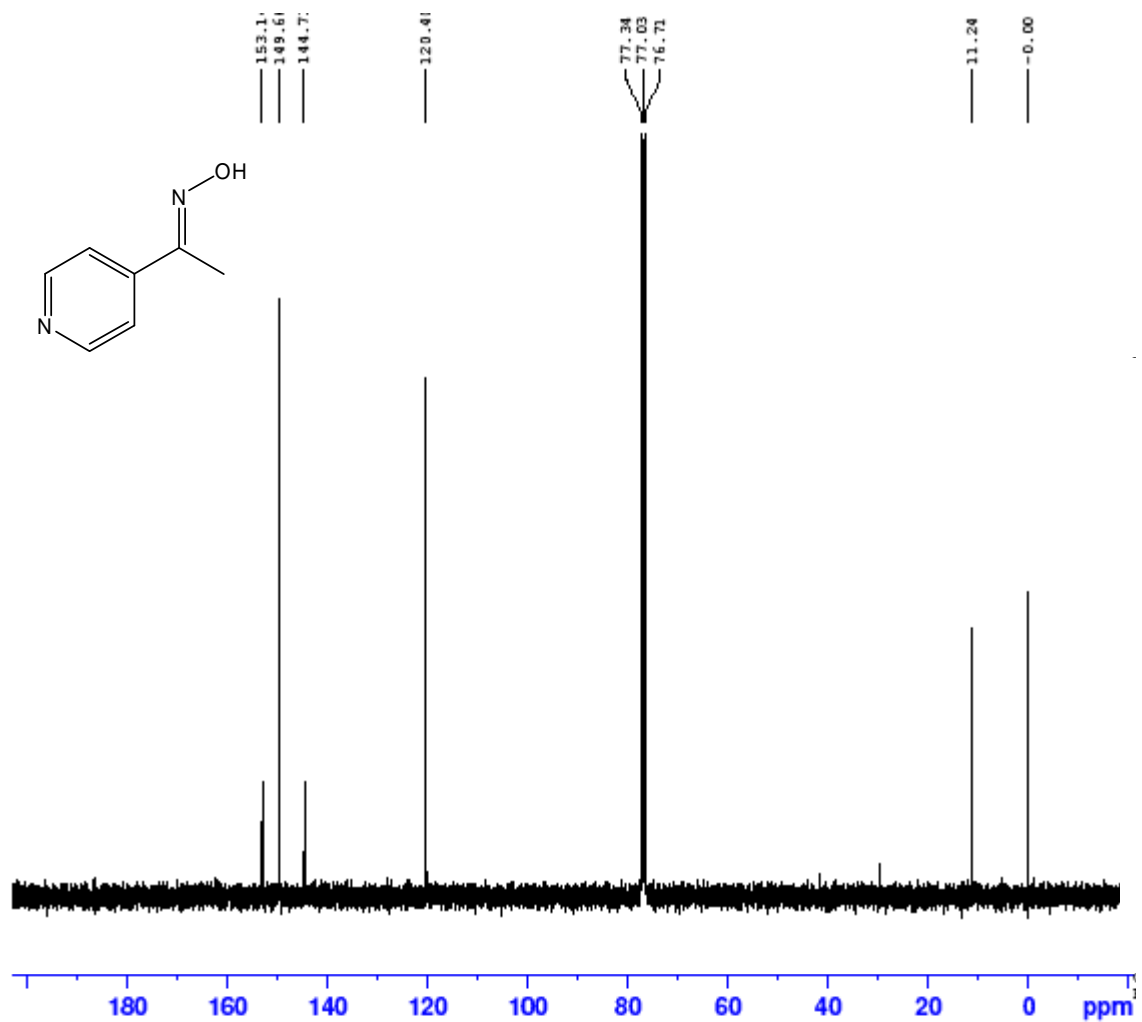

# 1-(pyridin-4-yl)propan-1-one oxime (14g)

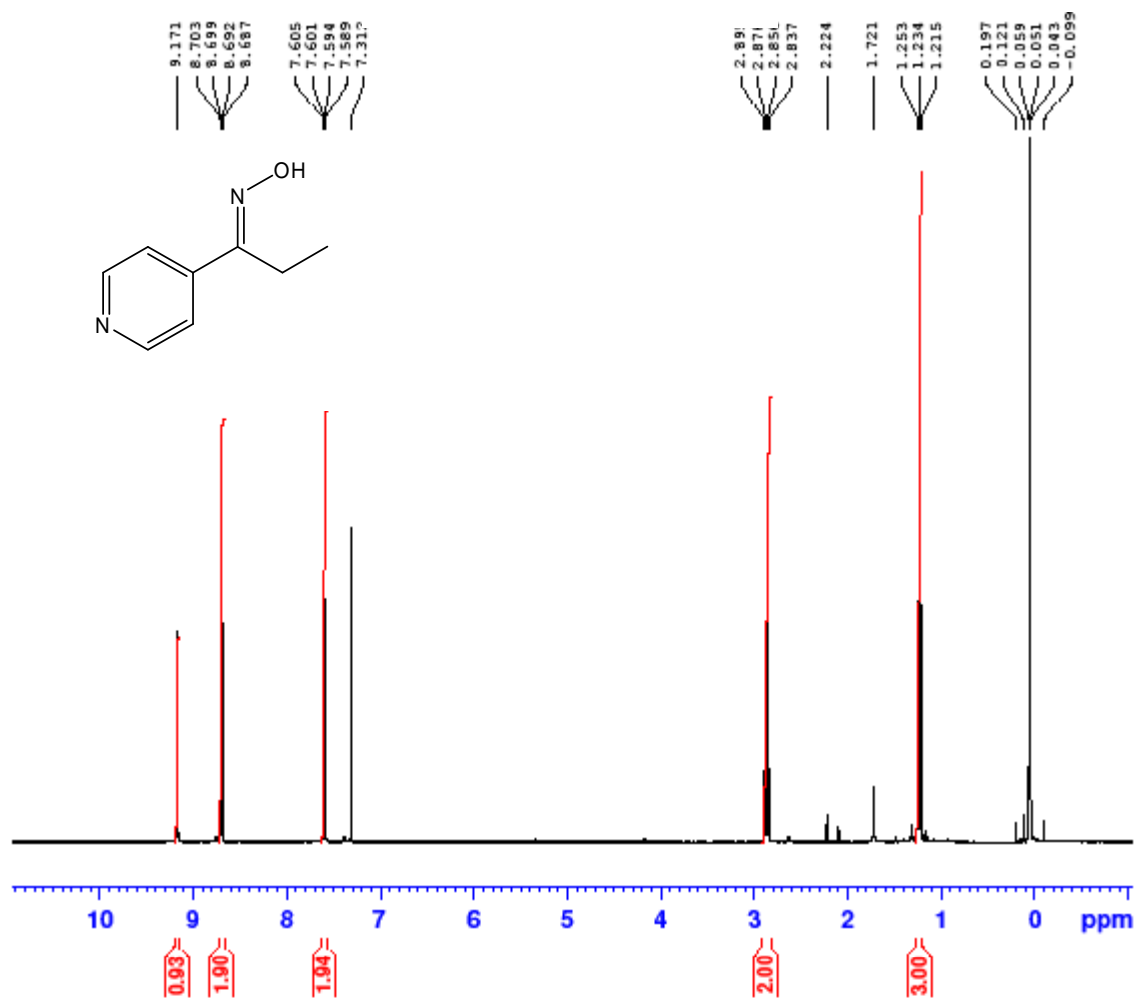

# 1-(pyridin-4-yl)propan-1-one oxime (14g)

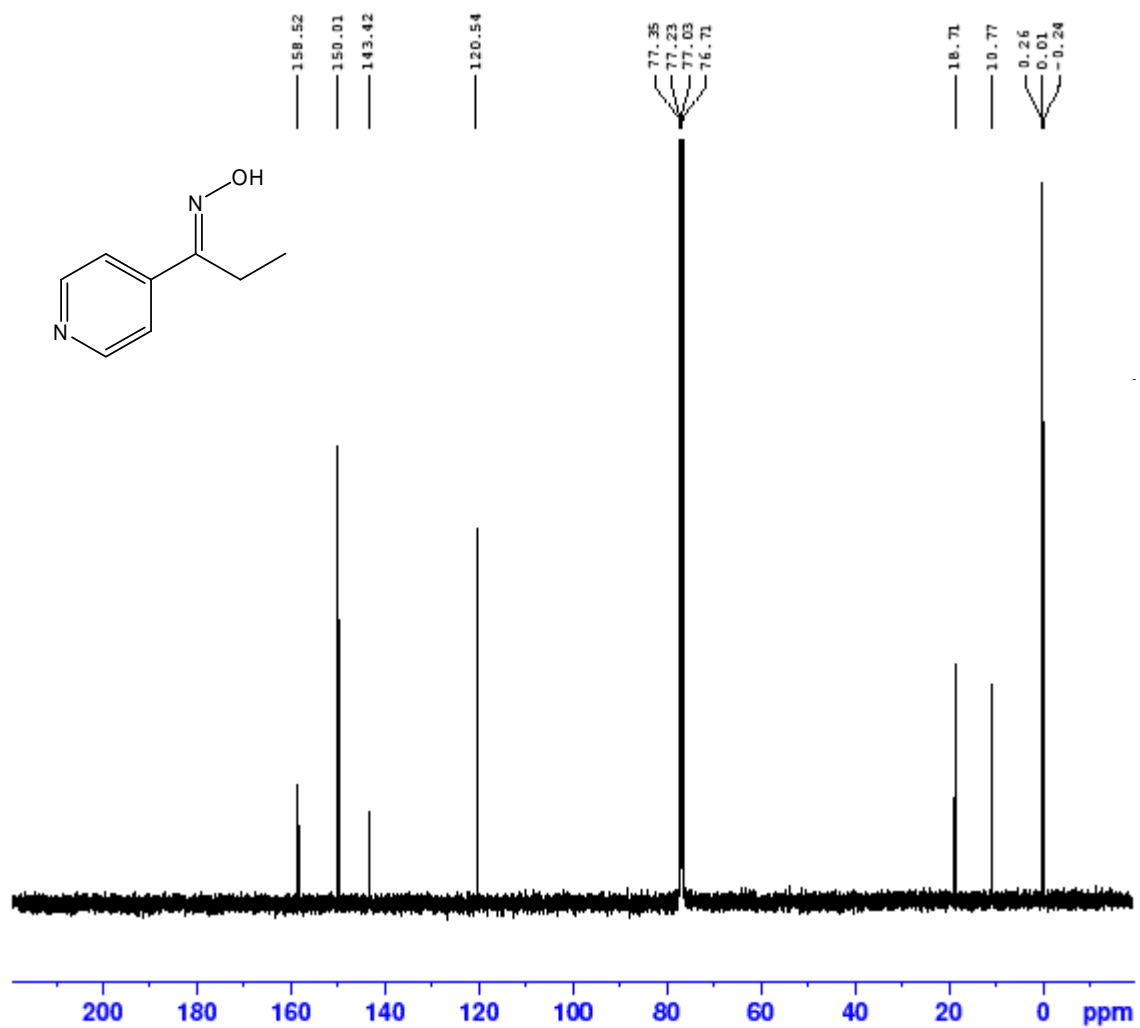



# (E)-cyclopropyl(pyridin-4-yl)methanone oxime (14h<sub>E</sub>)

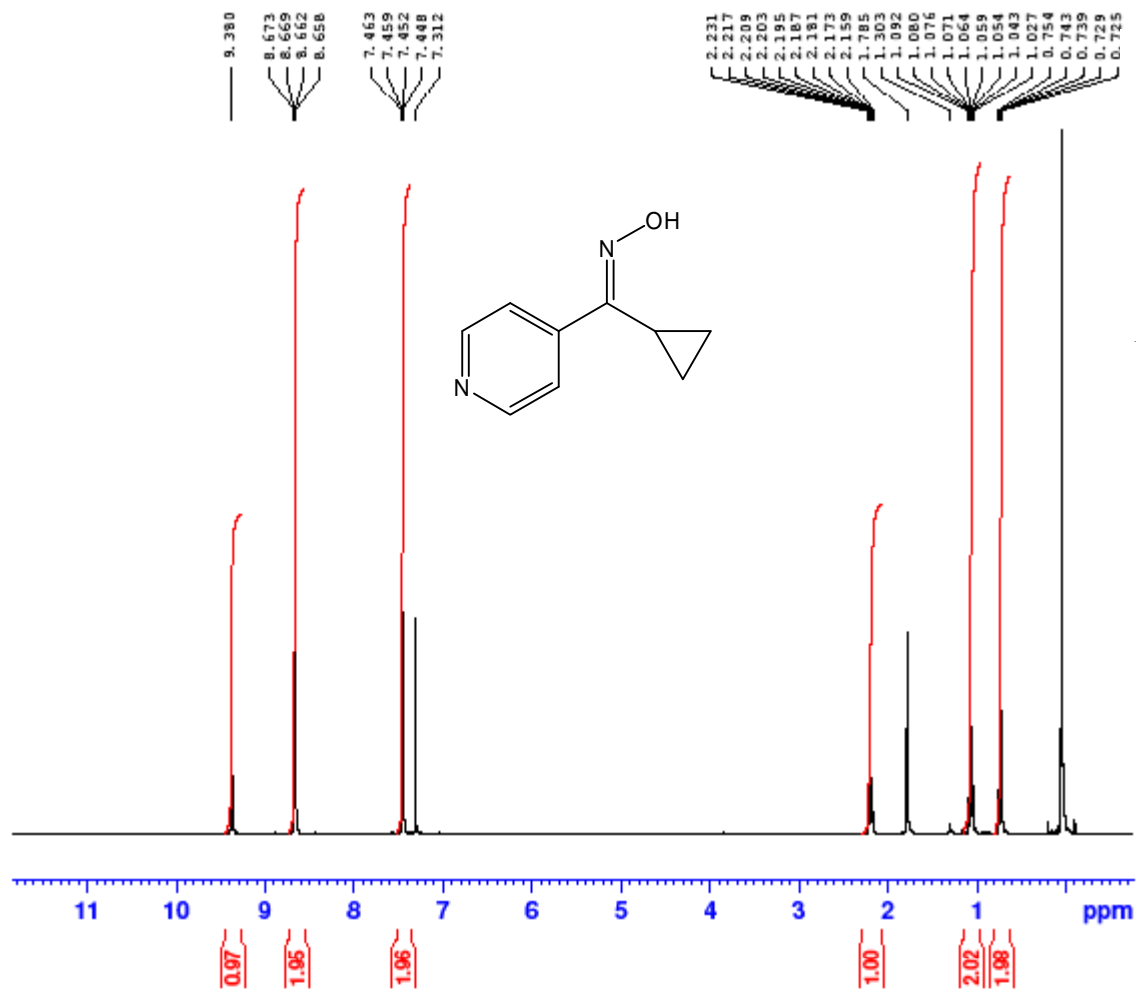

**(E)-cyclopropyl(pyridin-4-yl)methanone oxime (14h<sub>E</sub>)**

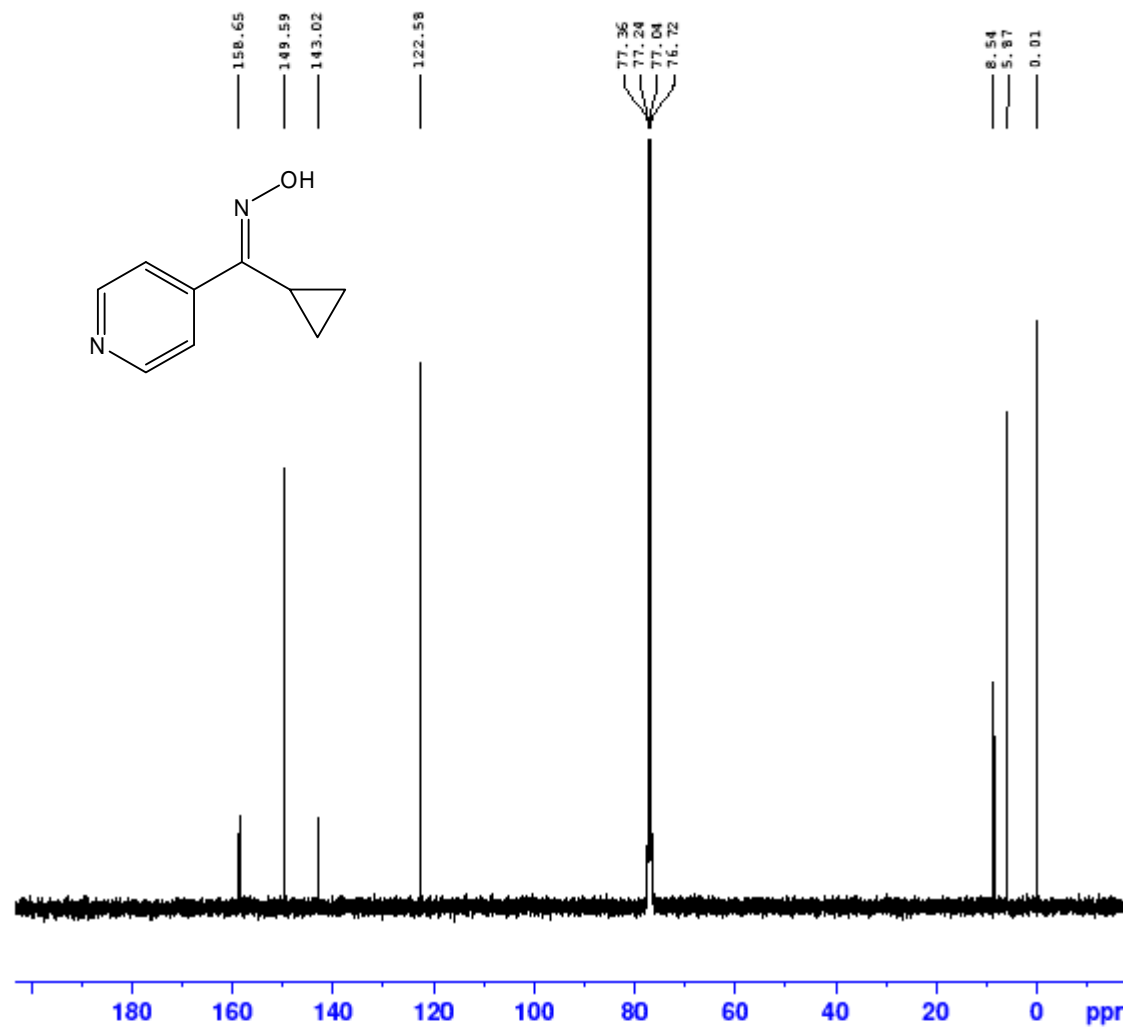

**(Z)-cyclopropyl(pyridin-4-yl)methanone oxime (14h<sub>2</sub>)**

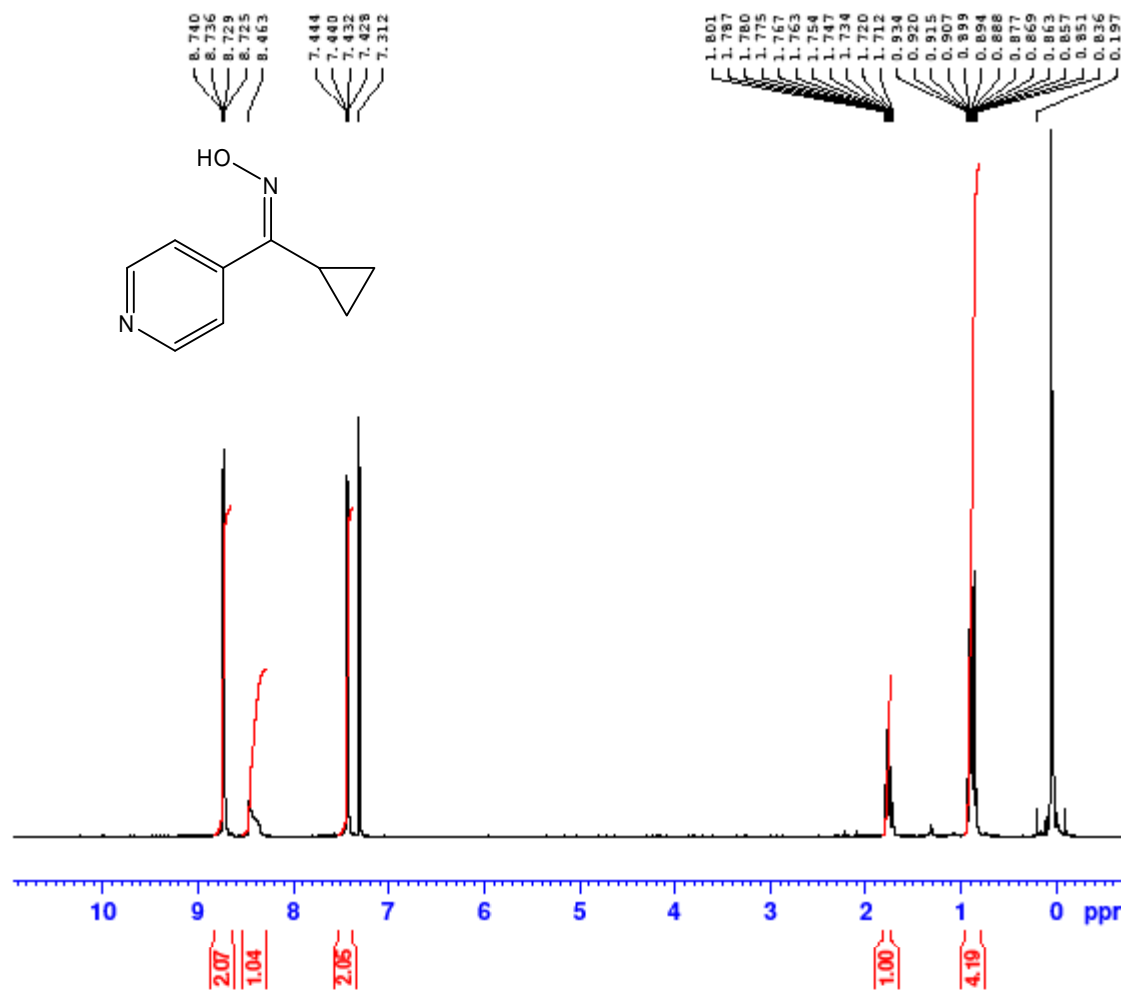

**(Z)-cyclopropyl(pyridin-4-yl)methanone oxime (14h<sub>2</sub>)**

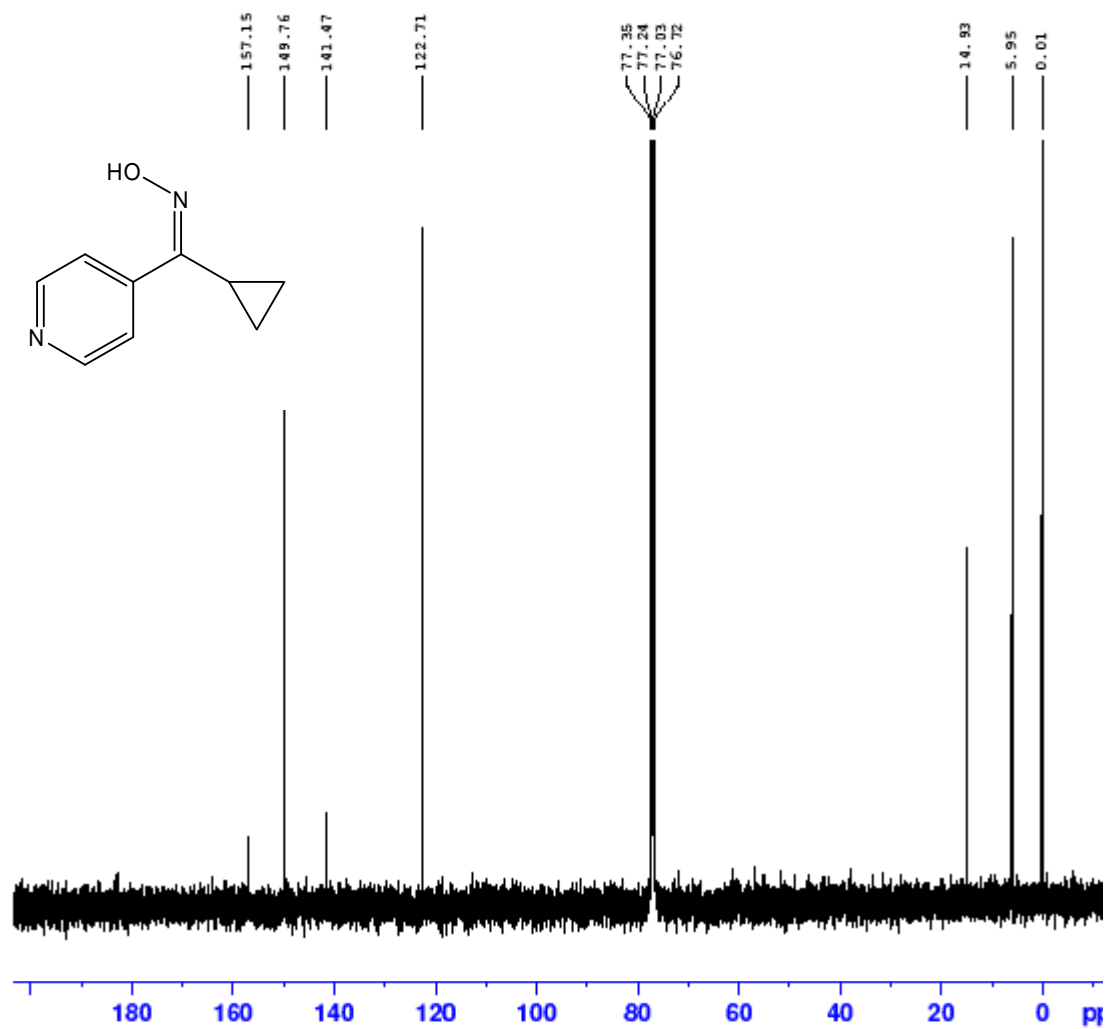

**(E)-1-(pyridine-3yl)-4-(triisopropylsilyloxy)butan-1-one oxime (14i)**

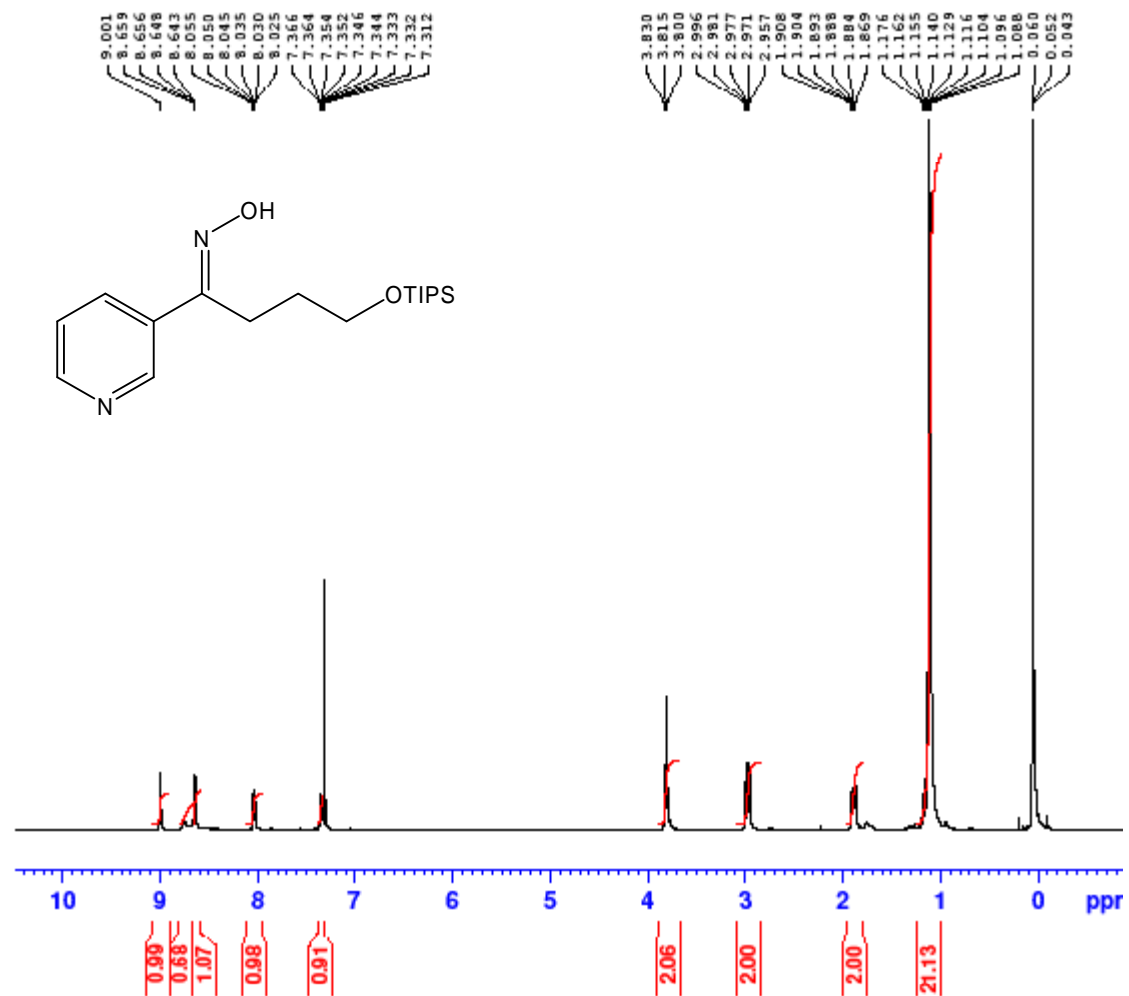



**(E)-1-(Thiophen-3-yl)ethanone O-benzoyloxime (15a)**

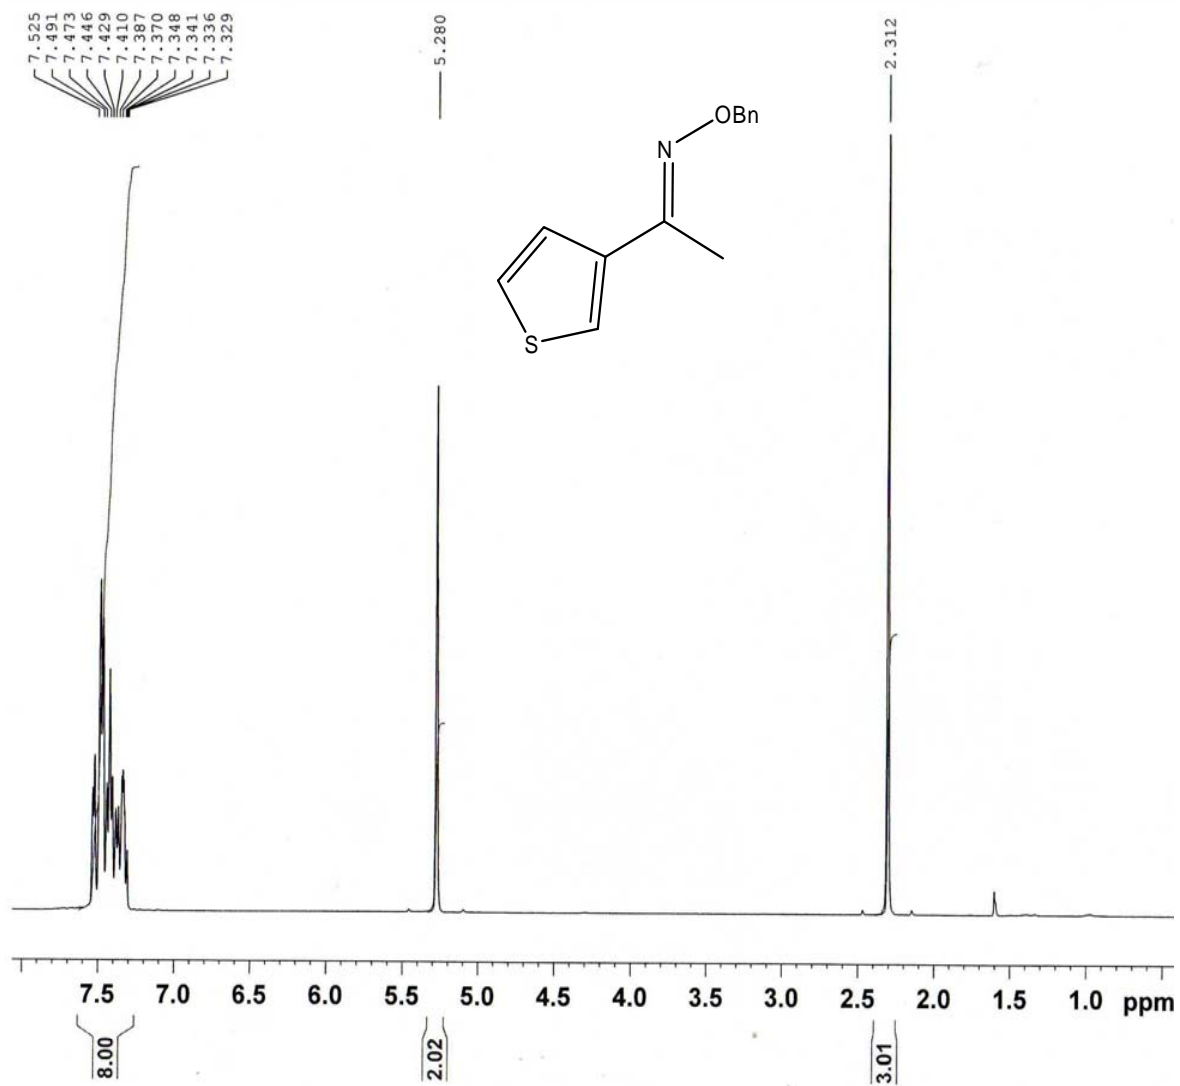

**(E)-1-(Thiophen-3-yl)ethanone O-benzoyloxime (15a)**

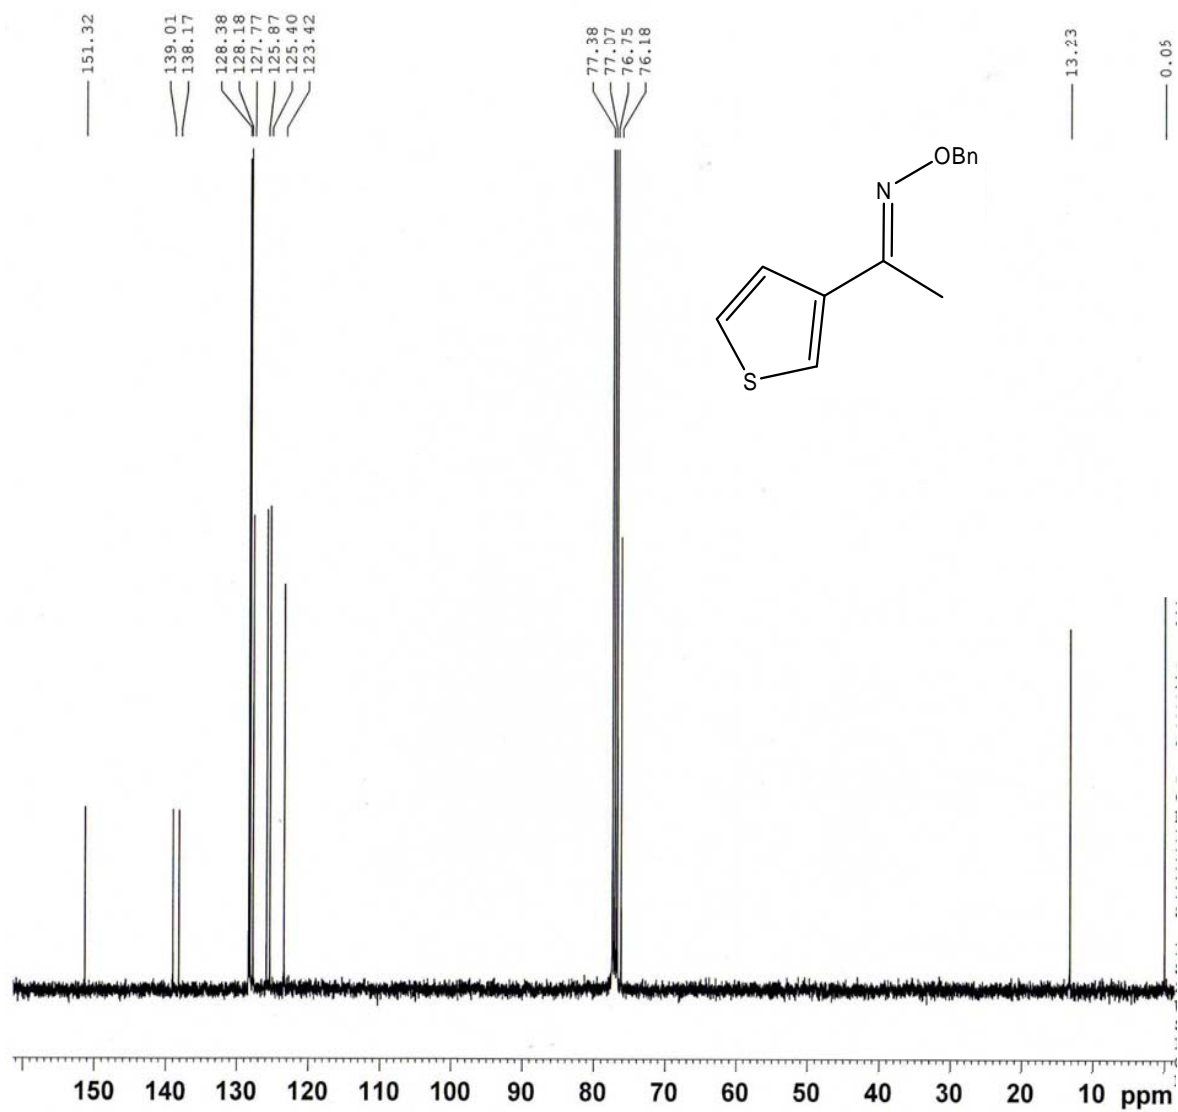



**(E)-1-(2,5-dimethylthiophen-3-yl)ethanone O-benzyl oxime (15b)**

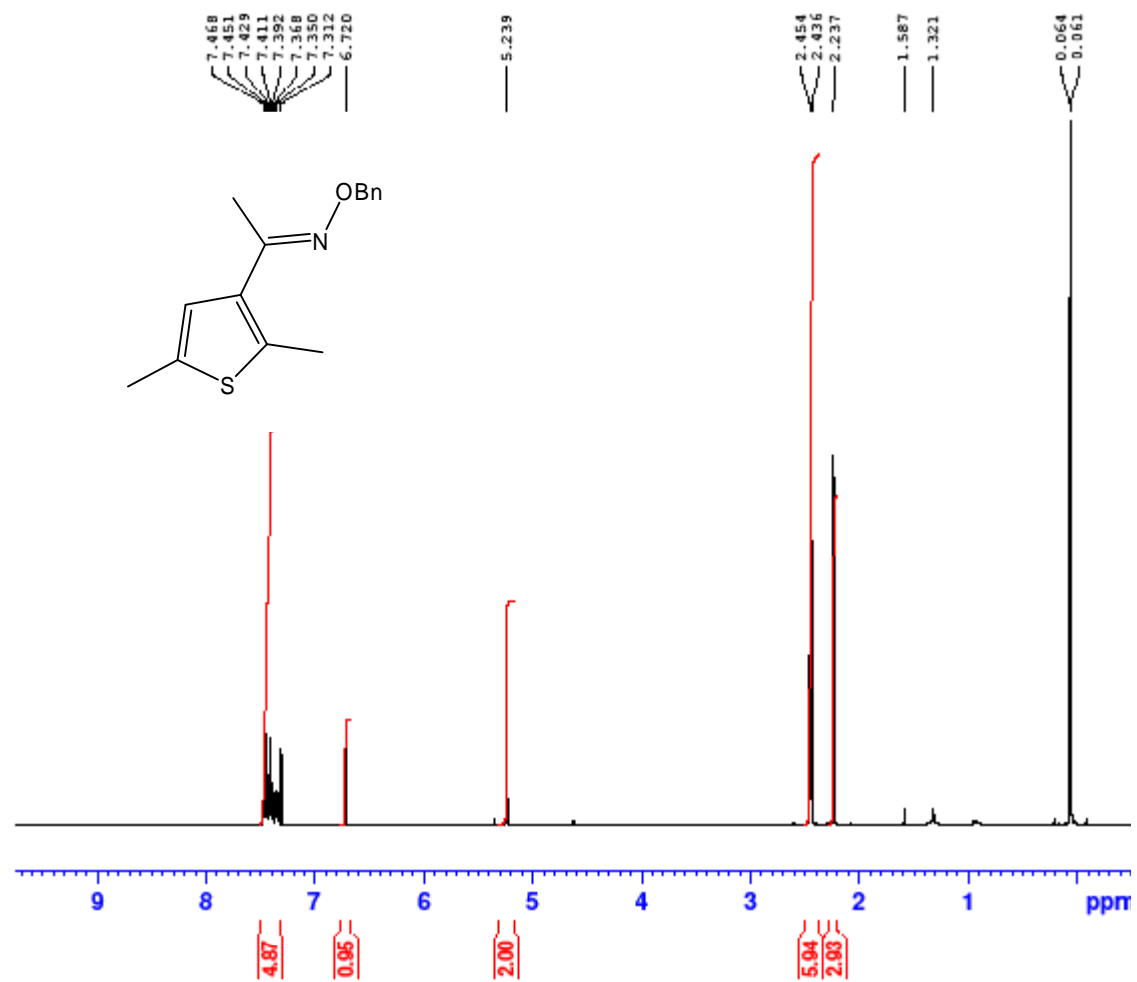

**(E)-1-(2,5-dimethylthiophen-3-yl)ethanone O-benzyl oxime (15b)**

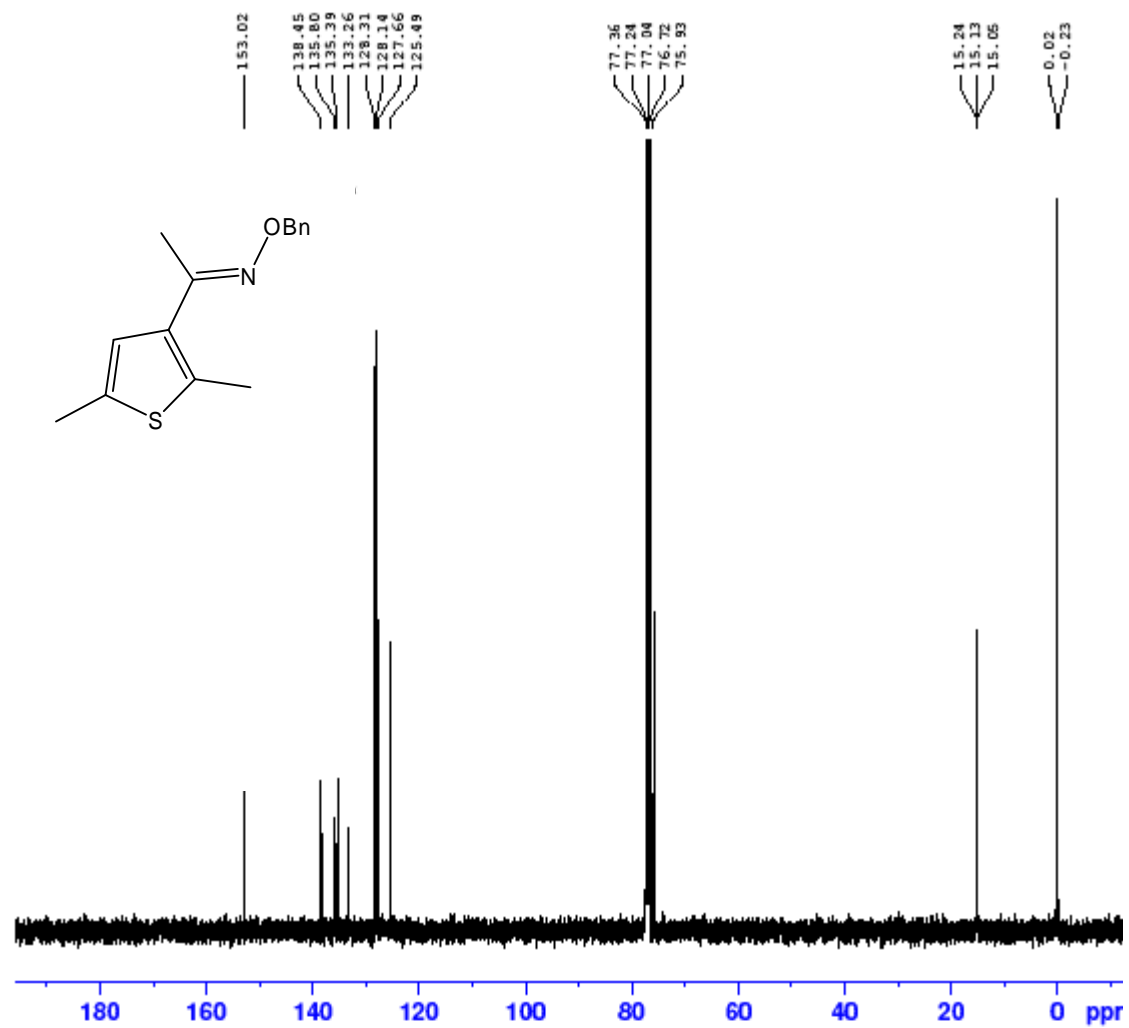

# (E)-Chroman-4-one O-benzyl oxime (15c)

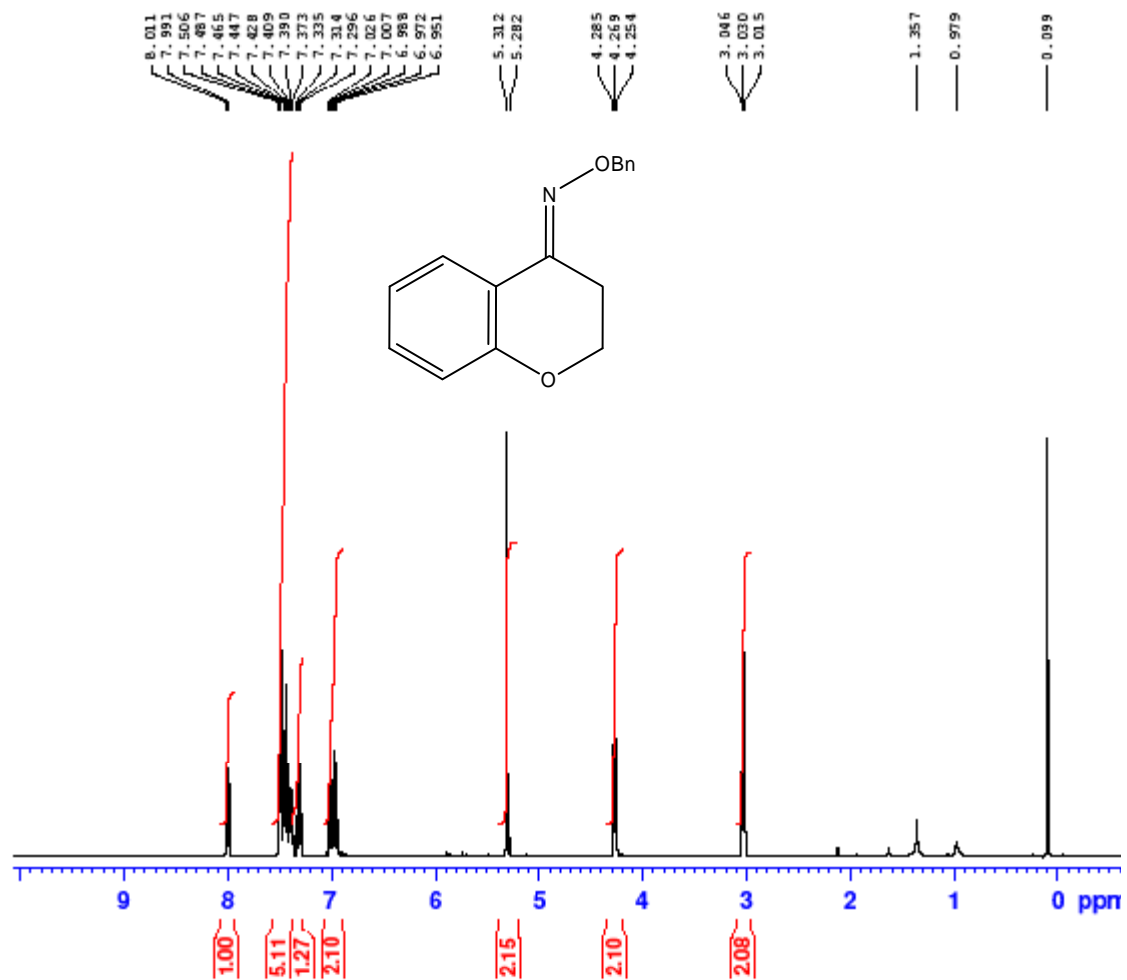

# (E)-Chroman-4-one O-benzyl oxime (15c)

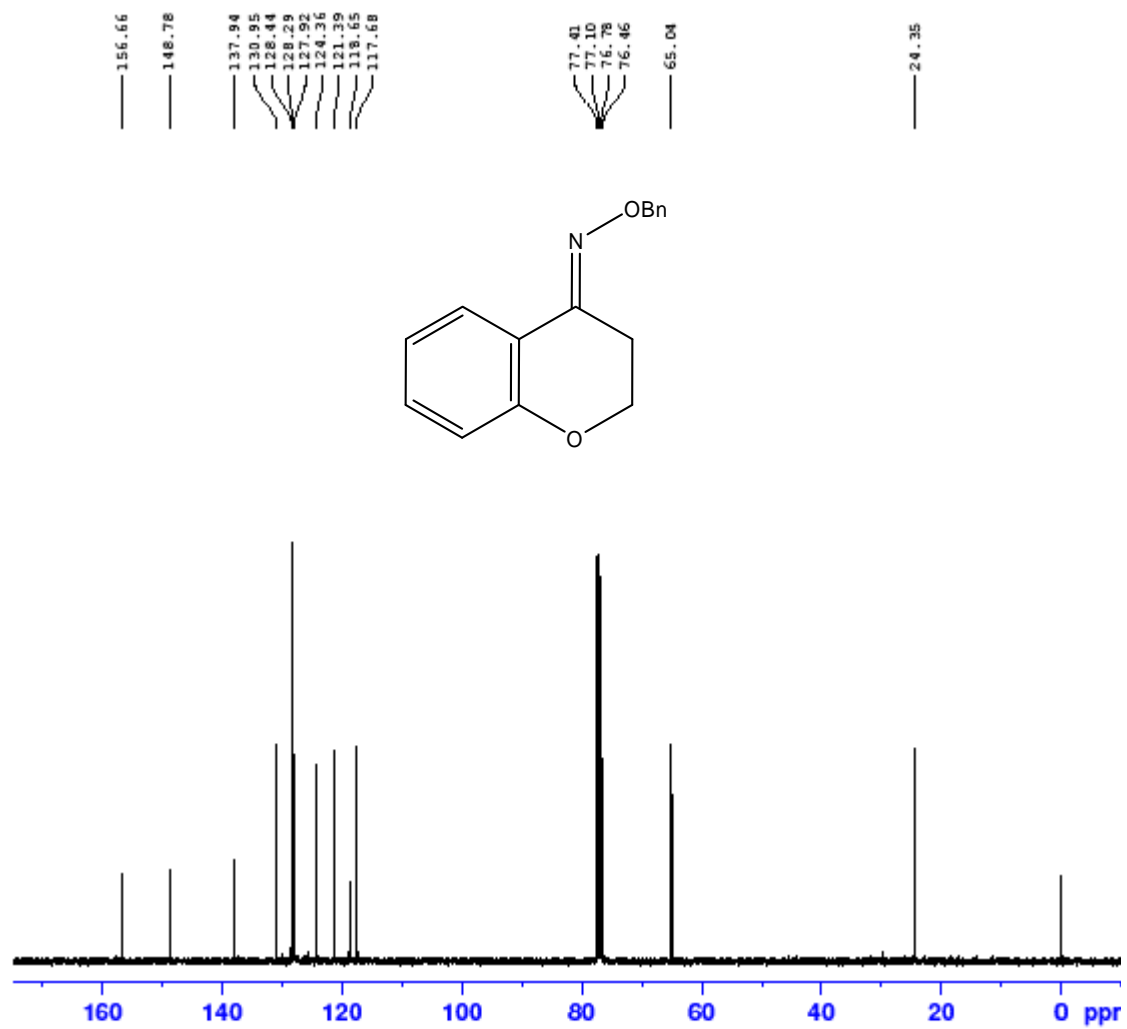

# (E)-6-Chlorochroman-4-one O-benzyl oxime (15d)

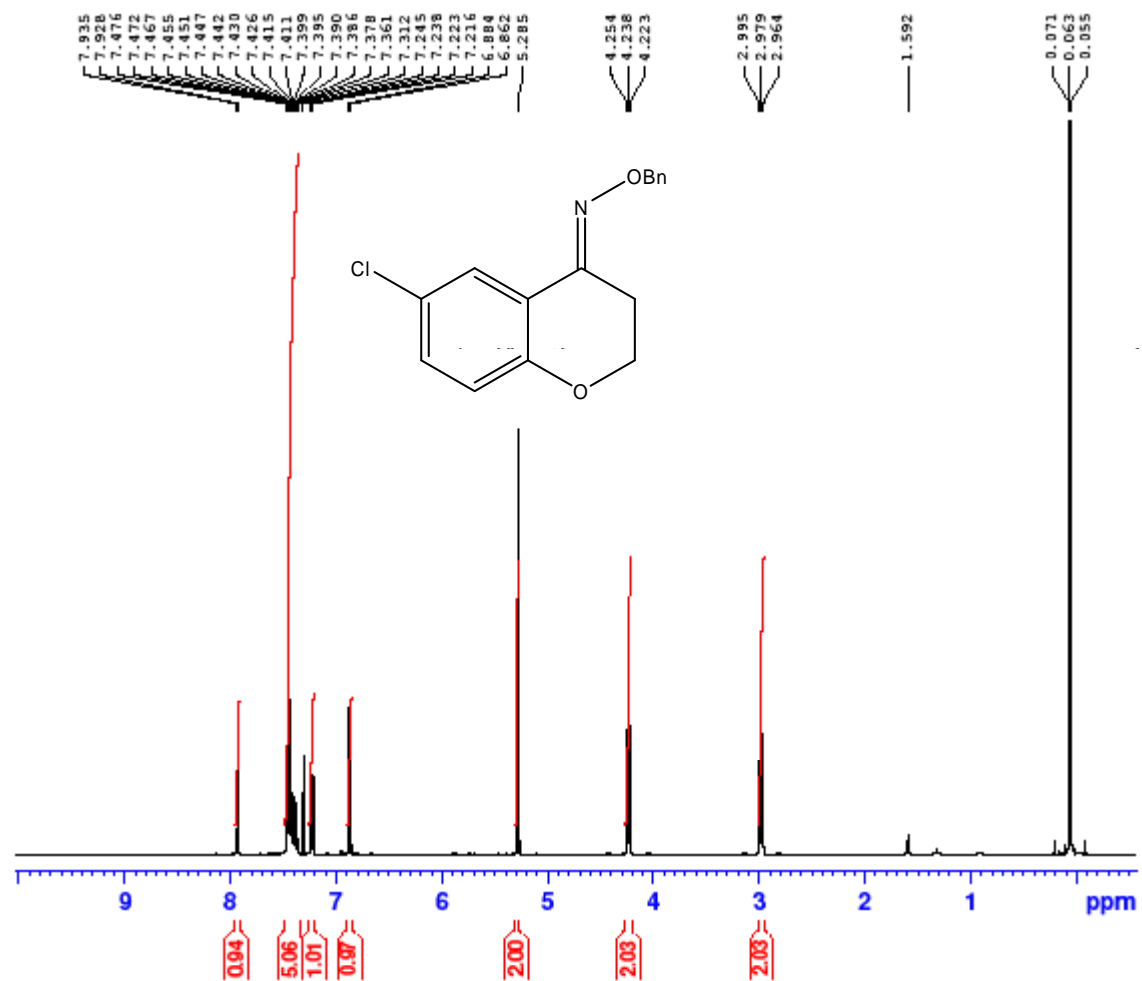

**(E)-6-Chlorochroman-4-one O-benzyl oxime (15d)**

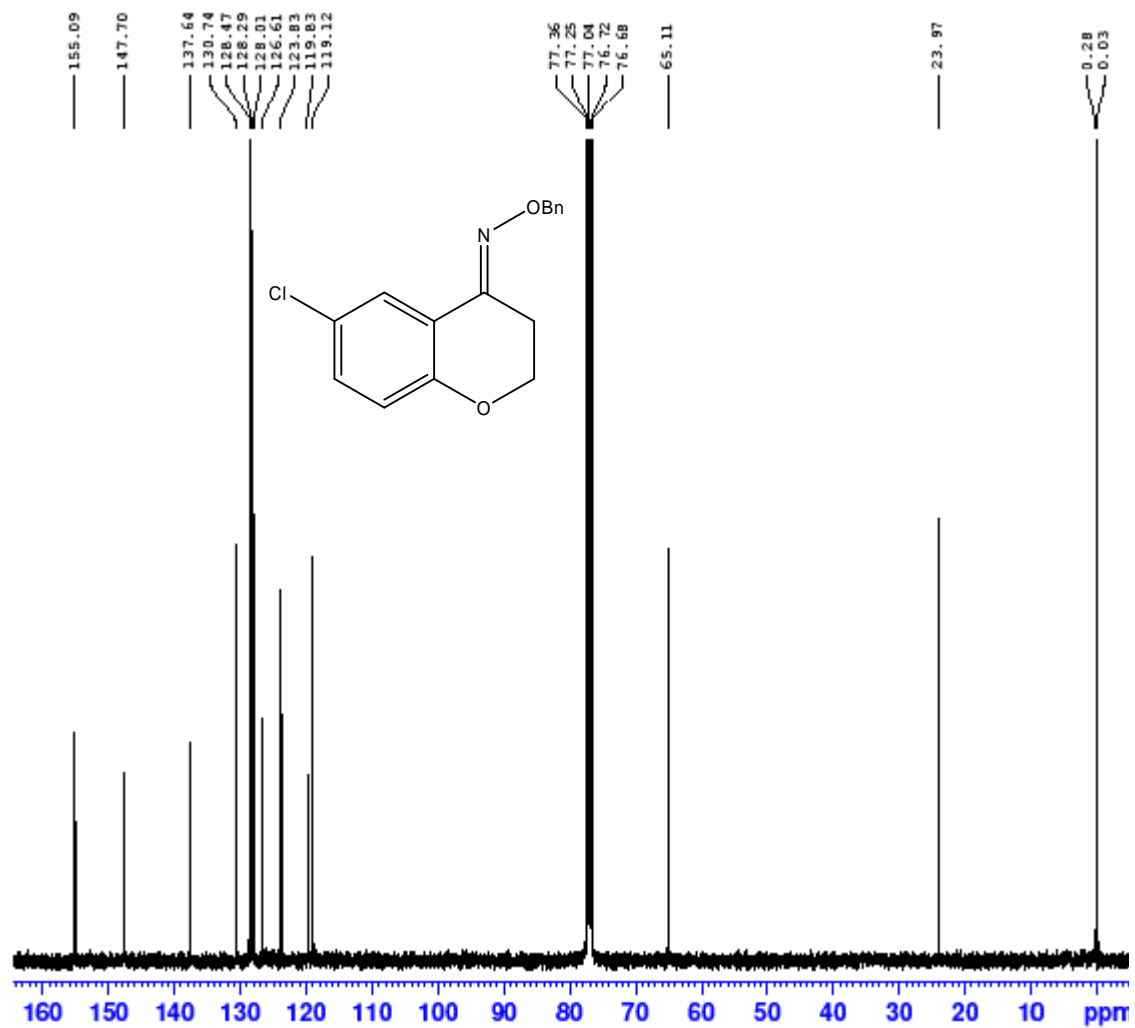

# (E)-Thiochroman-4-one O-benzyl oxime (15e)

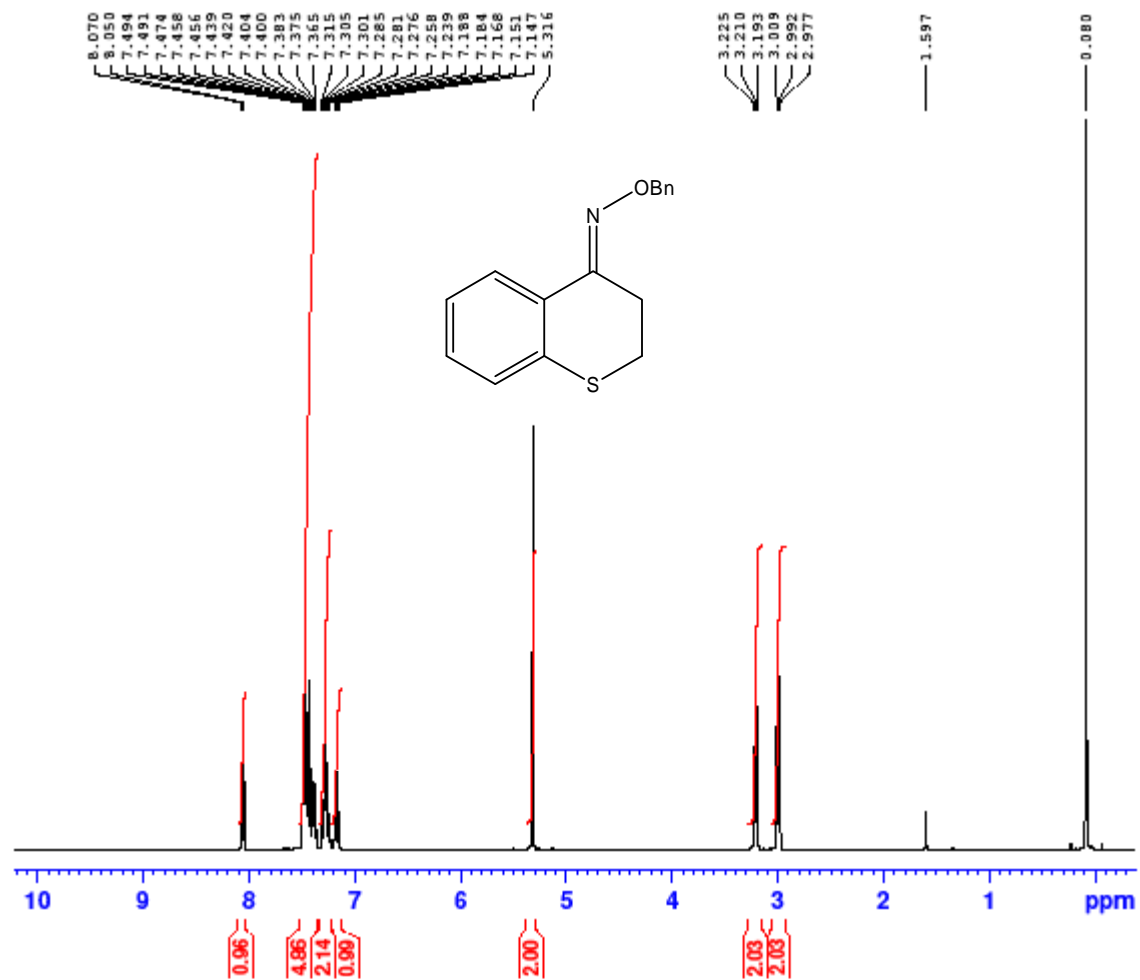

**(E)-Thiochroman-4-one O-benzyl oxime (15e)**

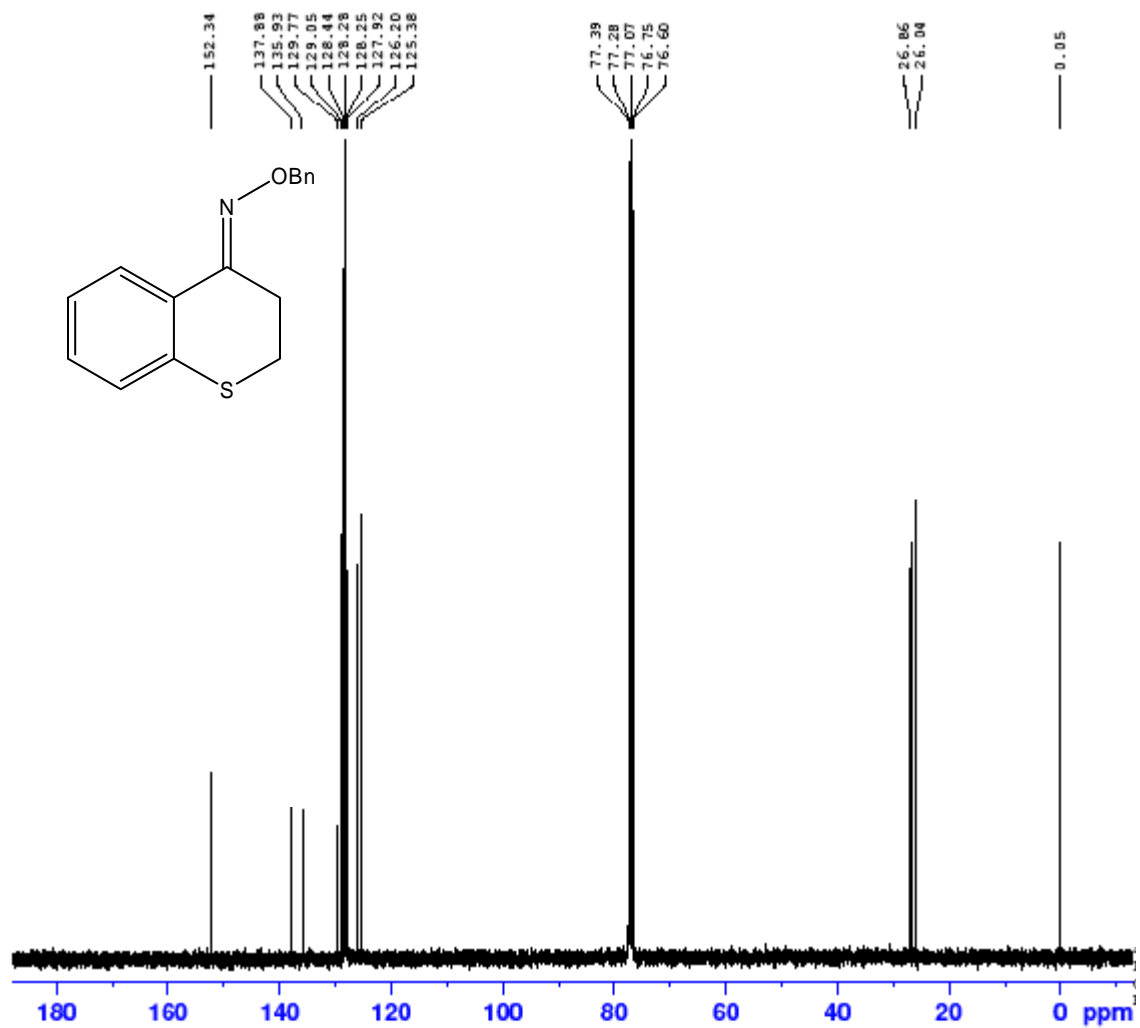



**(E)-6-Chlorothiochroman-4-one O-benzyl oxime (15f)**

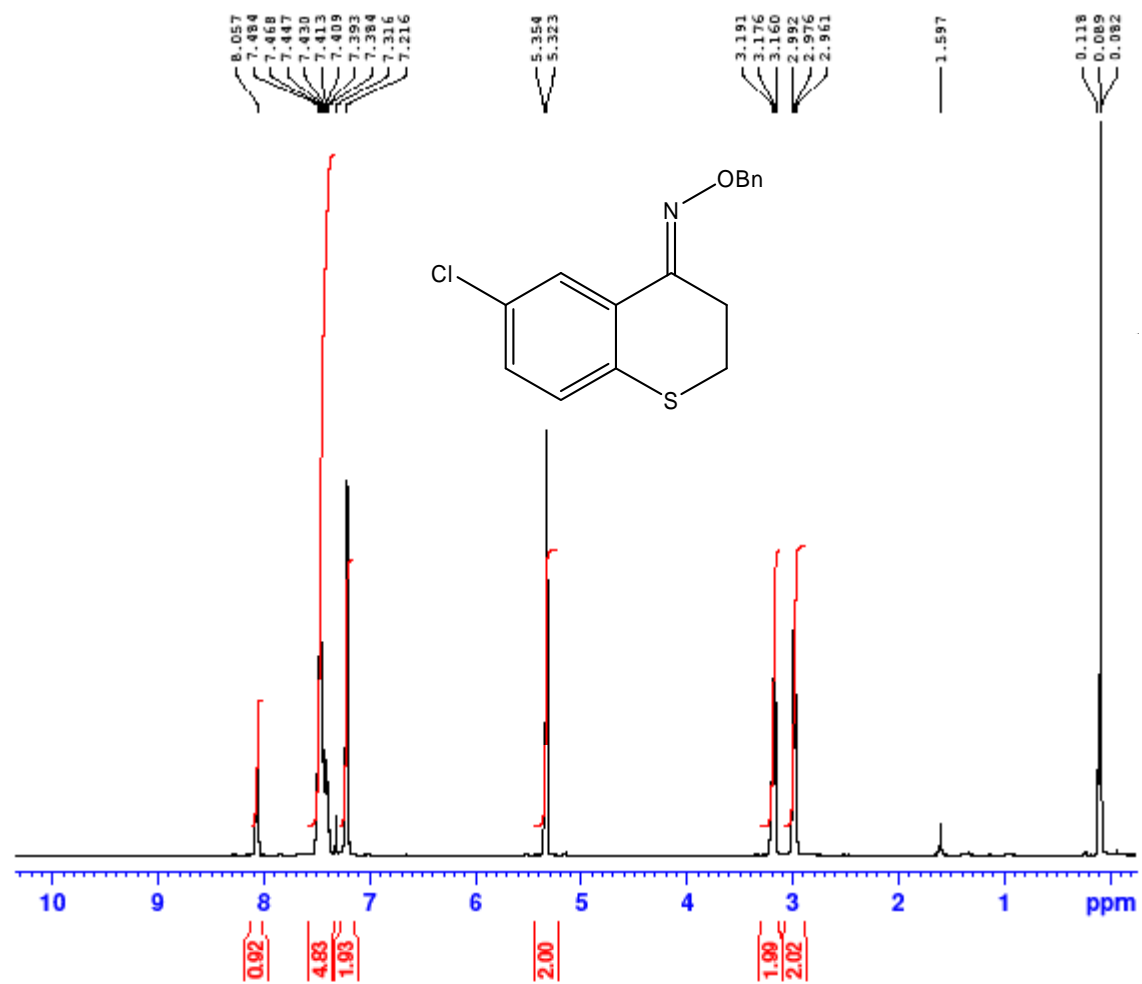

**(E)-6-Chlorothiochroman-4-one O-benzyl oxime (15f)**

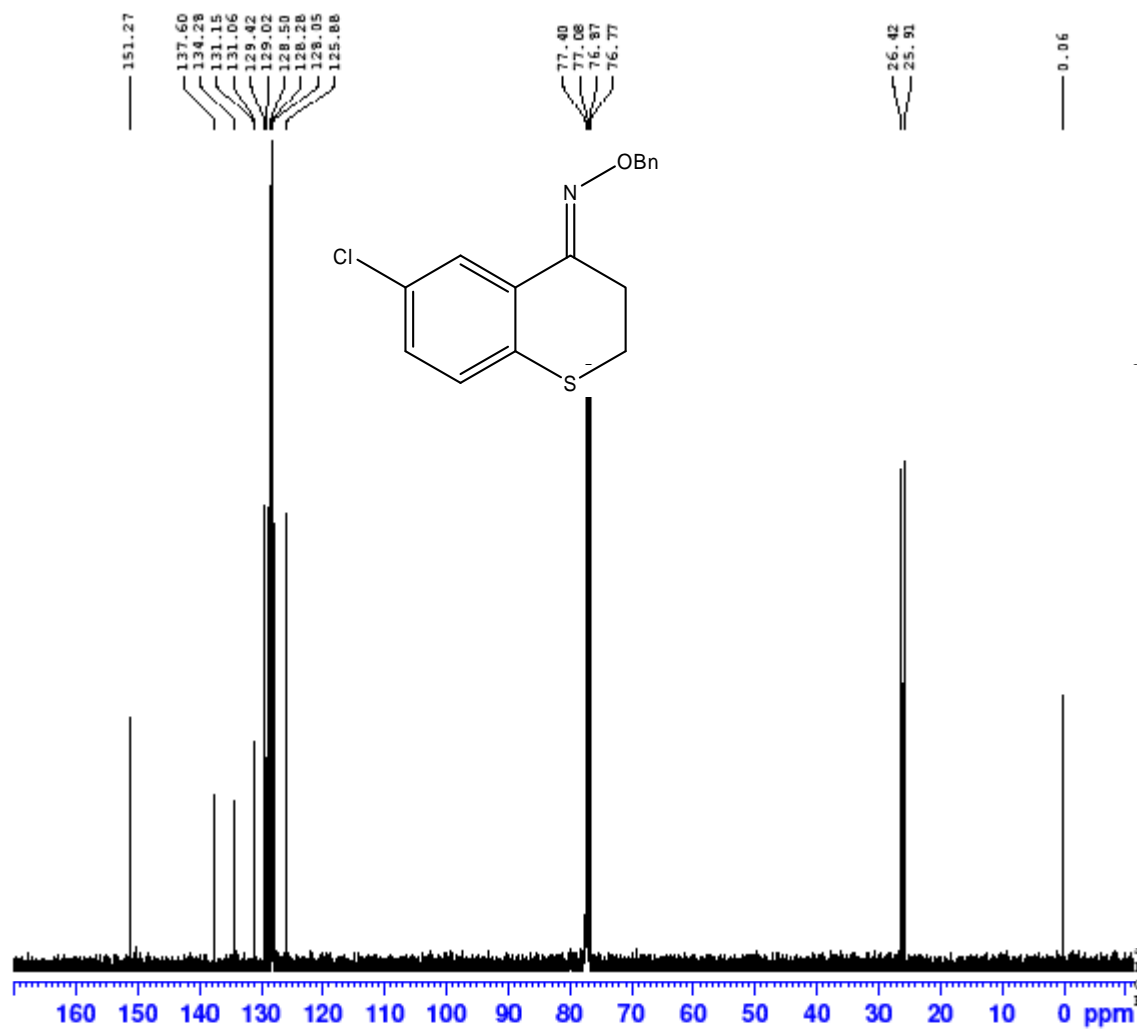

# 1-(pyridin-3-yl)ethanone O-benzyl oxime (16a)

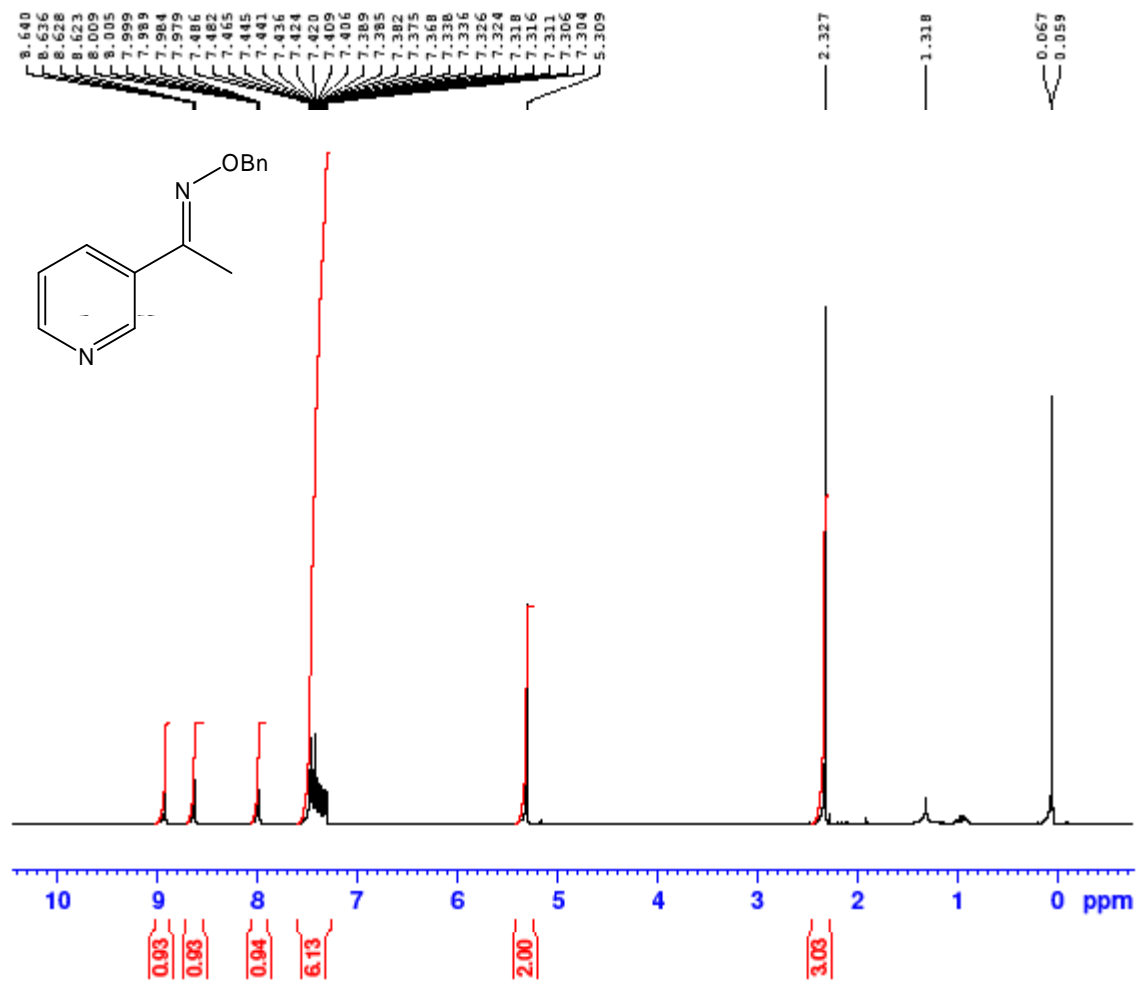

# 1-(pyridin-3-yl)ethanone O-benzyl oxime (16a)

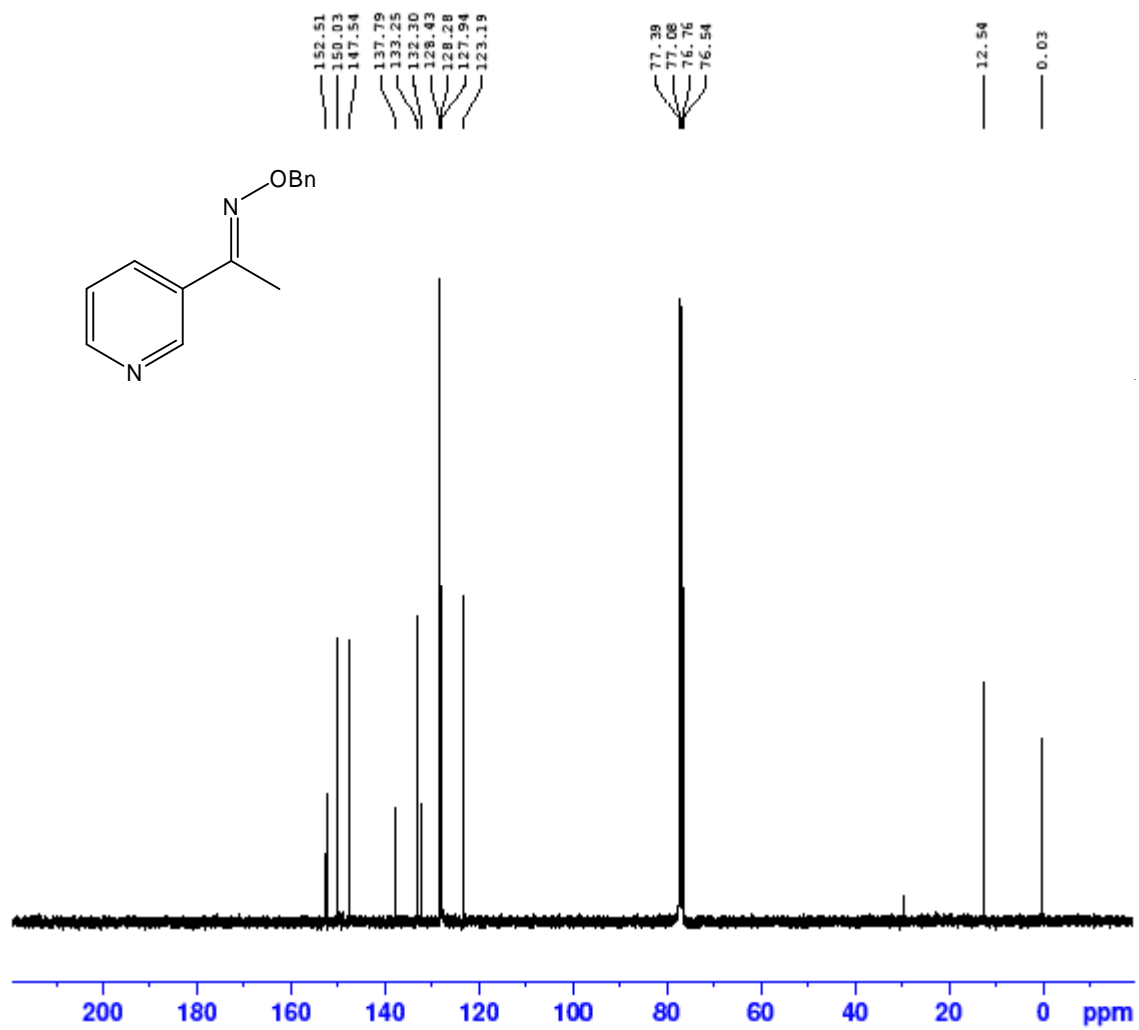

**(E)-1-(Pyridine-3-yl)-propan-1-one O-benzyl oxime (16b)**

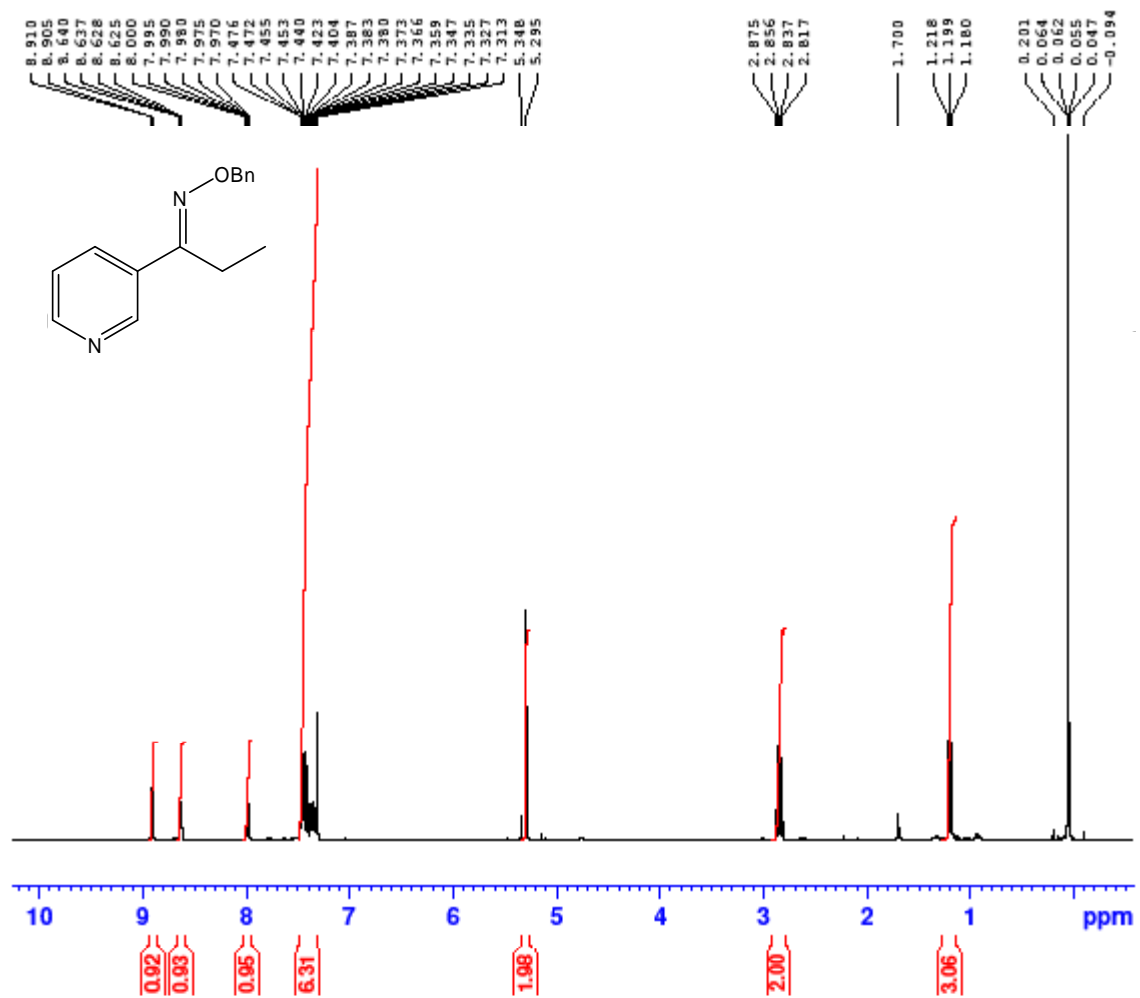

**(E)-1-(Pyridine-3-yl)propan-1-one O-benzyl oxime (16b)**

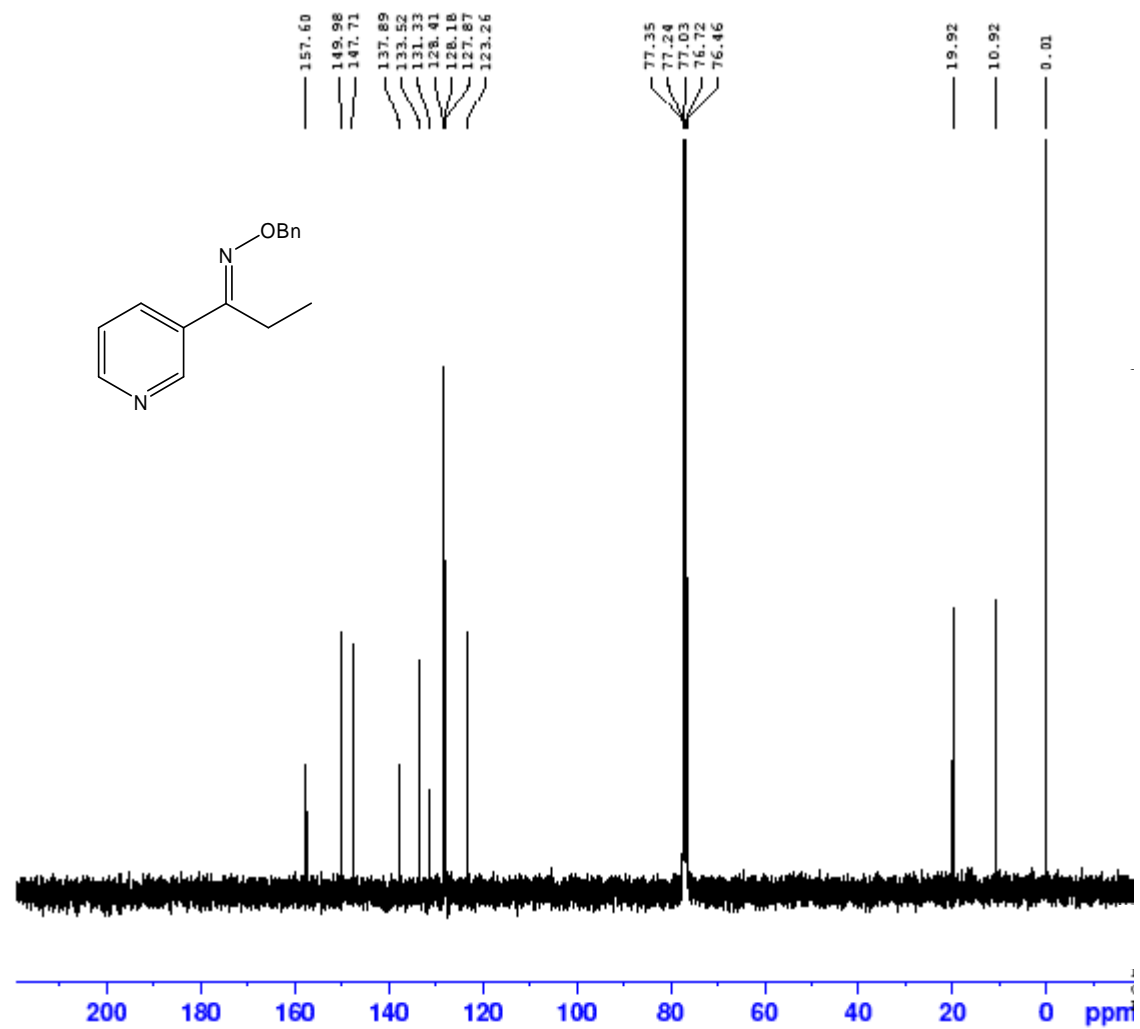

**(E)-1-(6-Methoxypyridin-3-yl)-ethanone O-benzyl oxime (16c)**

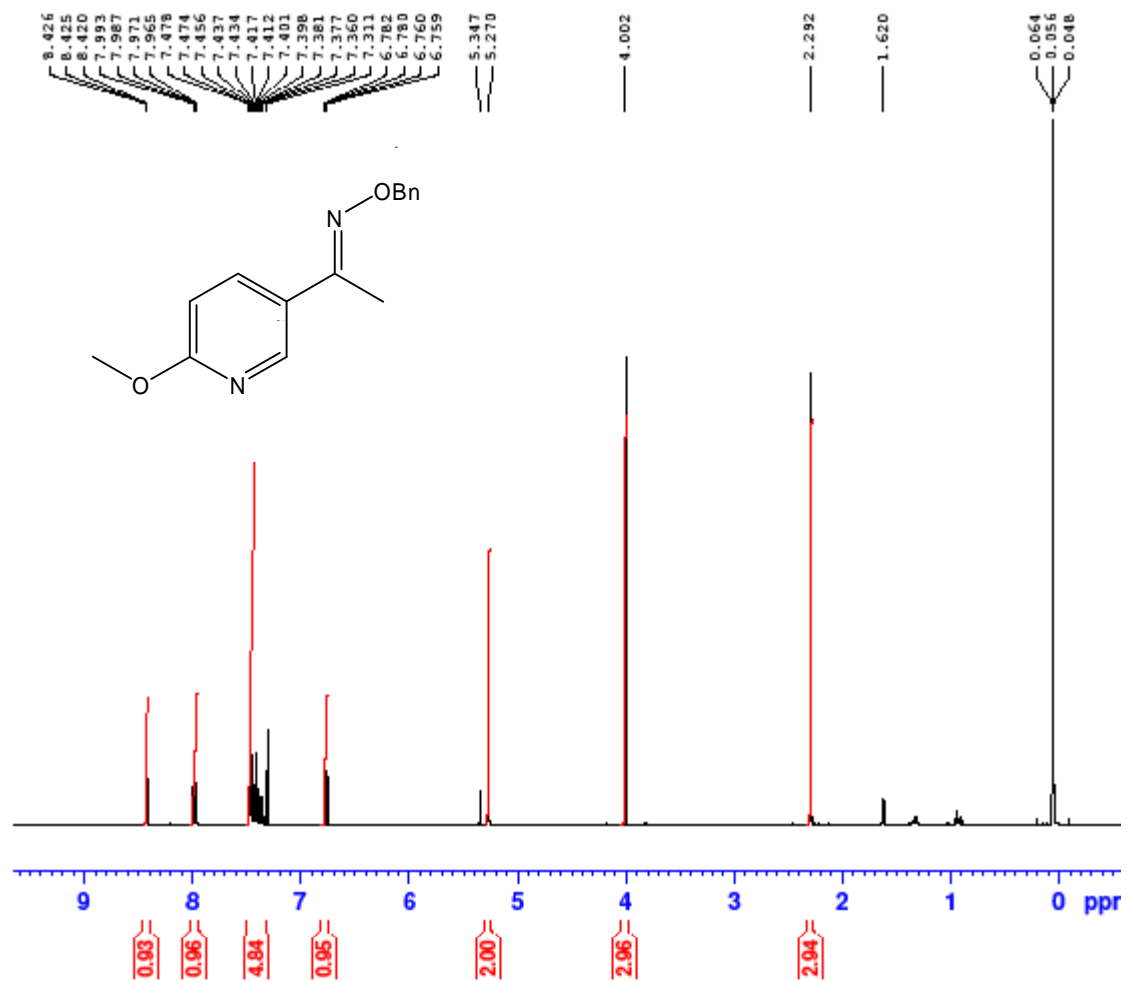

**(E)-1-(6-Methoxypyridin-3-yl)-ethanone O-benzyl oxime (16c)**

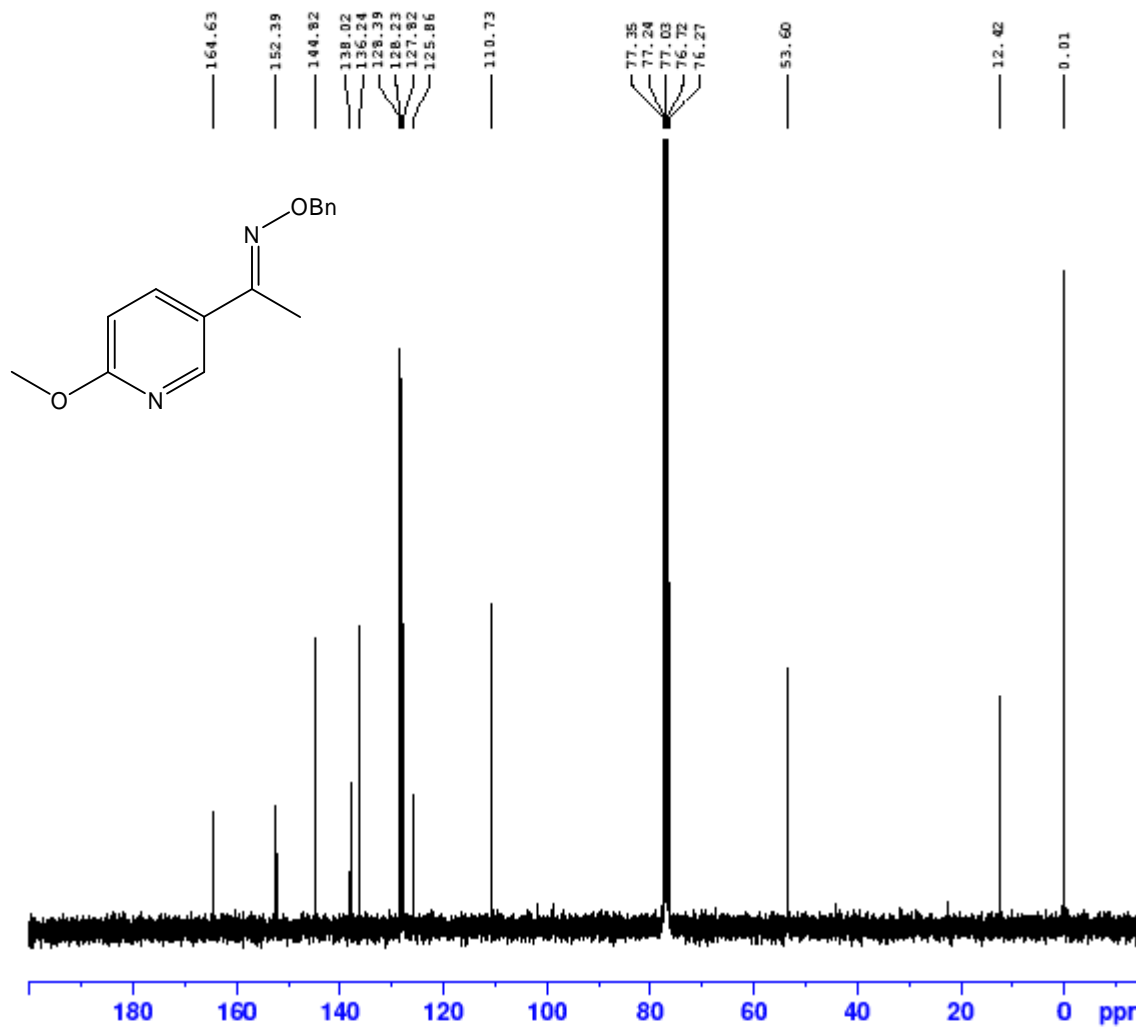



**(E)-Cyclopropyl-(pyridine-3-yl)-methanone O-benzyl oxime (16d)**

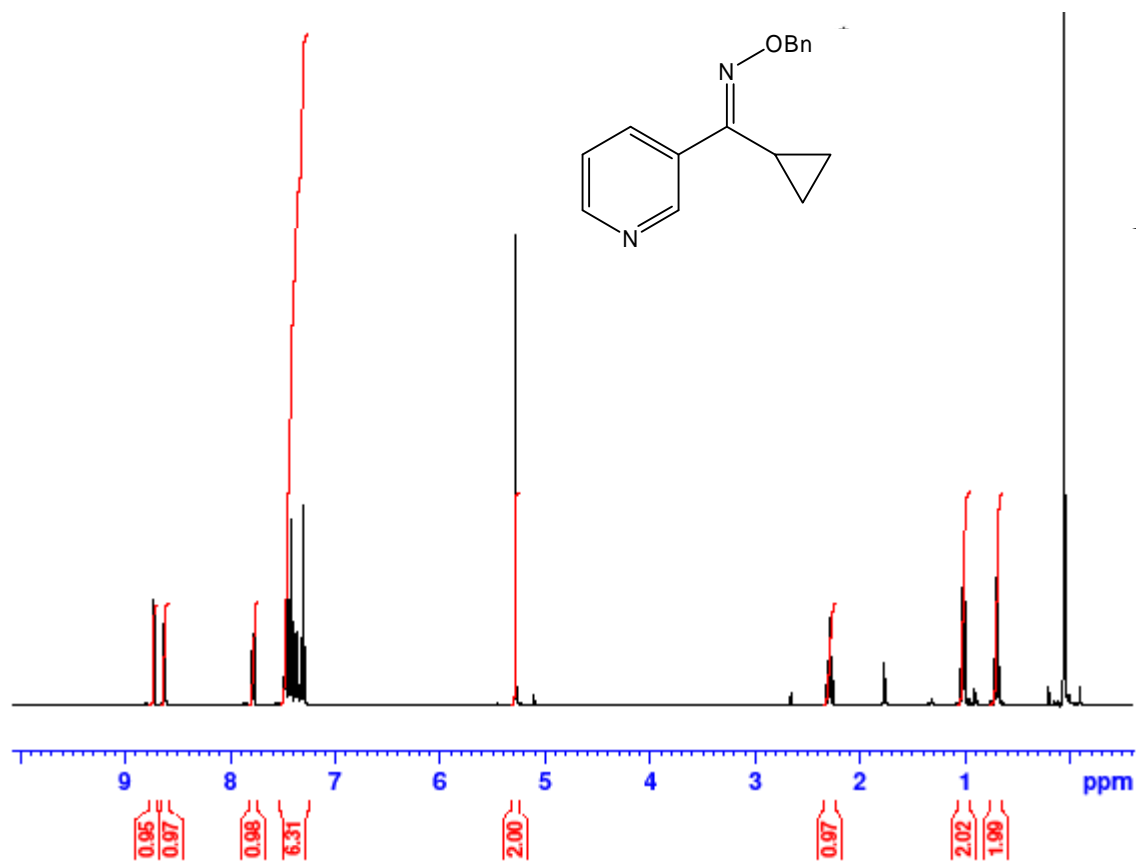

**(E)-Cyclopropyl-(pyridine-3-yl)-methanone O-benzyl oxime (16d)**

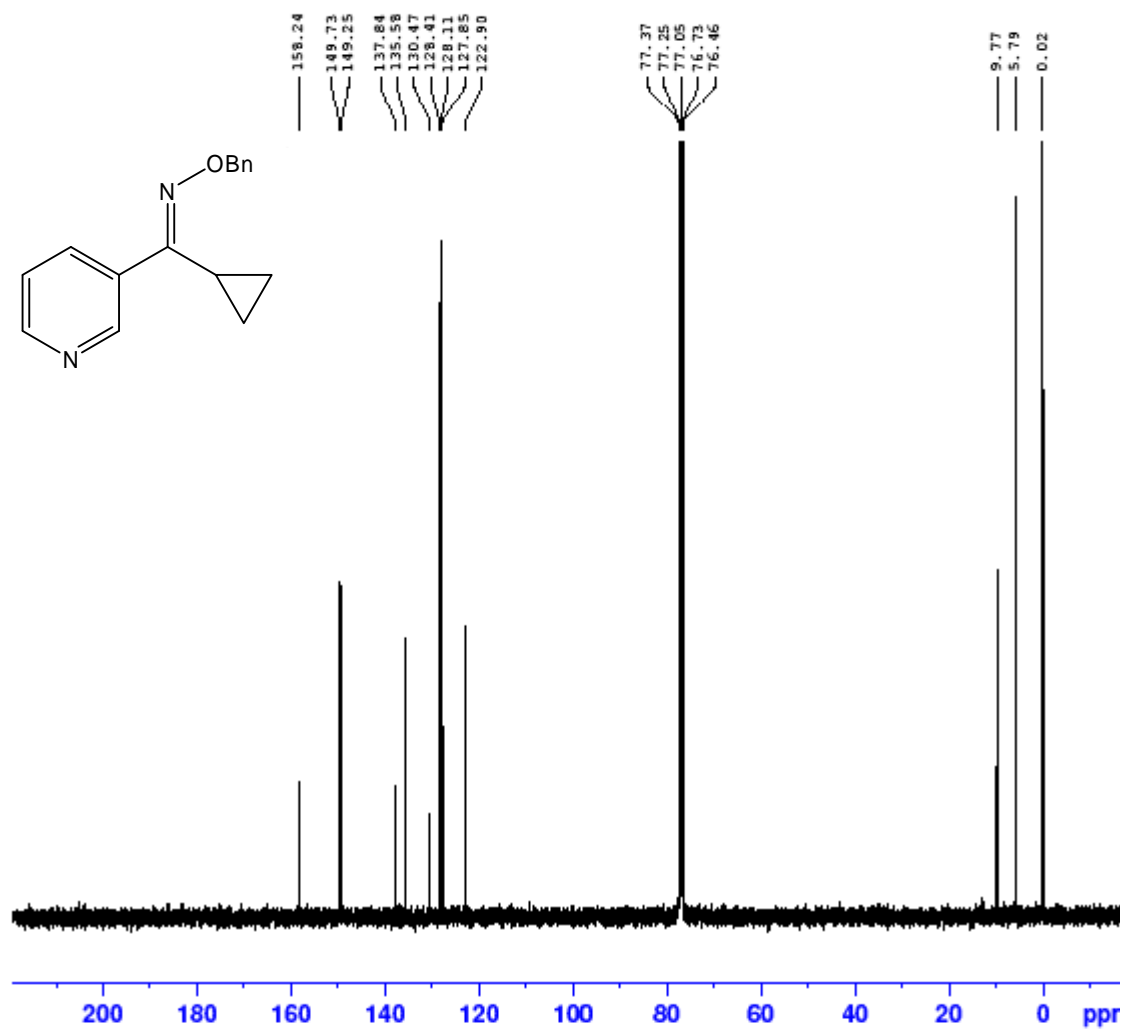

**(E)-phenyl(pyridin-3-yl)methanone O-benzyl oxime (17)**

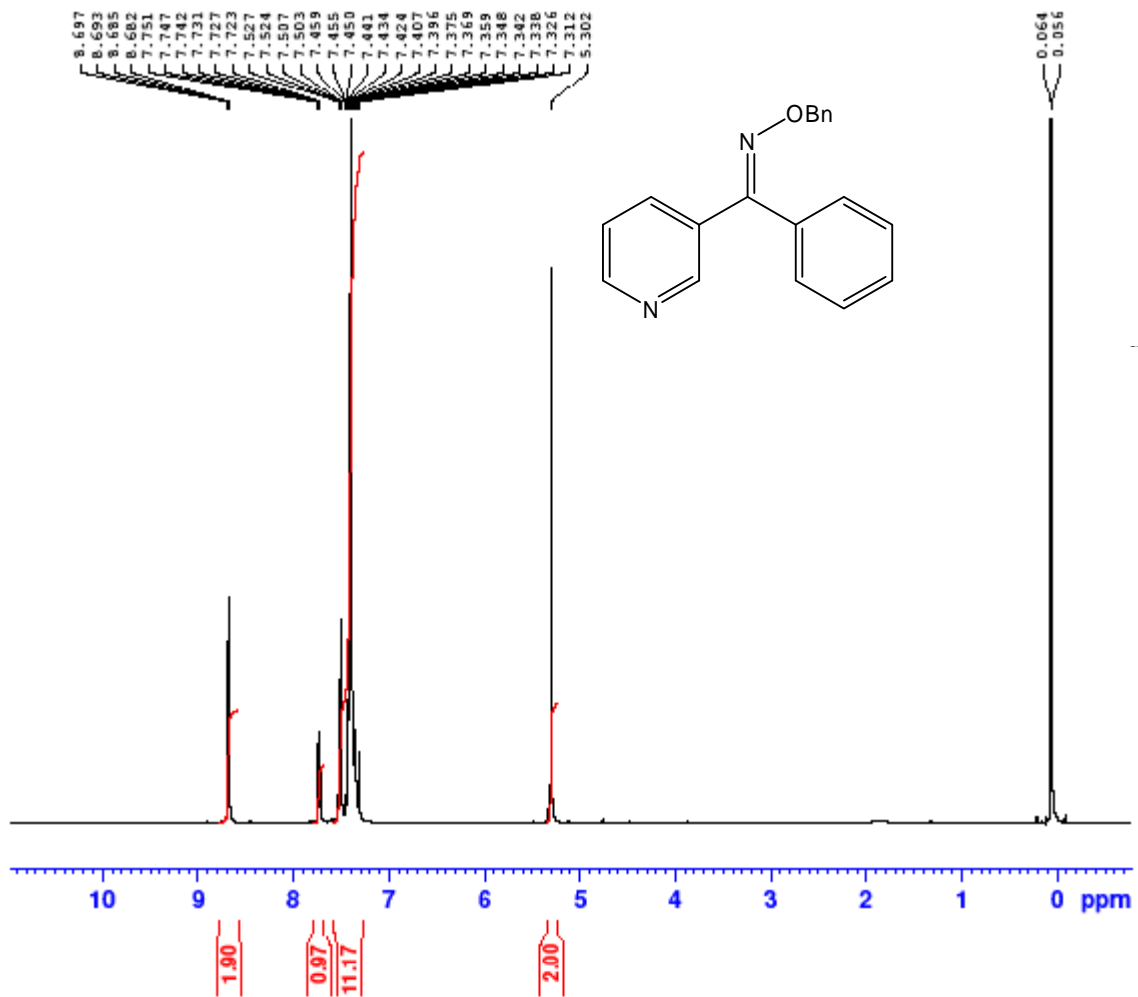

**(E)-phenyl(pyridin-3-yl)methanone O-benzyl oxime (17)**

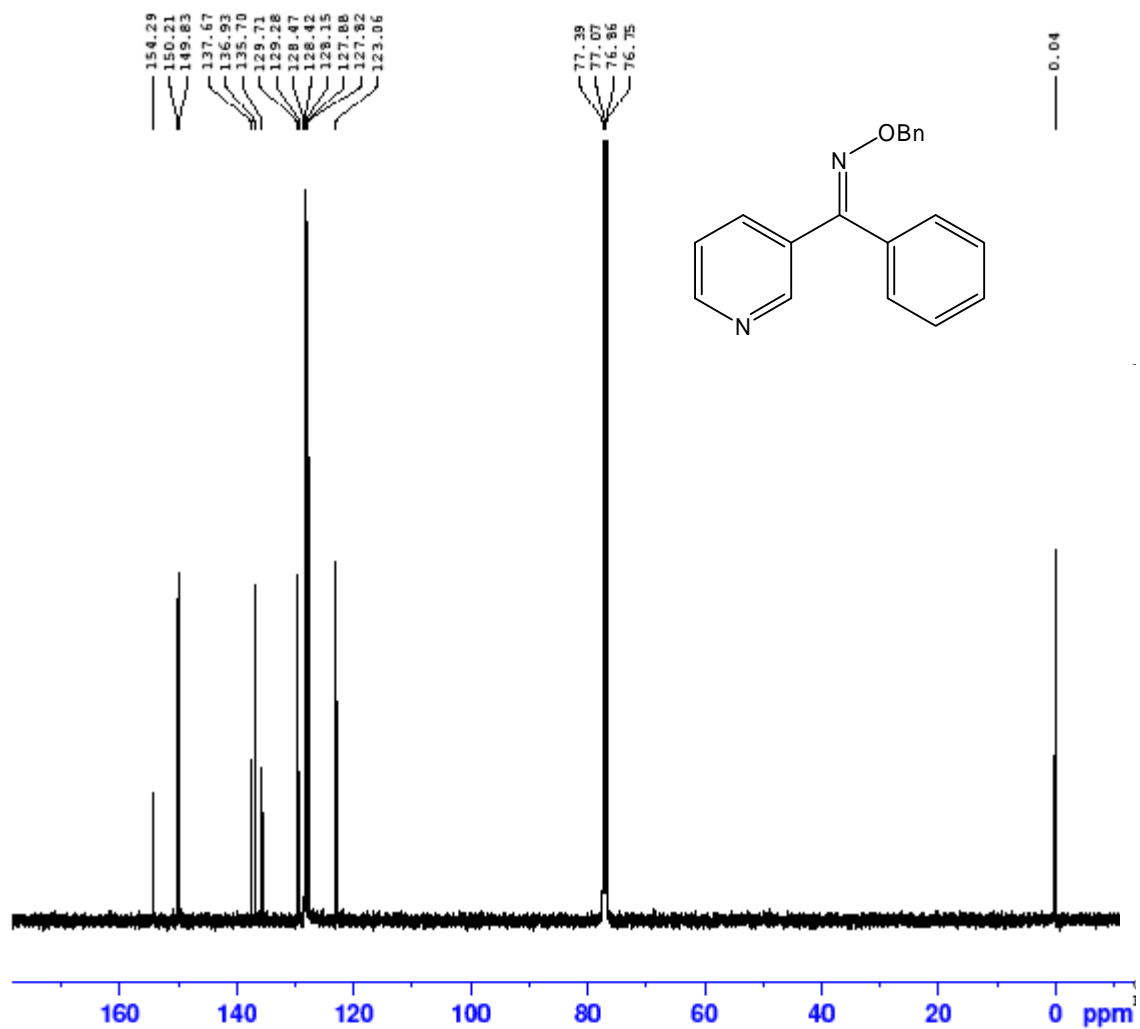

# 1-(pyridin-4-yl)ethanone O-benzyl oxime (18a)

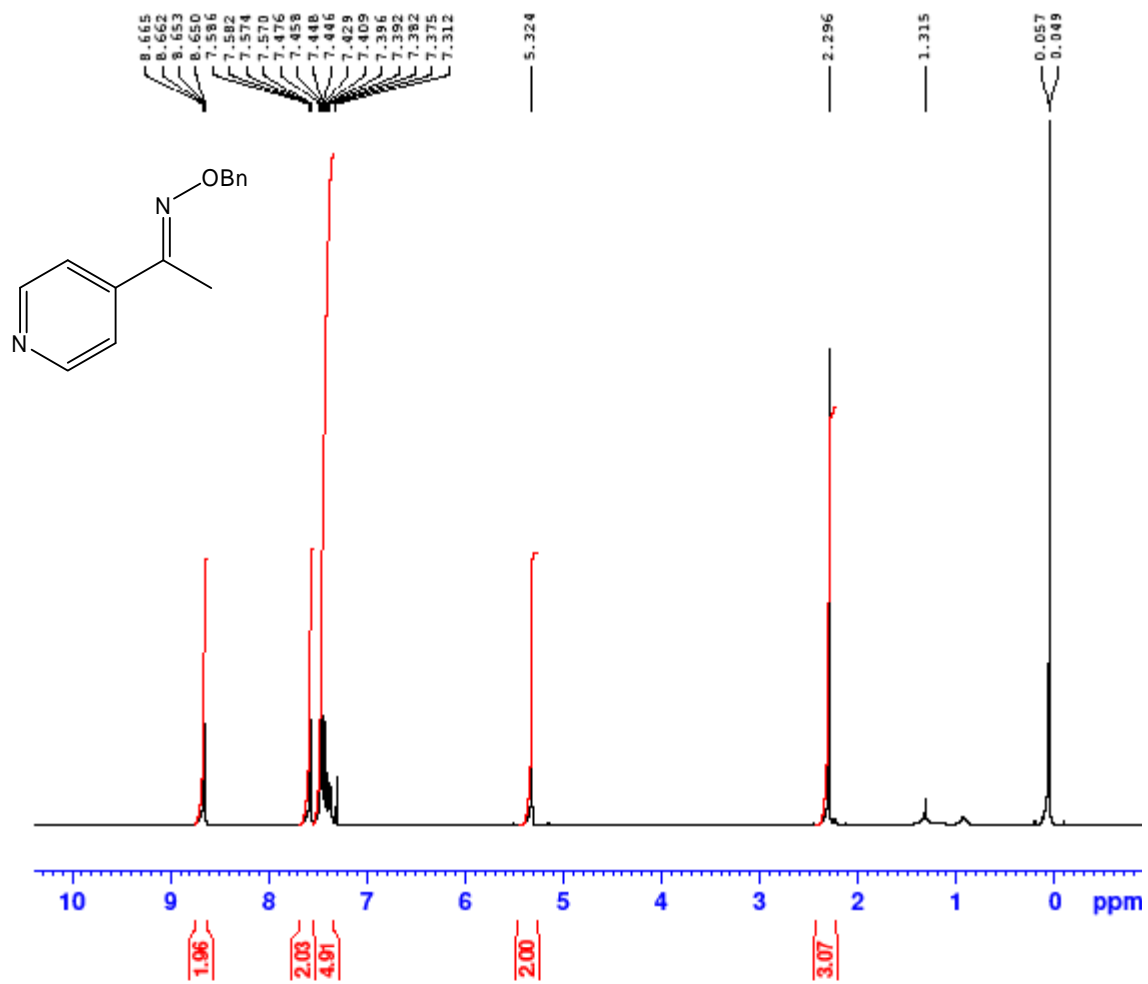

# 1-(pyridin-4-yl)ethanone O-benzyl oxime (18a)

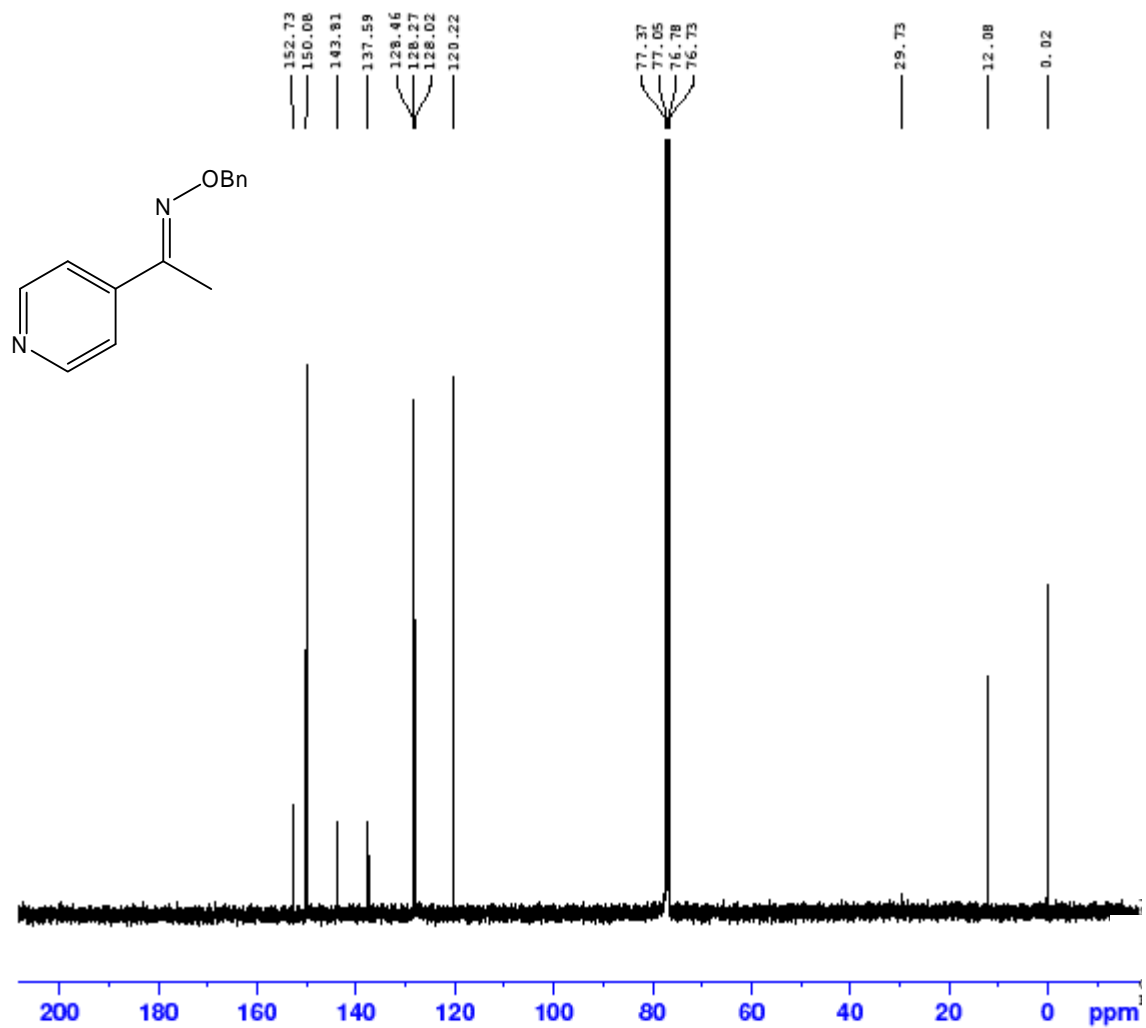

**(E)-1-(Pyridine-4-yl)-propan-1-one O-benzyl oxime (18b)**

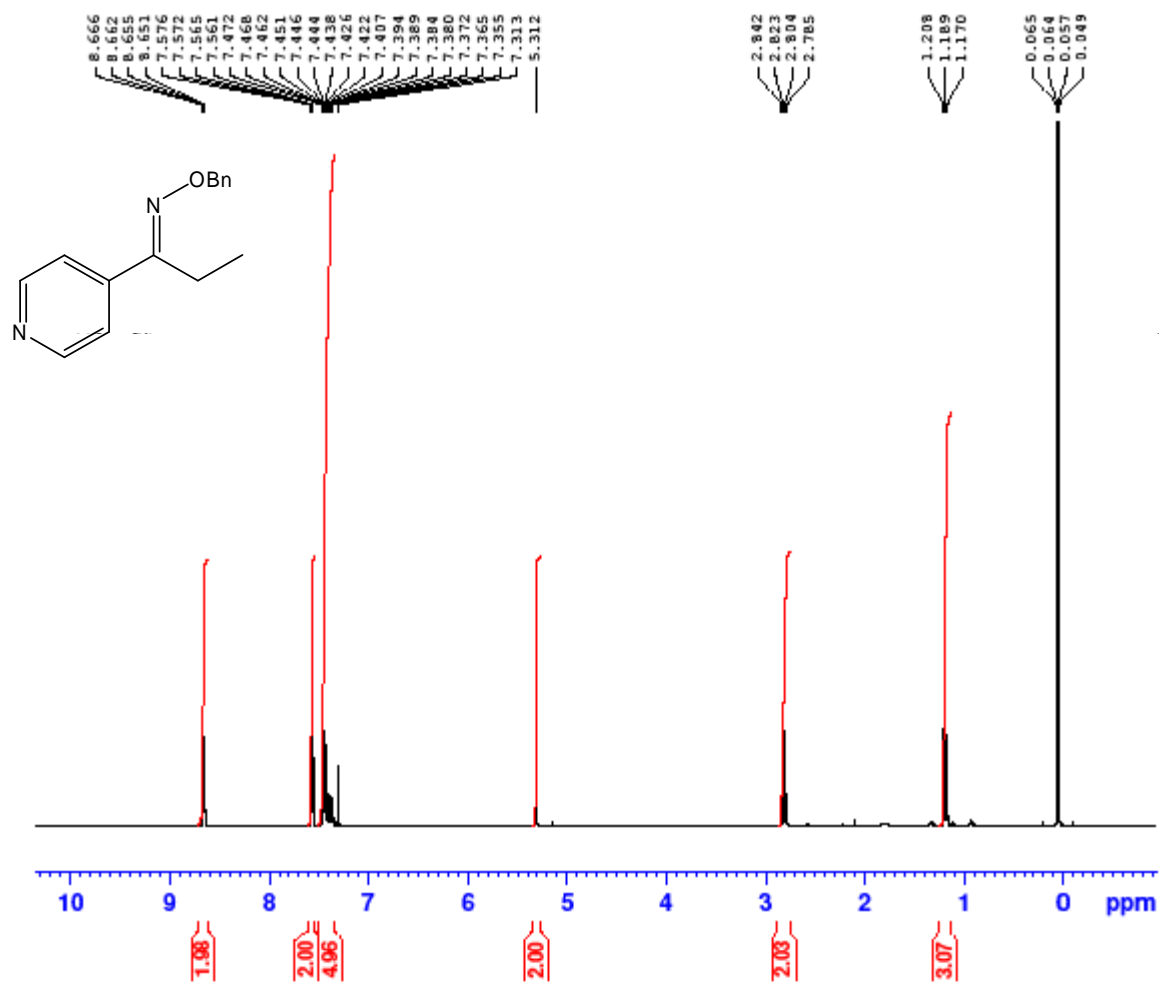

**(E)-1-(Pyridine-4-yl)-propan-1-one O-benzyl oxime (18b)**

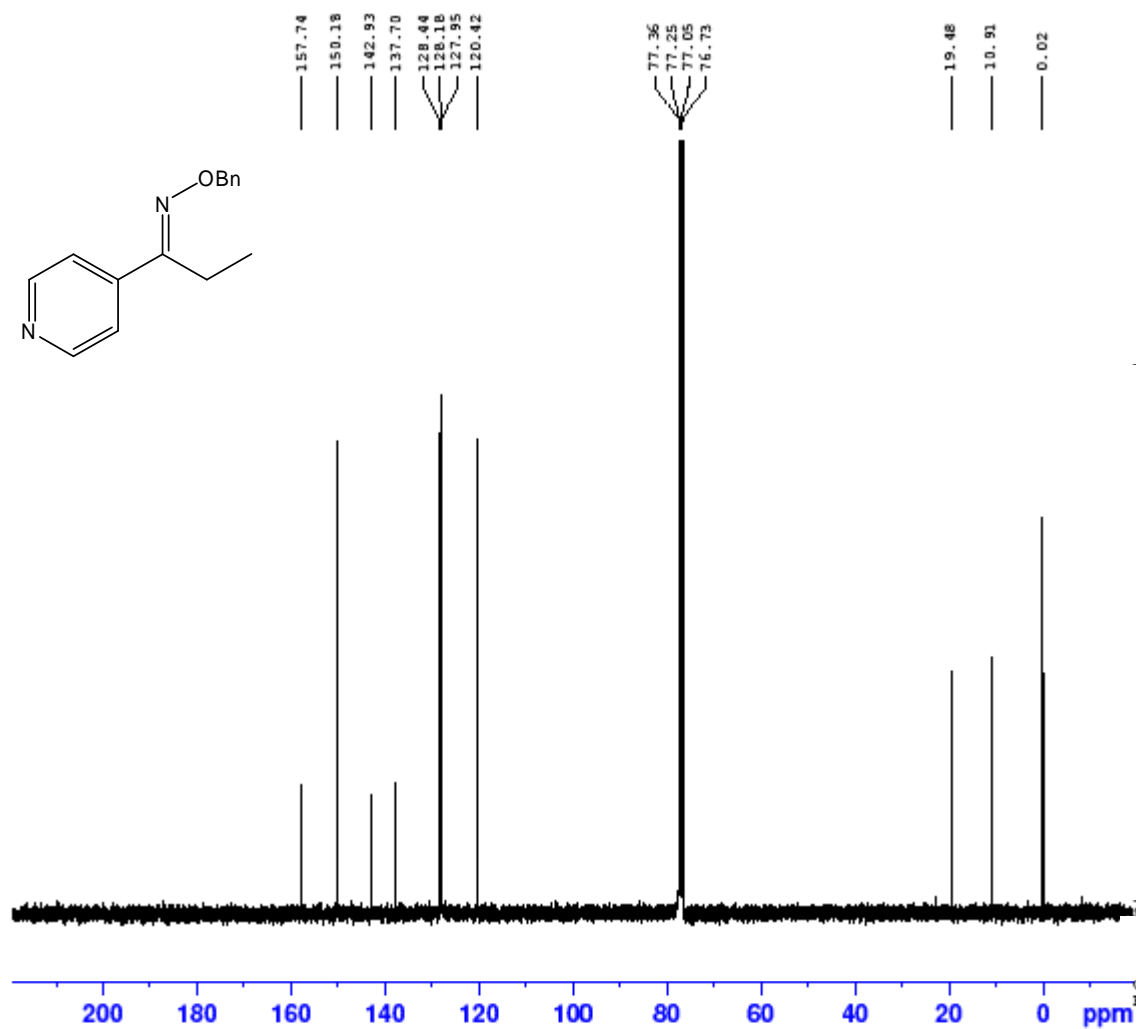



**(E)-Cyclopropyl-(pyridine-4-yl)-methanone O-benzyl oxime (18c<sub>E</sub>)**

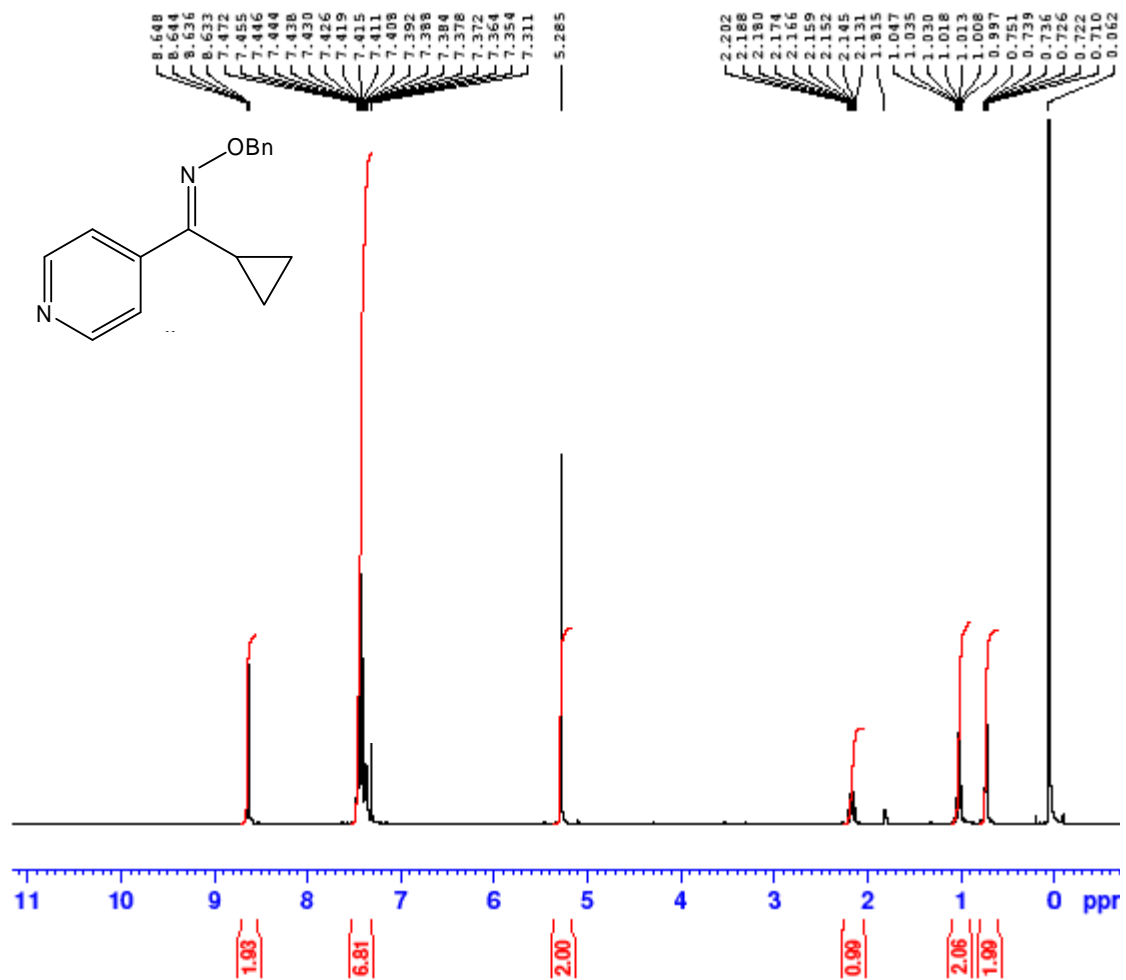

**(E)-Cyclopropyl-(pyridine-4-yl)-methanone O-benzyl oxime (18c<sub>E</sub>)**

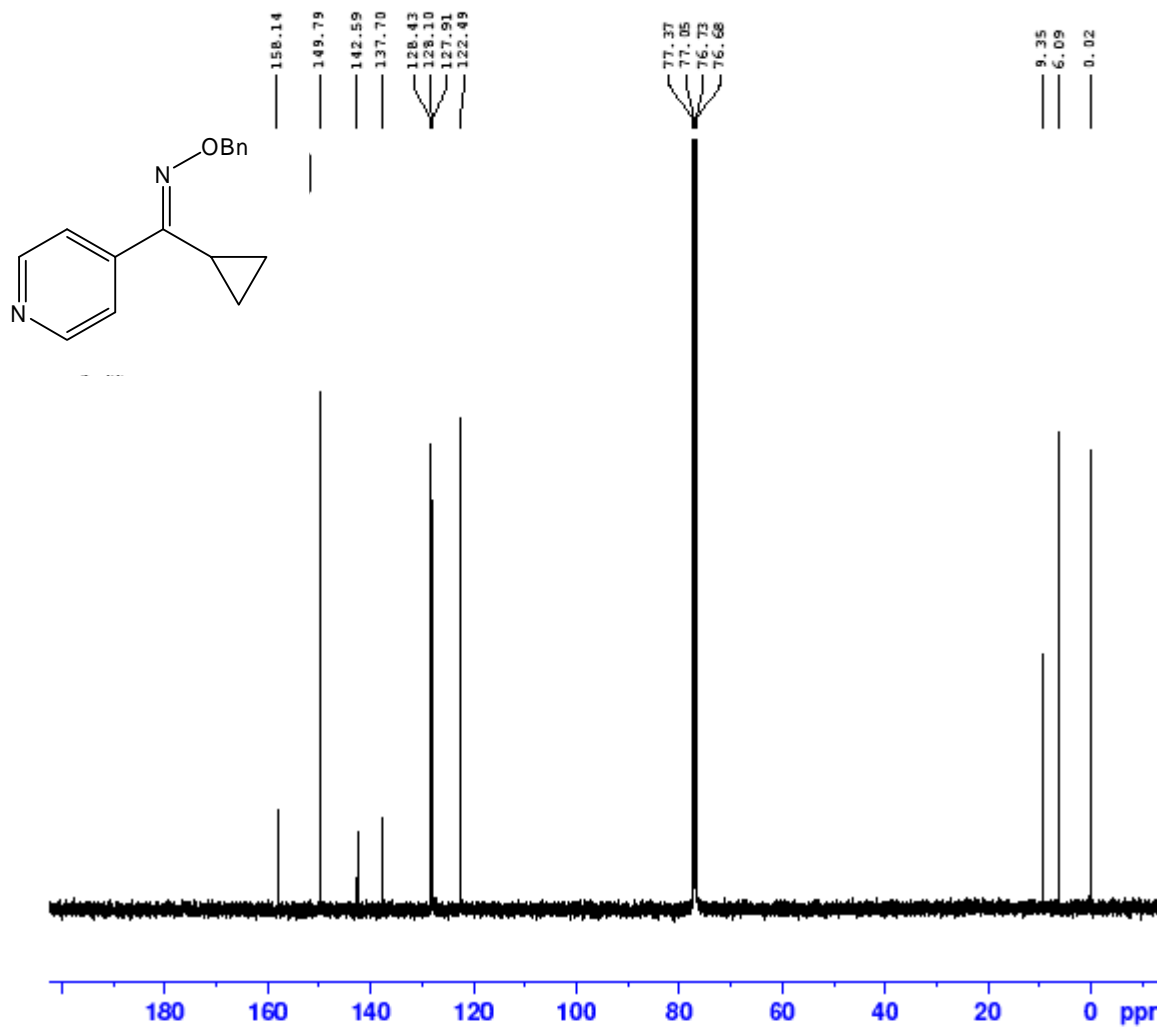

**(Z)-Cyclopropyl-(pyridine-4-yl)-methanone O-benzyl oxime (18c<sub>2</sub>)**

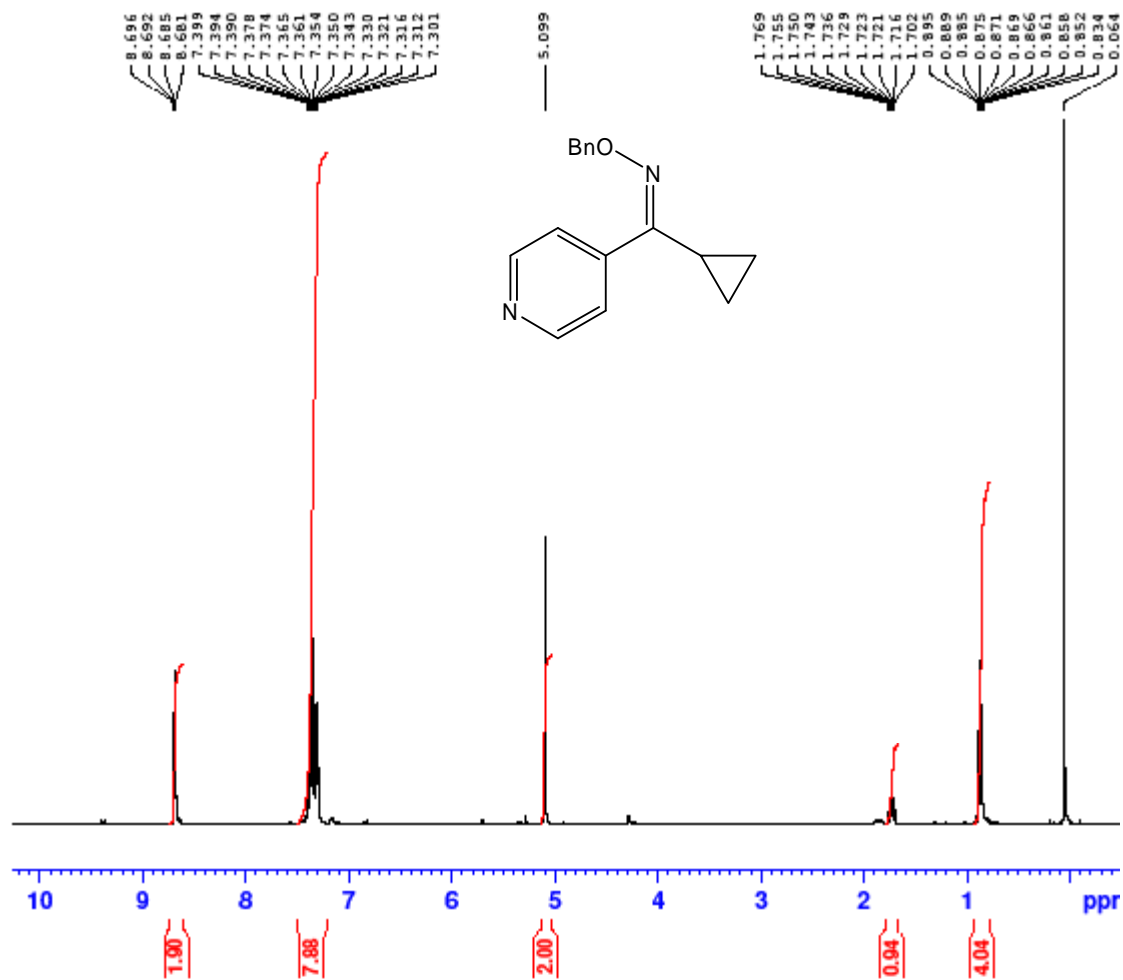

**(Z)-Cyclopropyl-(pyridine-4-yl)-methanone O-benzyl oxime (18c<sub>2</sub>)**

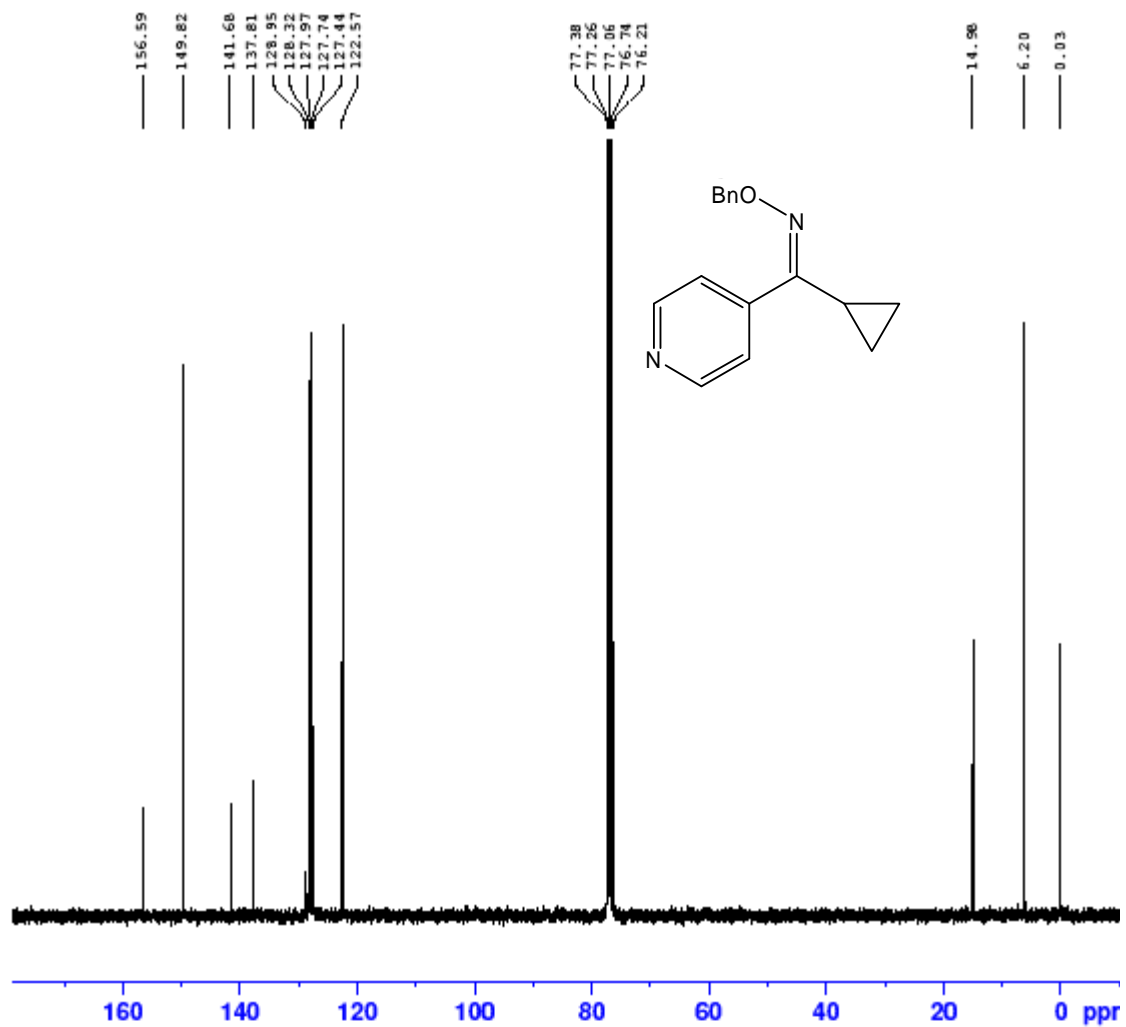

**(E)-1-(pyridine-3yl)-4-(triisopropylsilyloxy)butan-1-one O-benzoyloxime (19)**

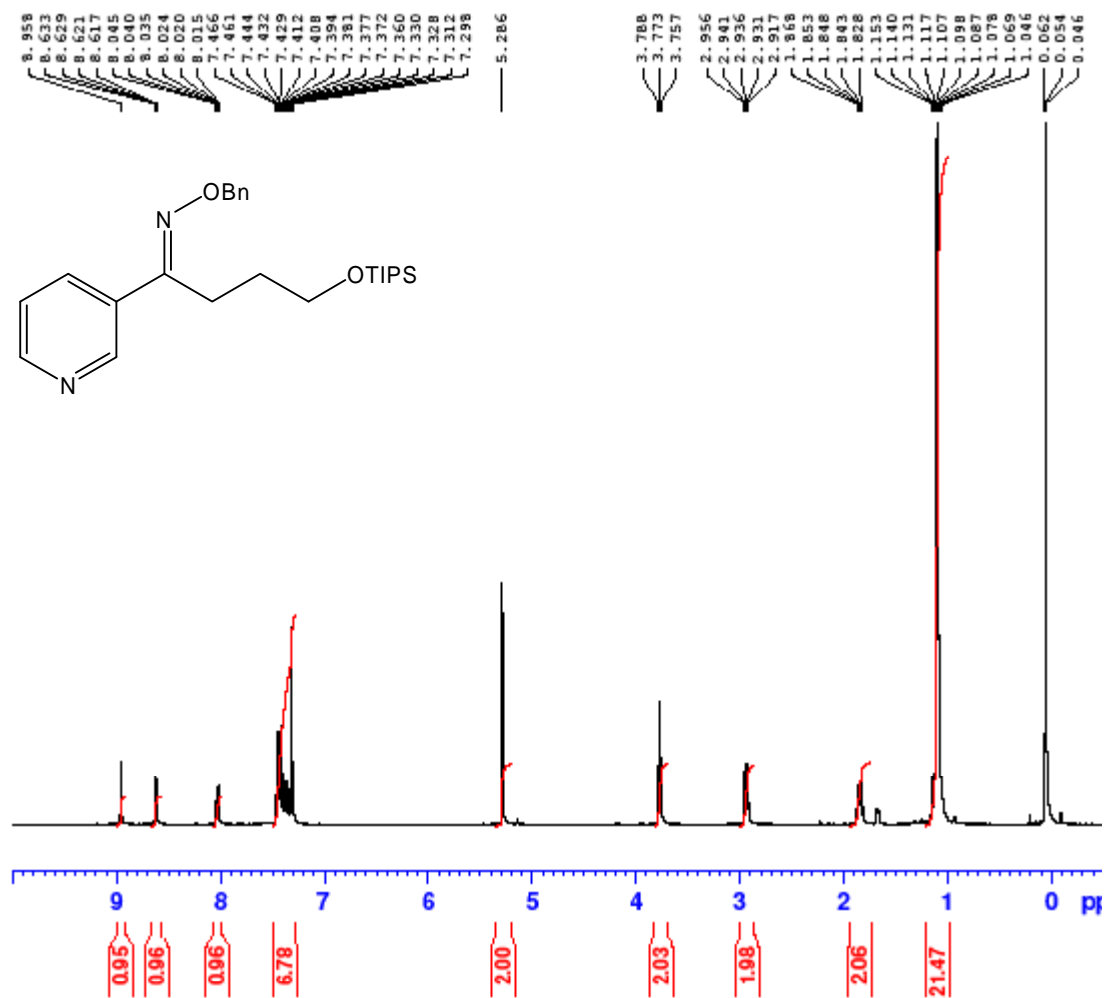

**(E)-1-(pyridine-3-yl)-4-(triisopropylsilyloxy)butan-1-one O-benzoyloxime (19)**

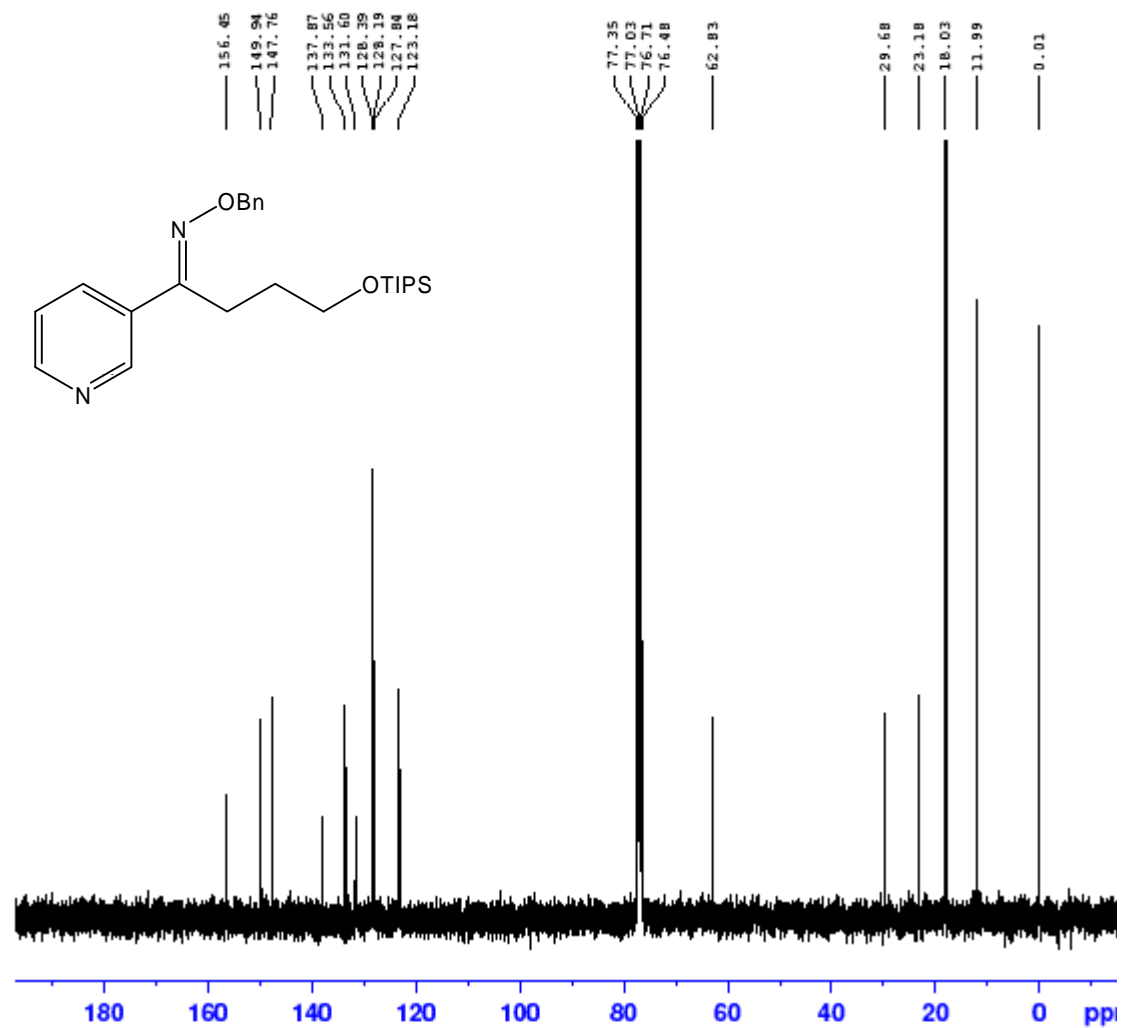

**(S)-N-(1-(thiophen-3-yl)ethyl)acetamide (20a)**

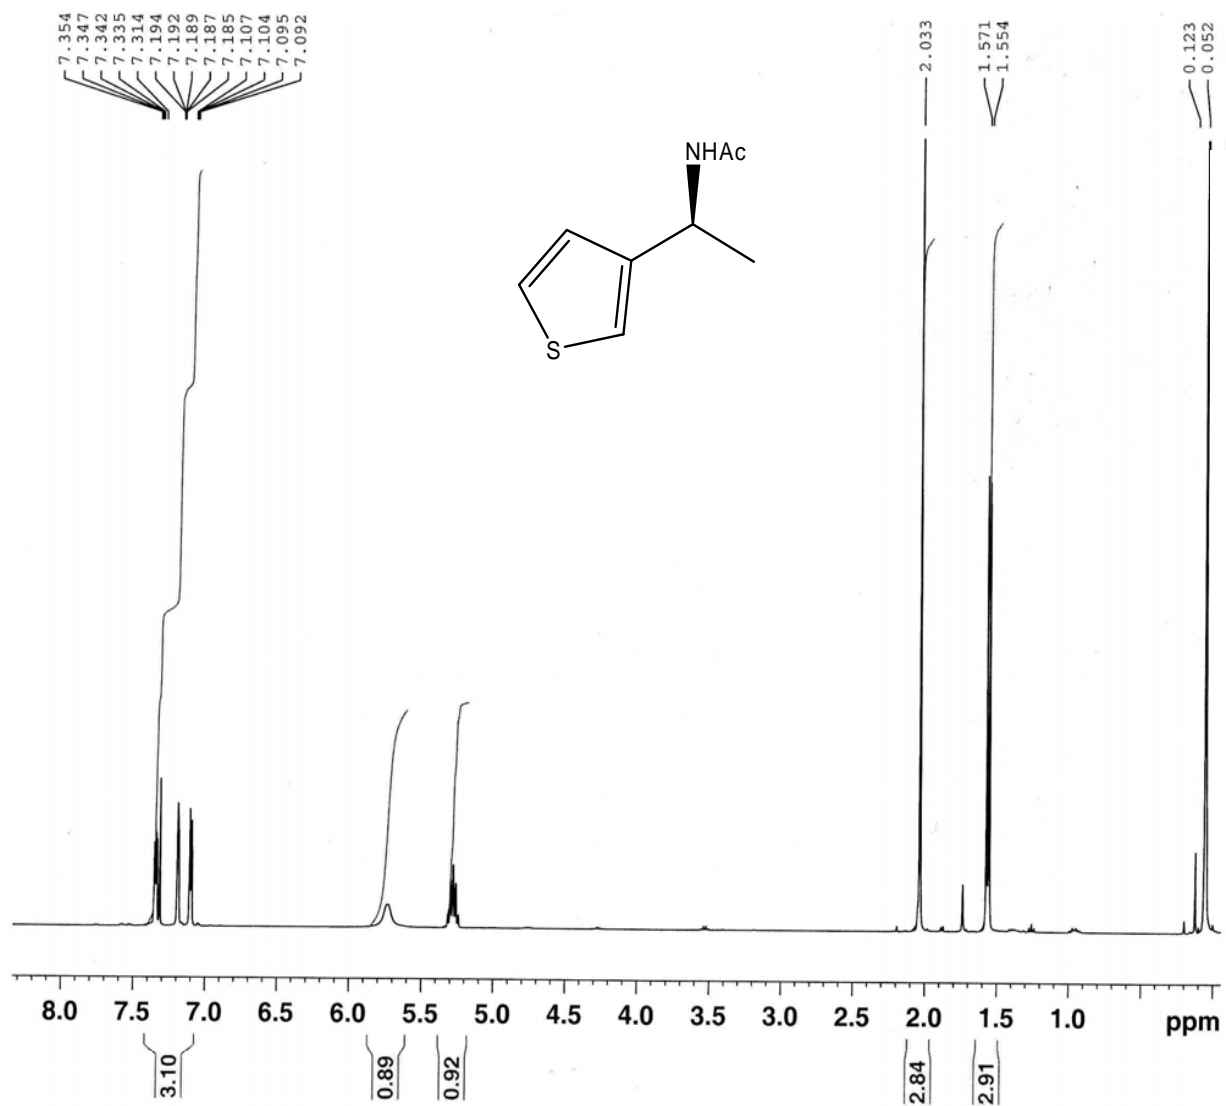

**(S)-N-(1-(thiophen-3-yl)ethyl)acetamide (20a)**

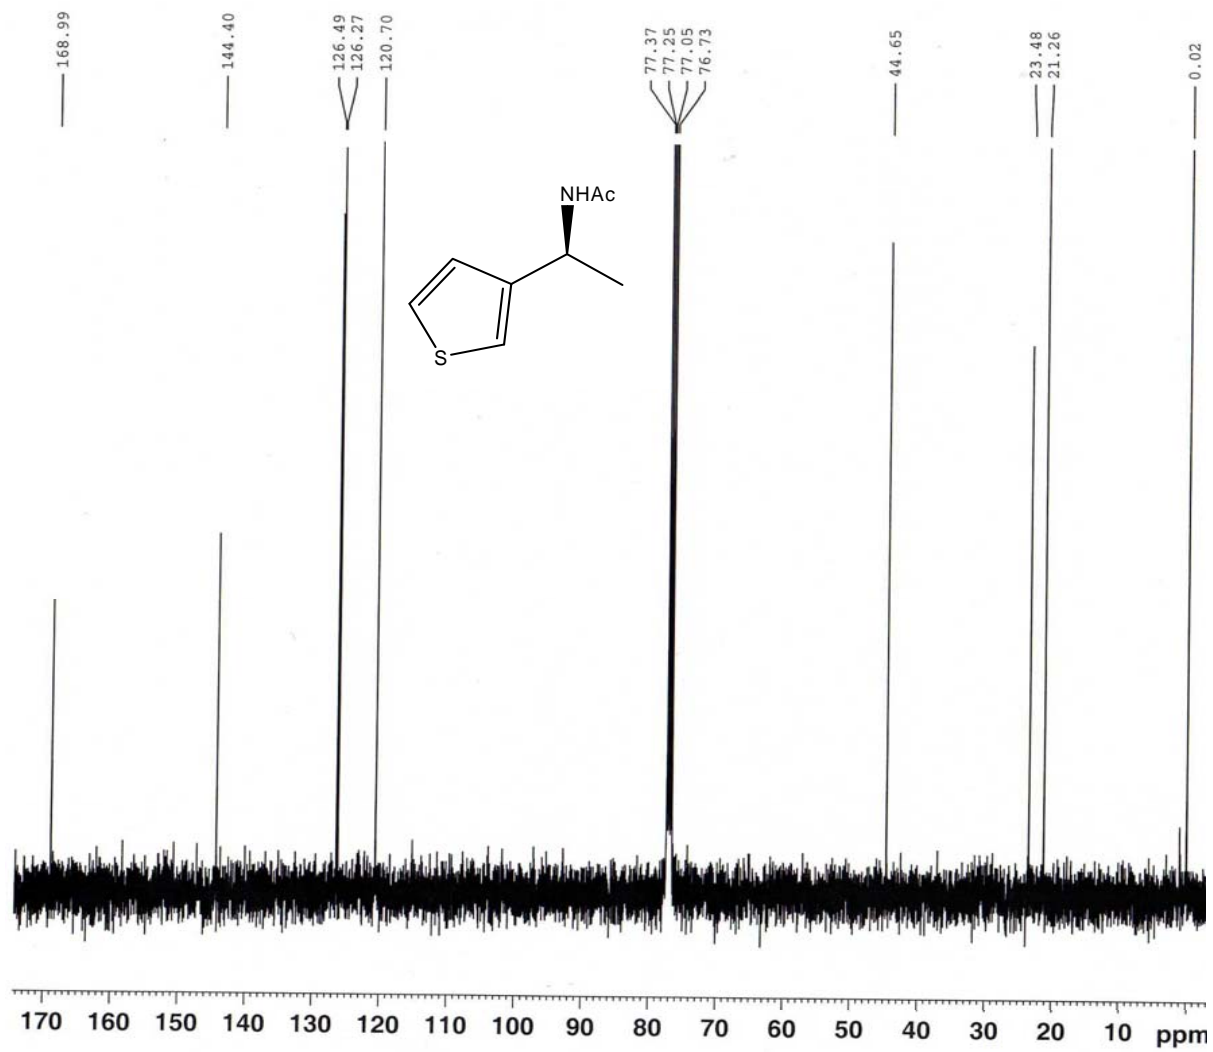



## (S)-N-(1-(thiophen-3-yl)ethyl)acetamide (20a)

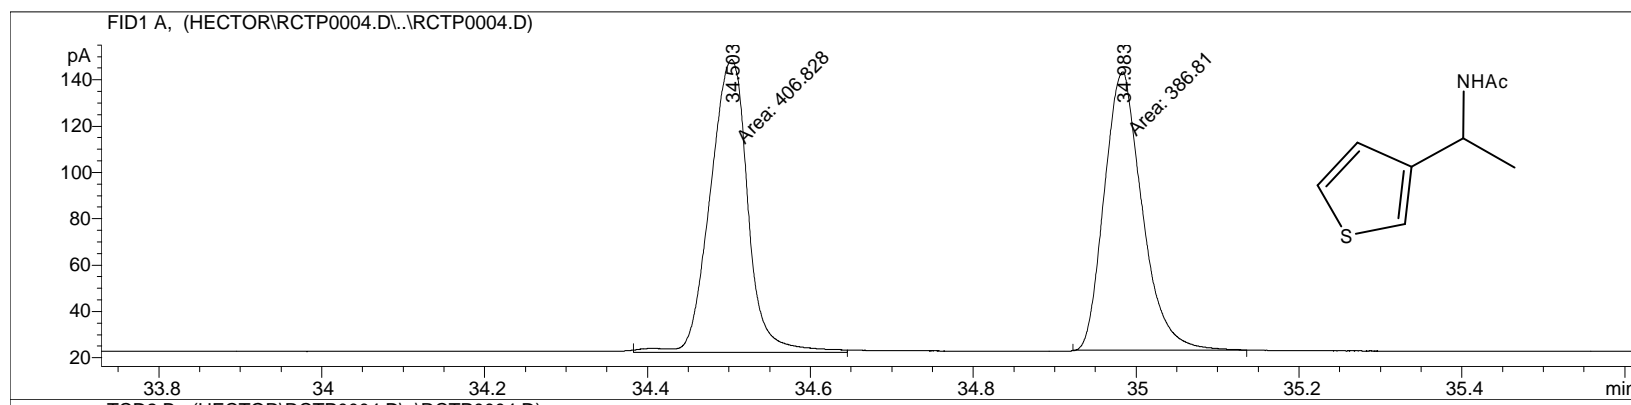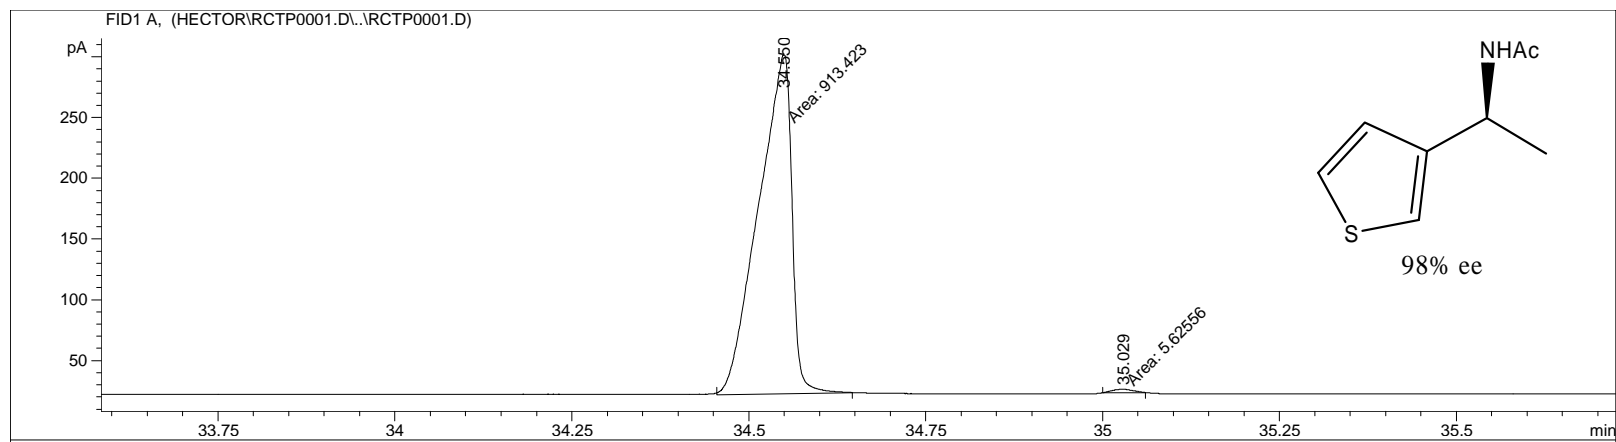

# *N*-(1-(2,5-Dimethylthiophen-3-yl)ethyl)acetamide (20b)

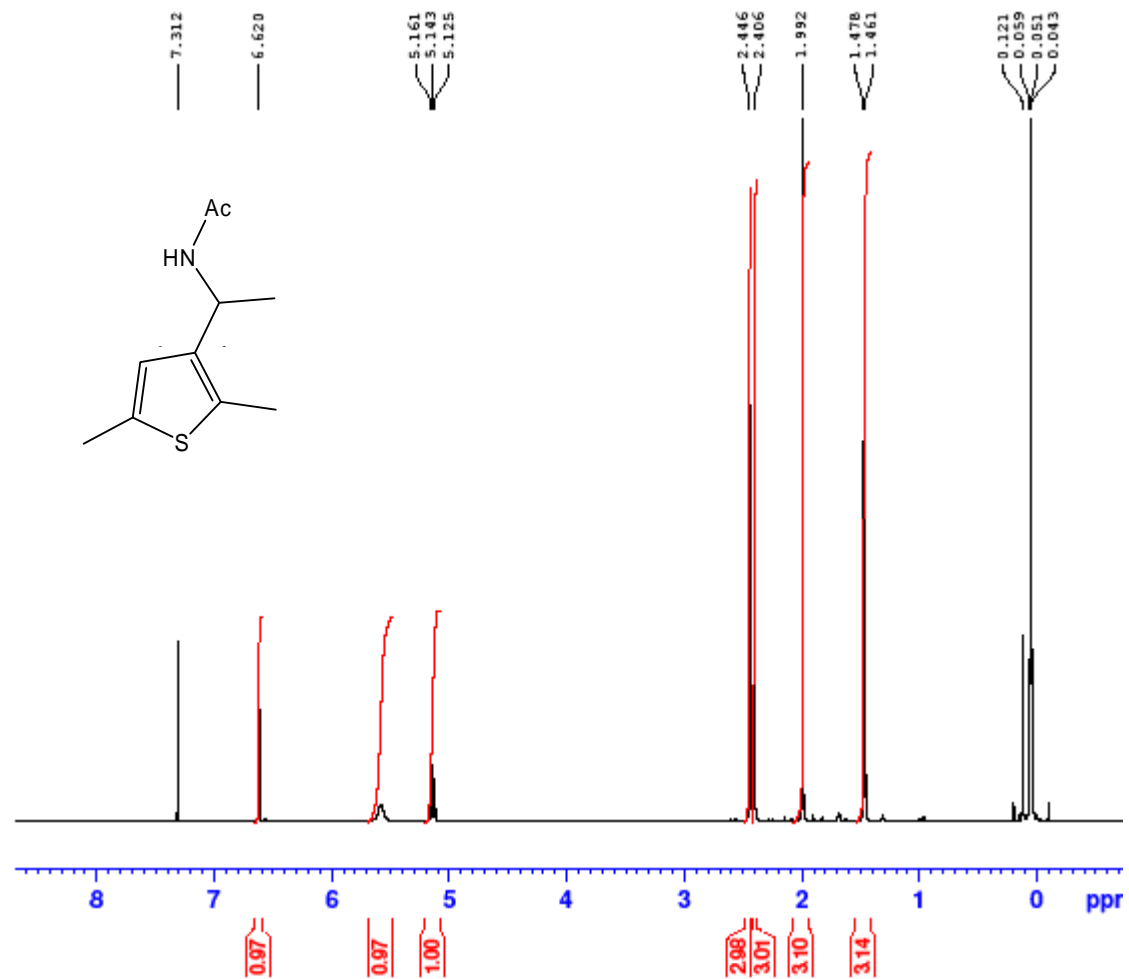

# *N*-(1-(2,5-Dimethylthiophen-3-yl)ethyl)acetamide (20b)

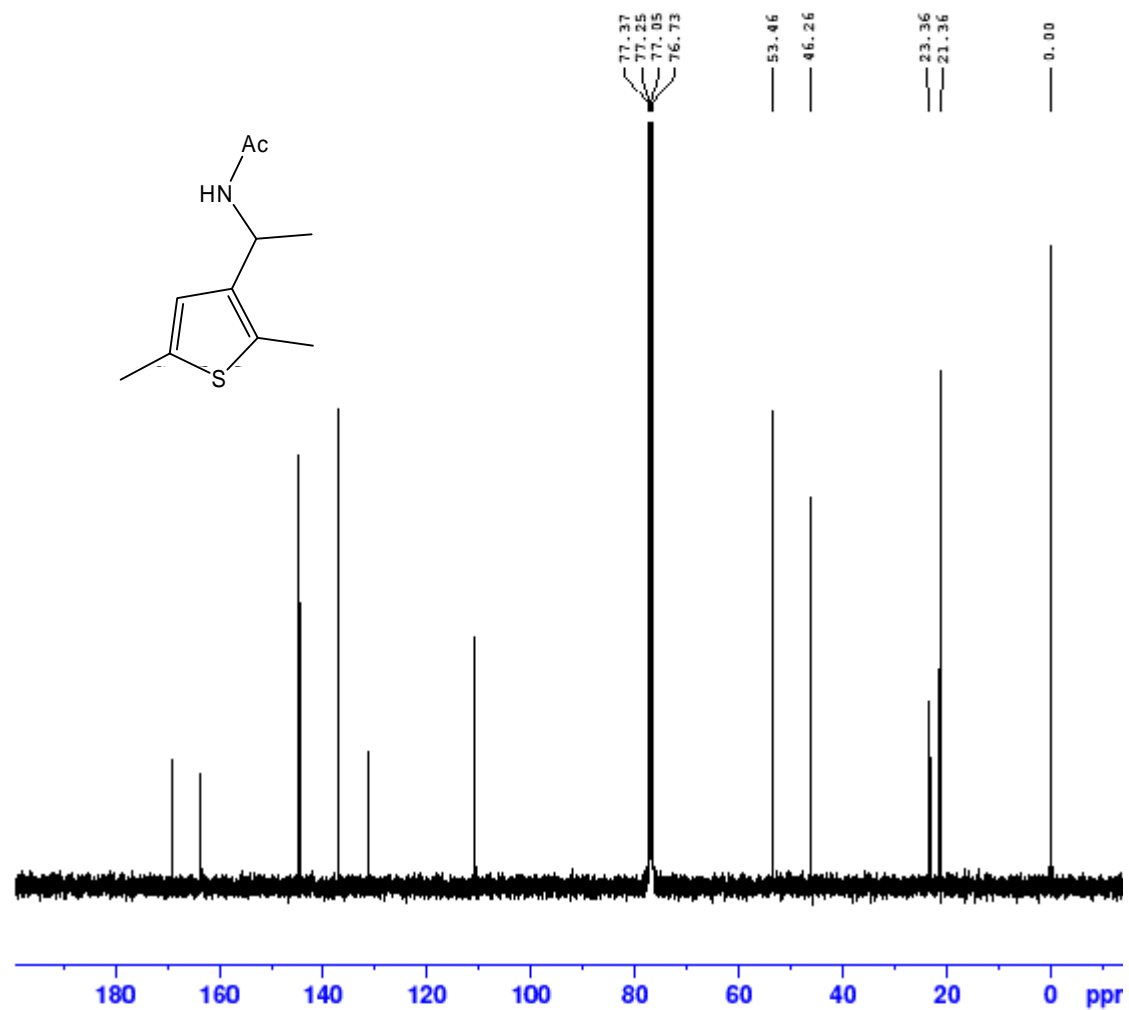

## N-(1-(2,5-Dimethylthiophen-3-yl)ethyl)acetamide (20b)

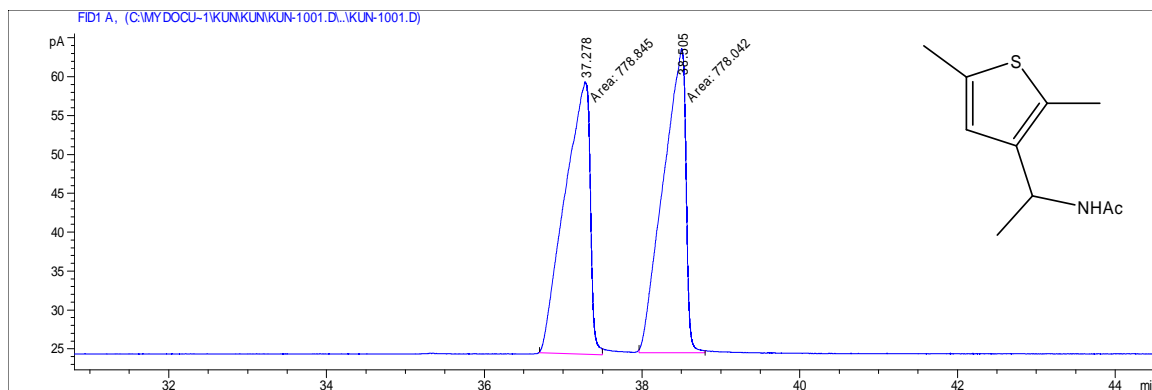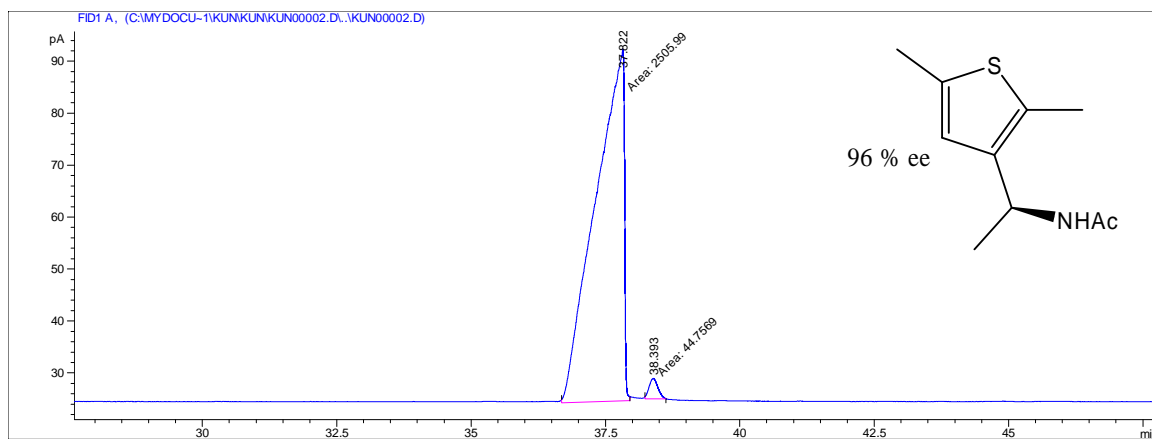

## N-(chroman-4-yl)acetamide (20c)

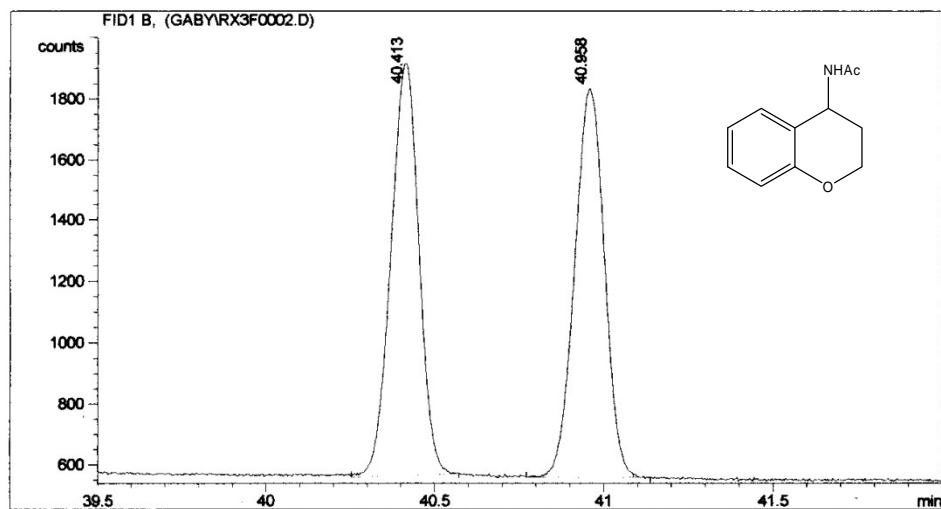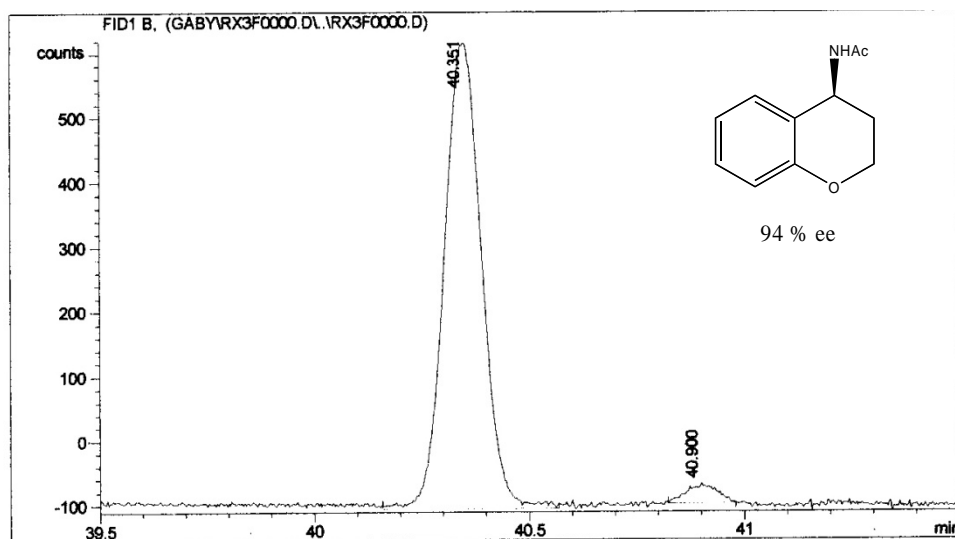

# *N*-(6-chlorochroman-4-yl)acetamide (20d)

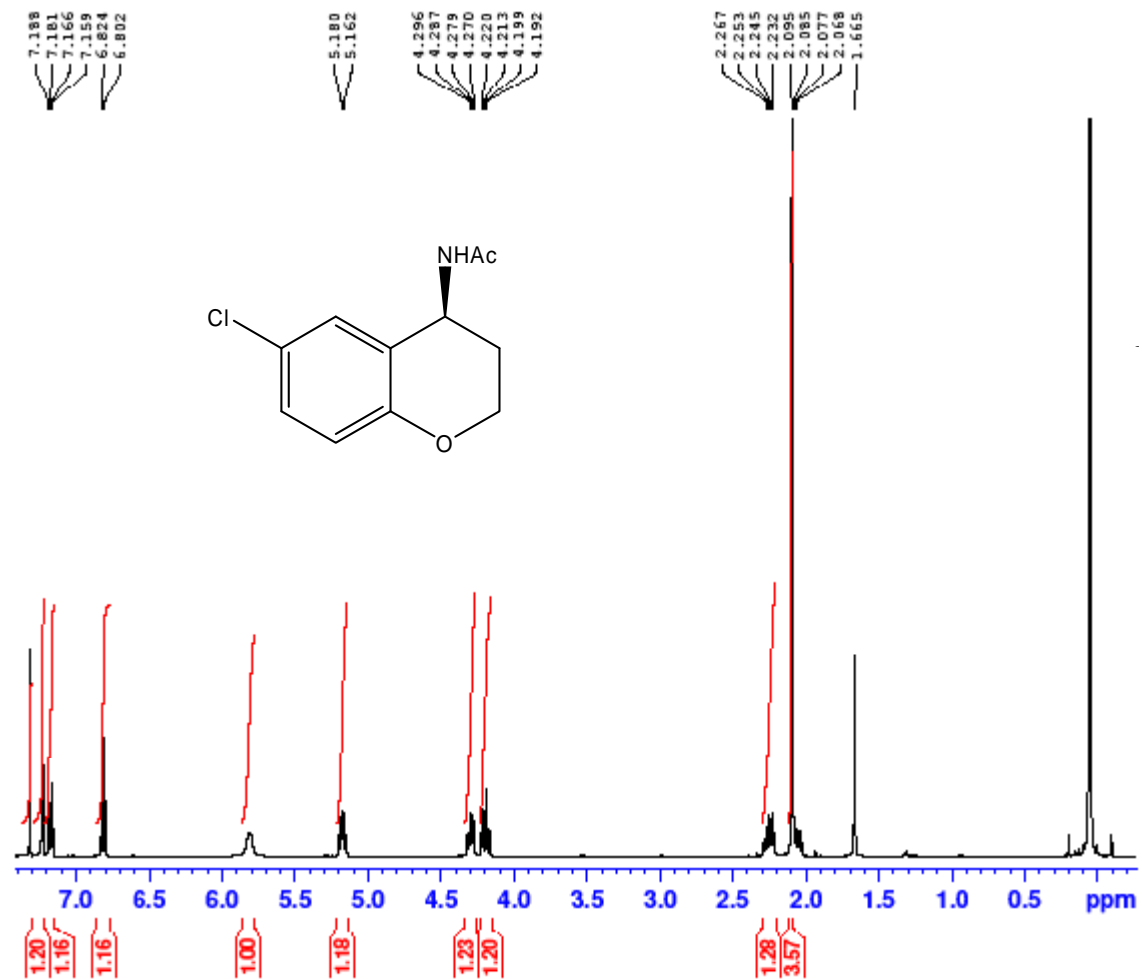

# *N*-(6-chlorochroman-4-yl)acetamide (20d)

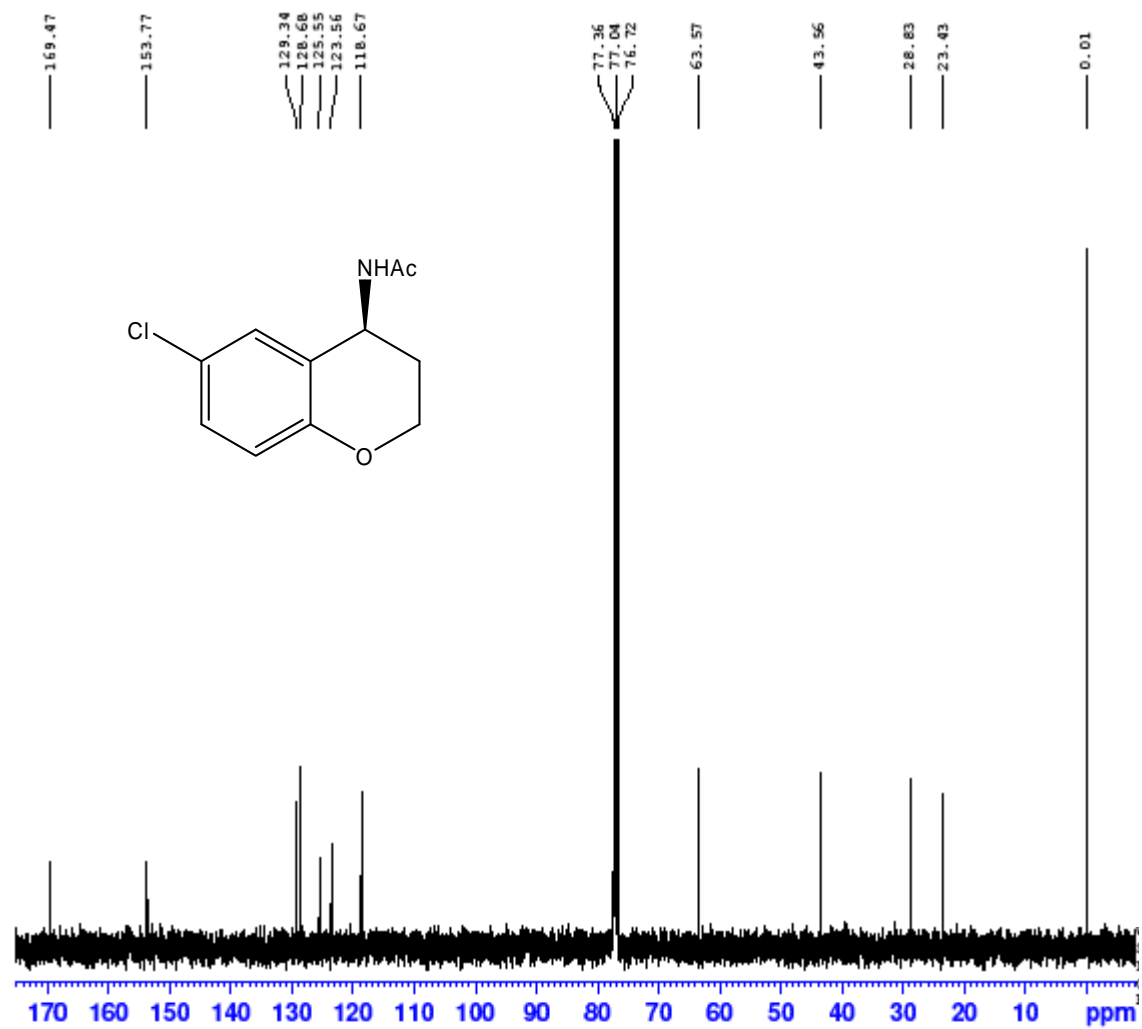

## ***N*-(6-chlorochroman-4-yl)acetamide (20d)**

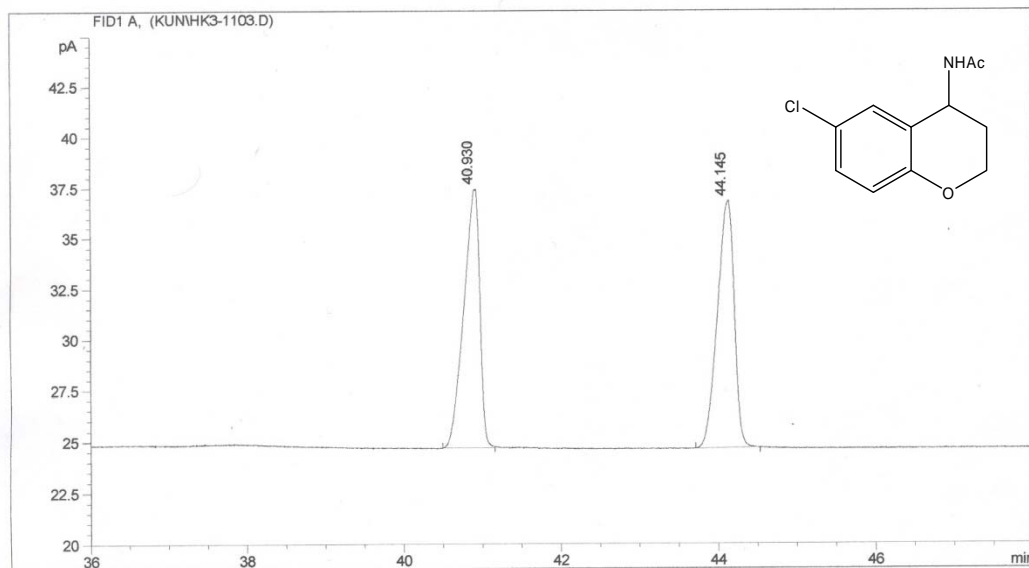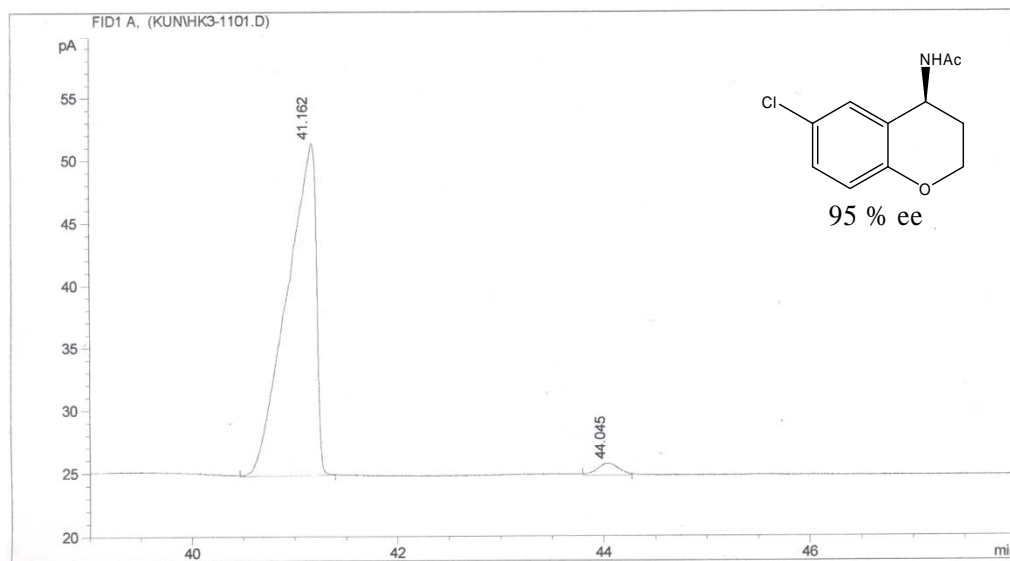



# N-(thiochroman-4-yl)acetamide (20e)

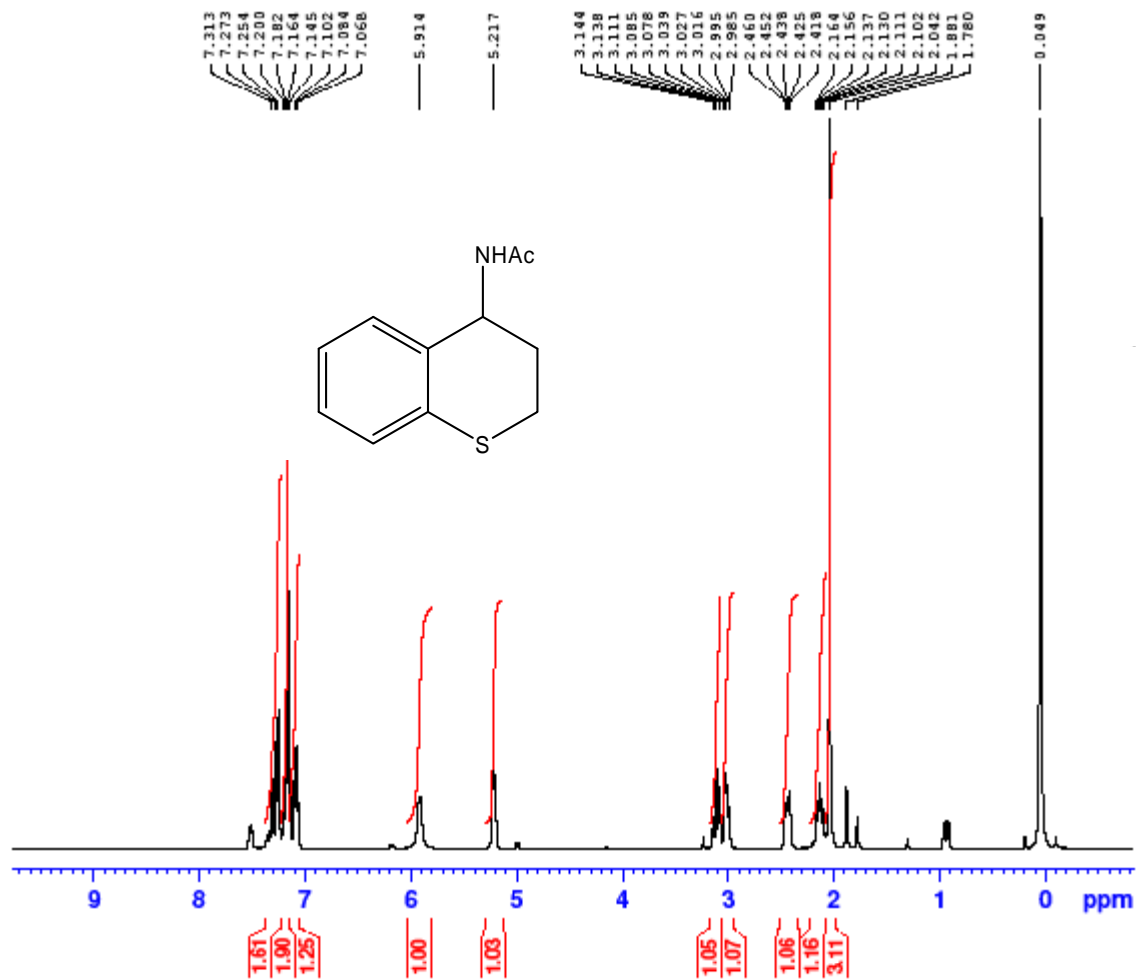

# *N*-(thiochroman-4-yl)acetamide (20e)

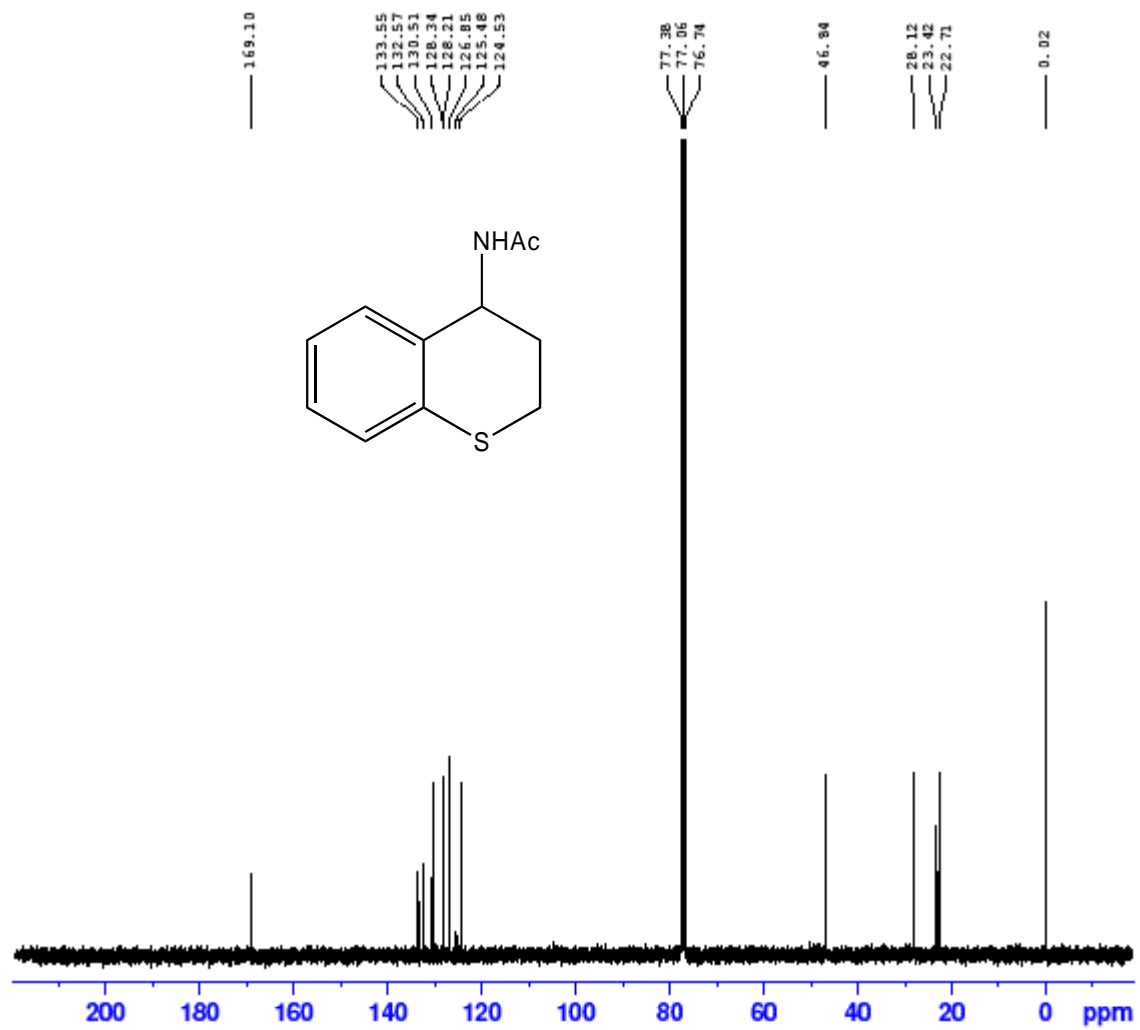

## *N*-(thiochroman-4-yl)acetamide (20e)

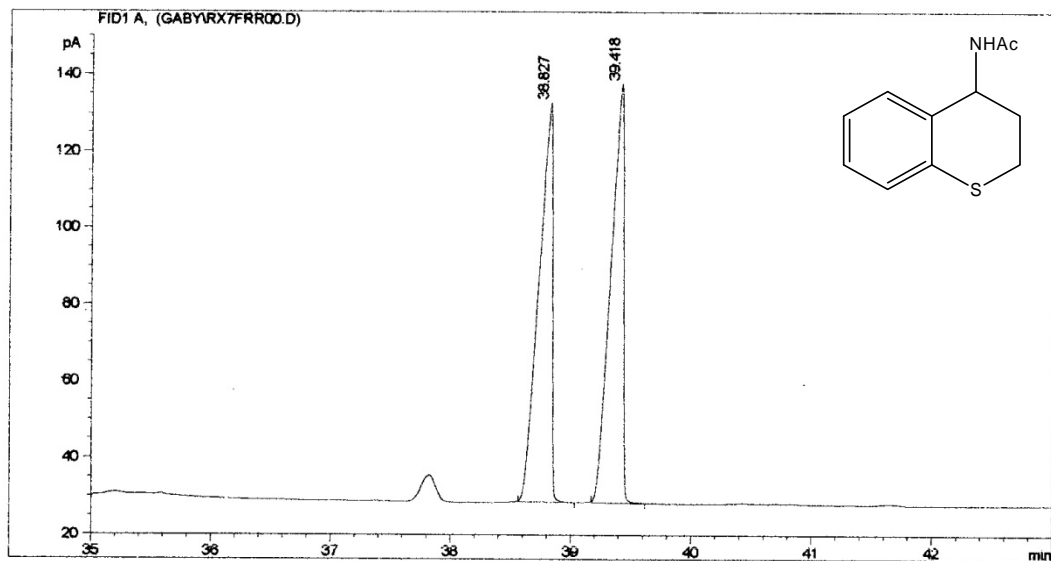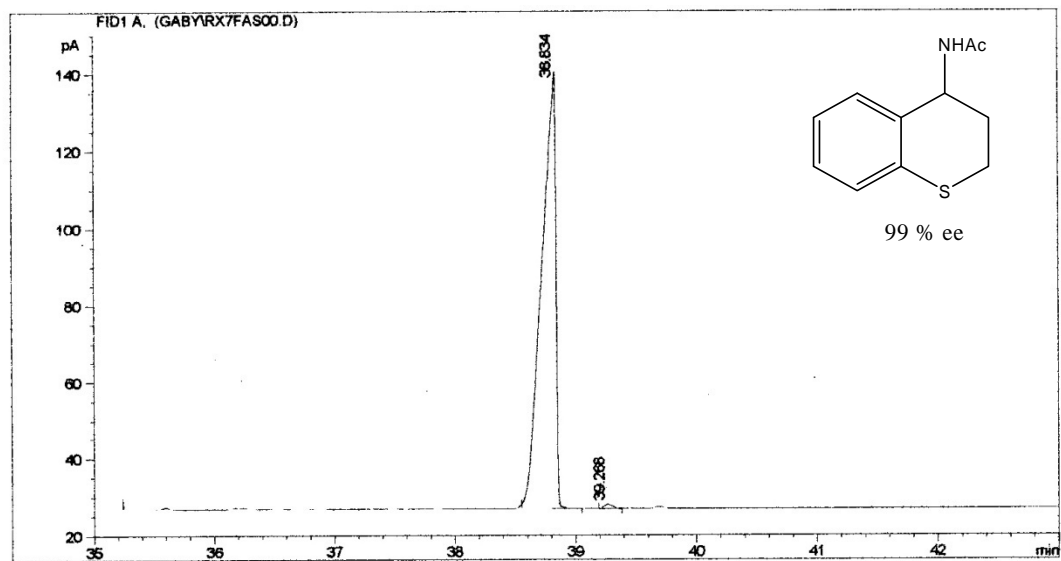

# *N*-(6-chlorothiochroman-4-yl)acetamide (20f)

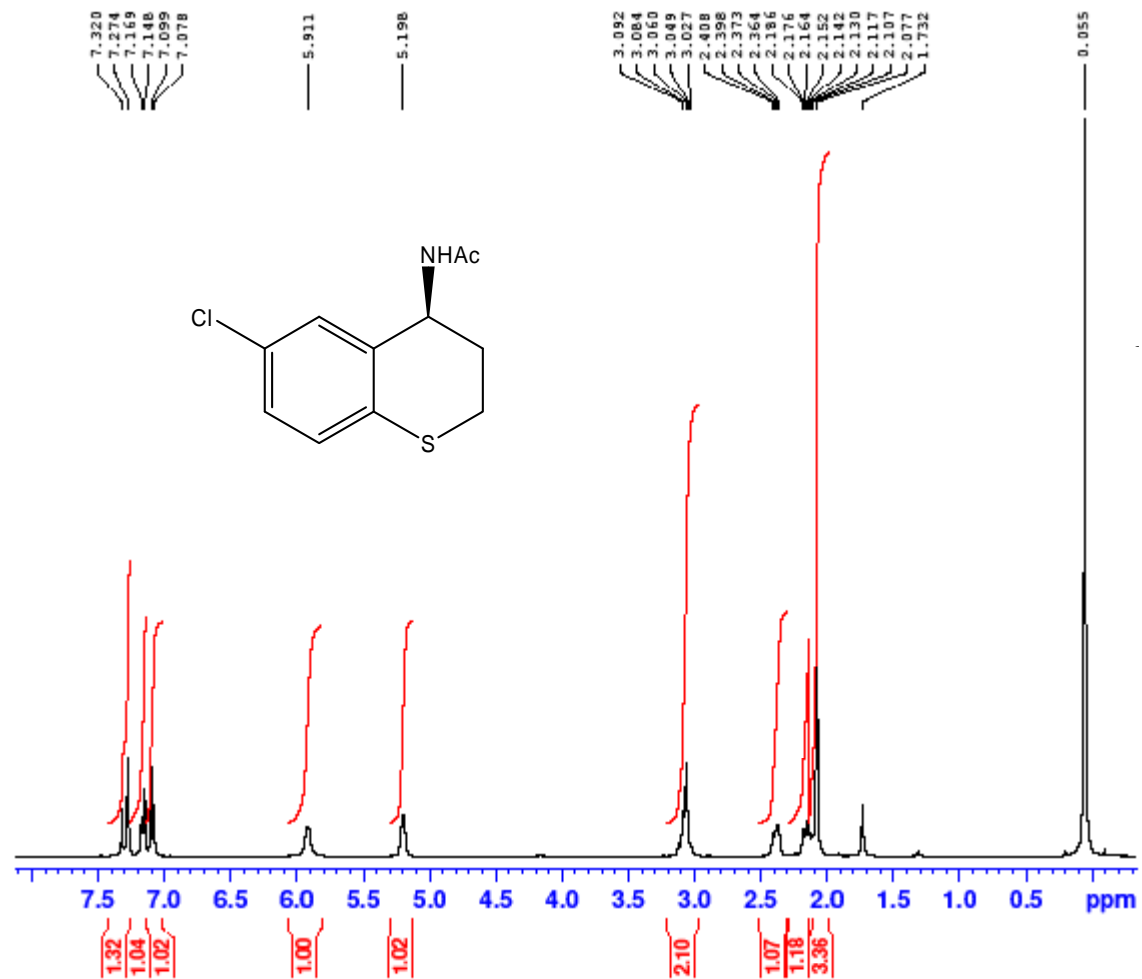

# *N*-(6-chlorothiochroman-4-yl)acetamide (20f)

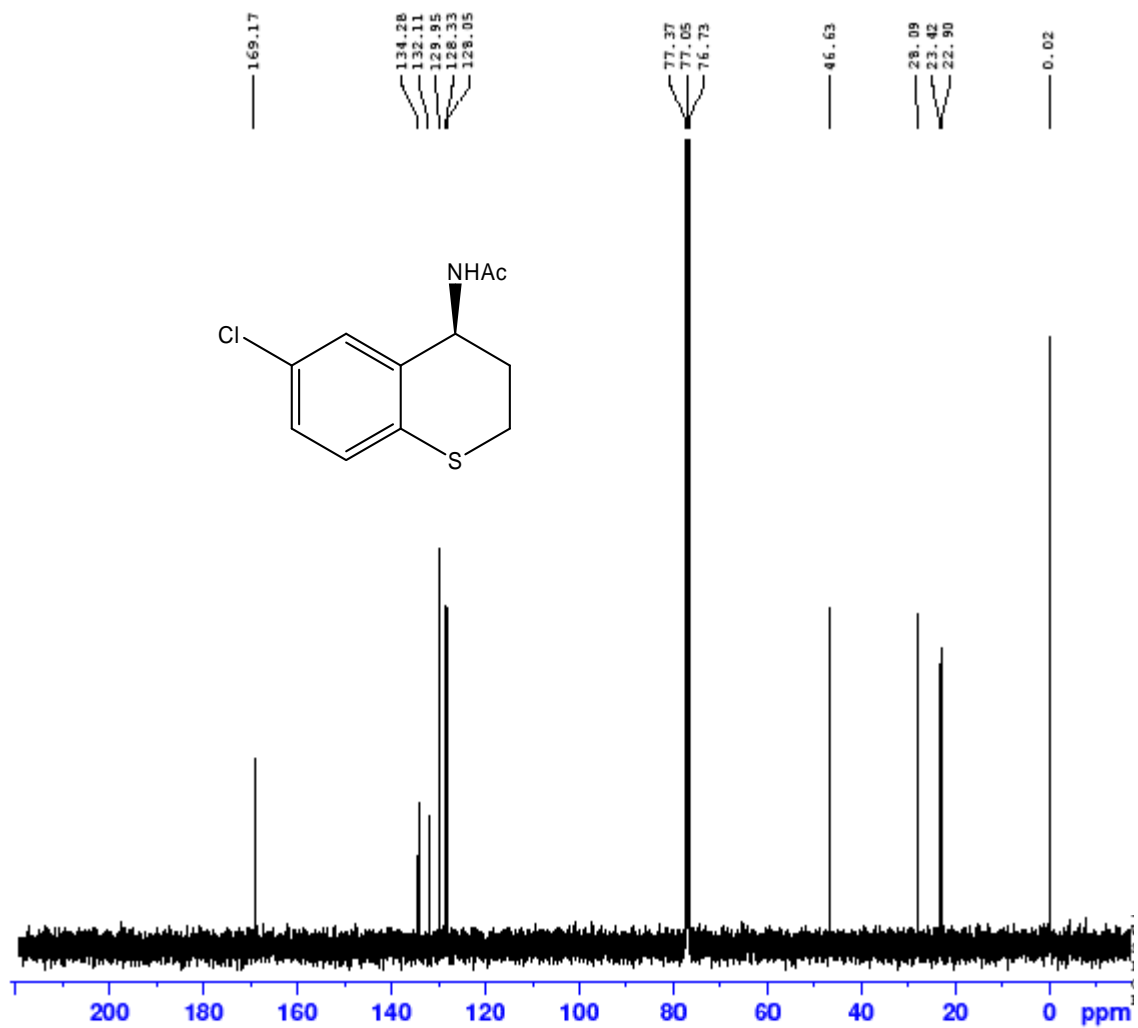

# *N*-(6-chlorothiochroman-4-yl)acetamide (20f)

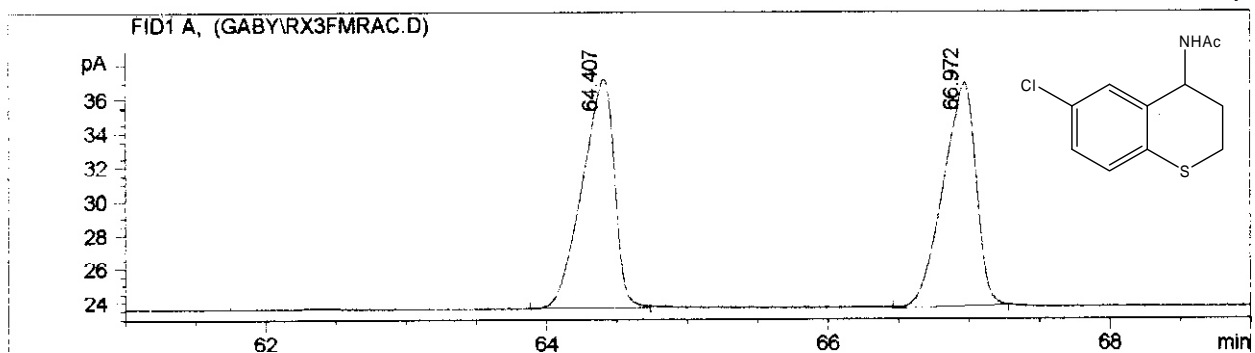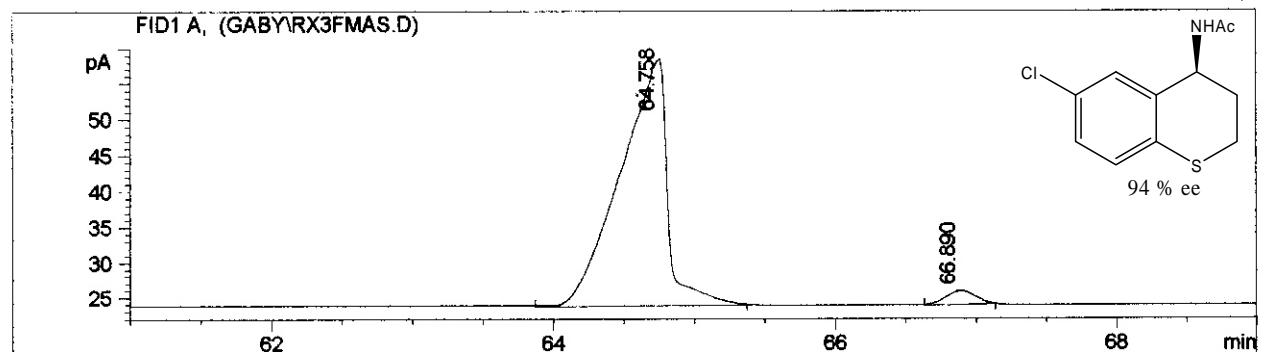

# ***N*--(1-(Pyridin-3-yl)ethyl)acetamide (22a)**

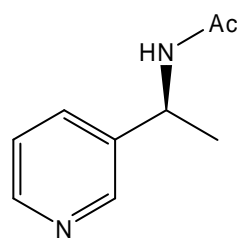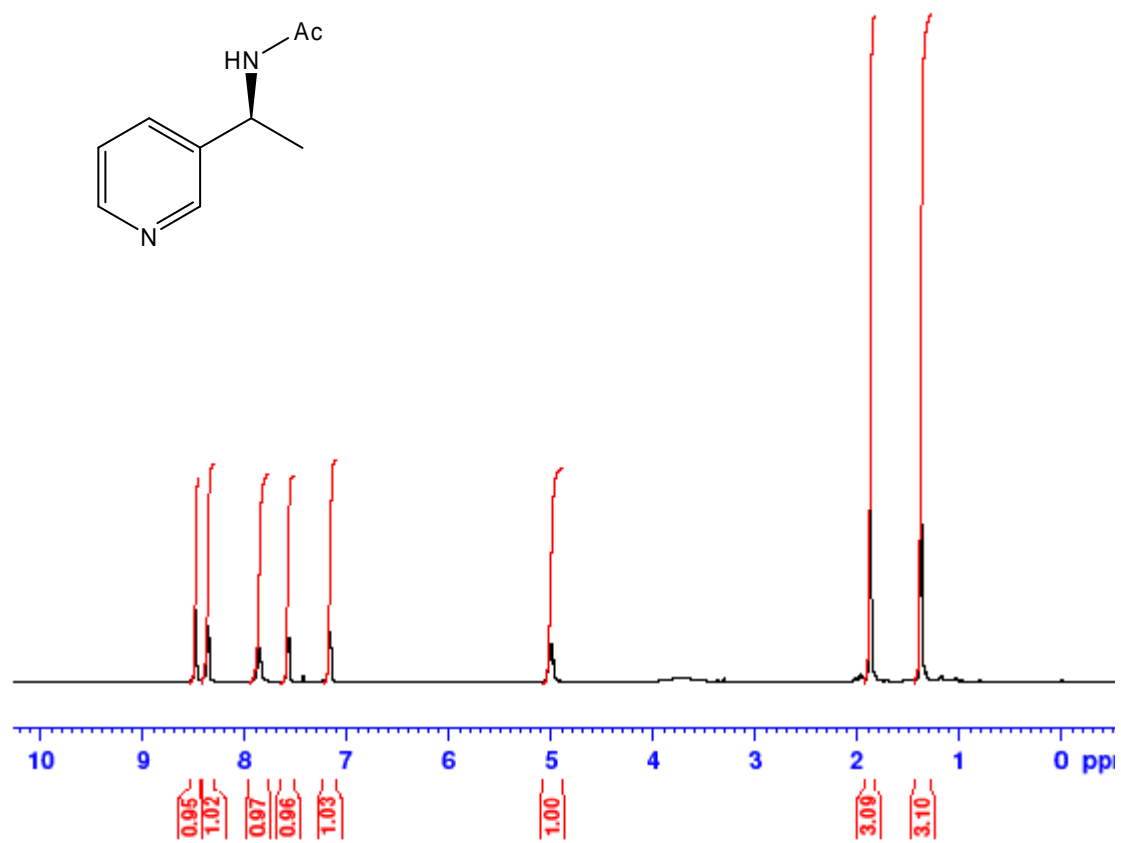

# ***N*-(1-(Pyridin-3-yl)-ethyl)acetamide (22a)**

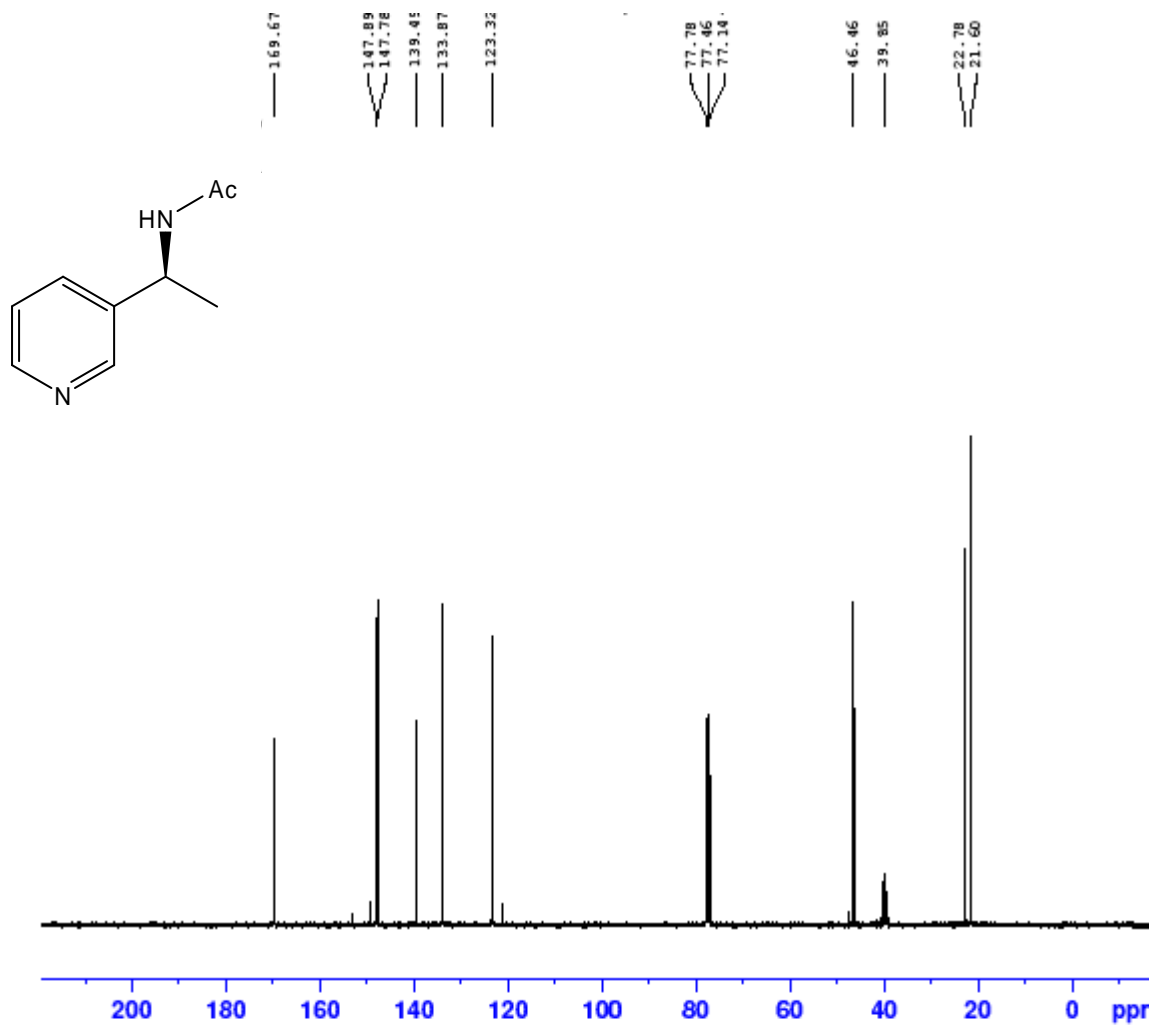



## N-(1-(Pyridin-3-yl)-ethyl)acetamide (22a)

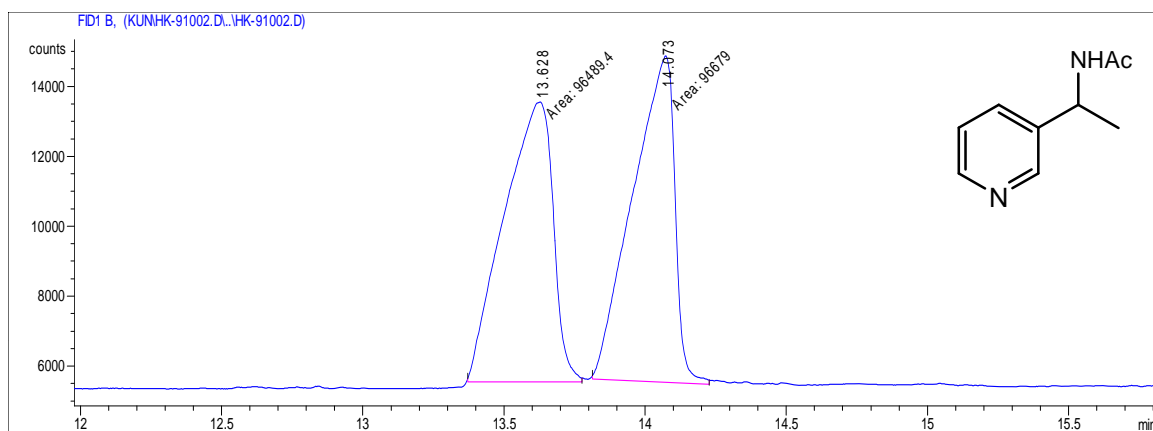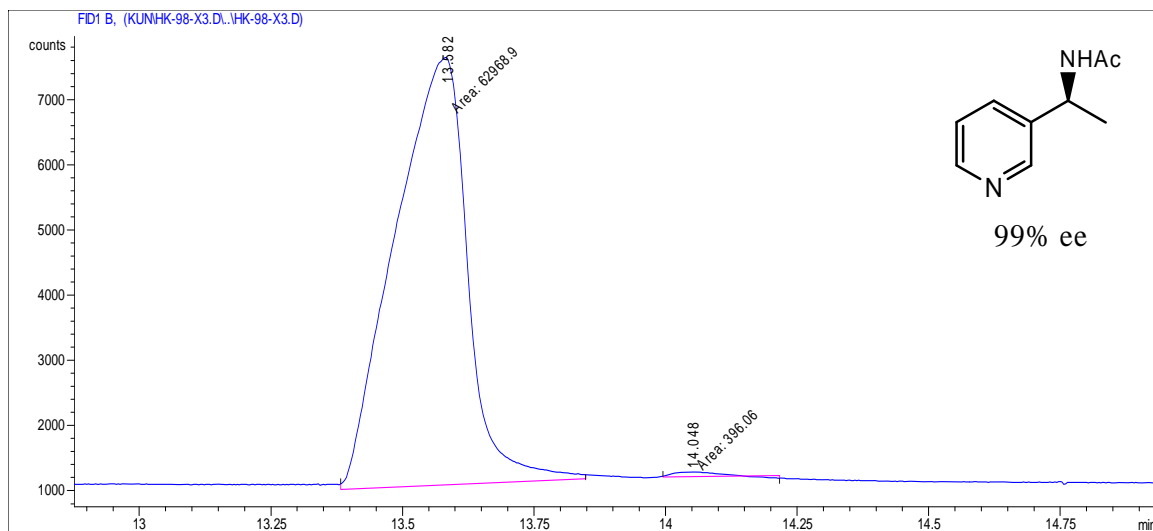

# ***N*-(1-(Pyridin-4-yl)-ethyl)acetamide (24a)**

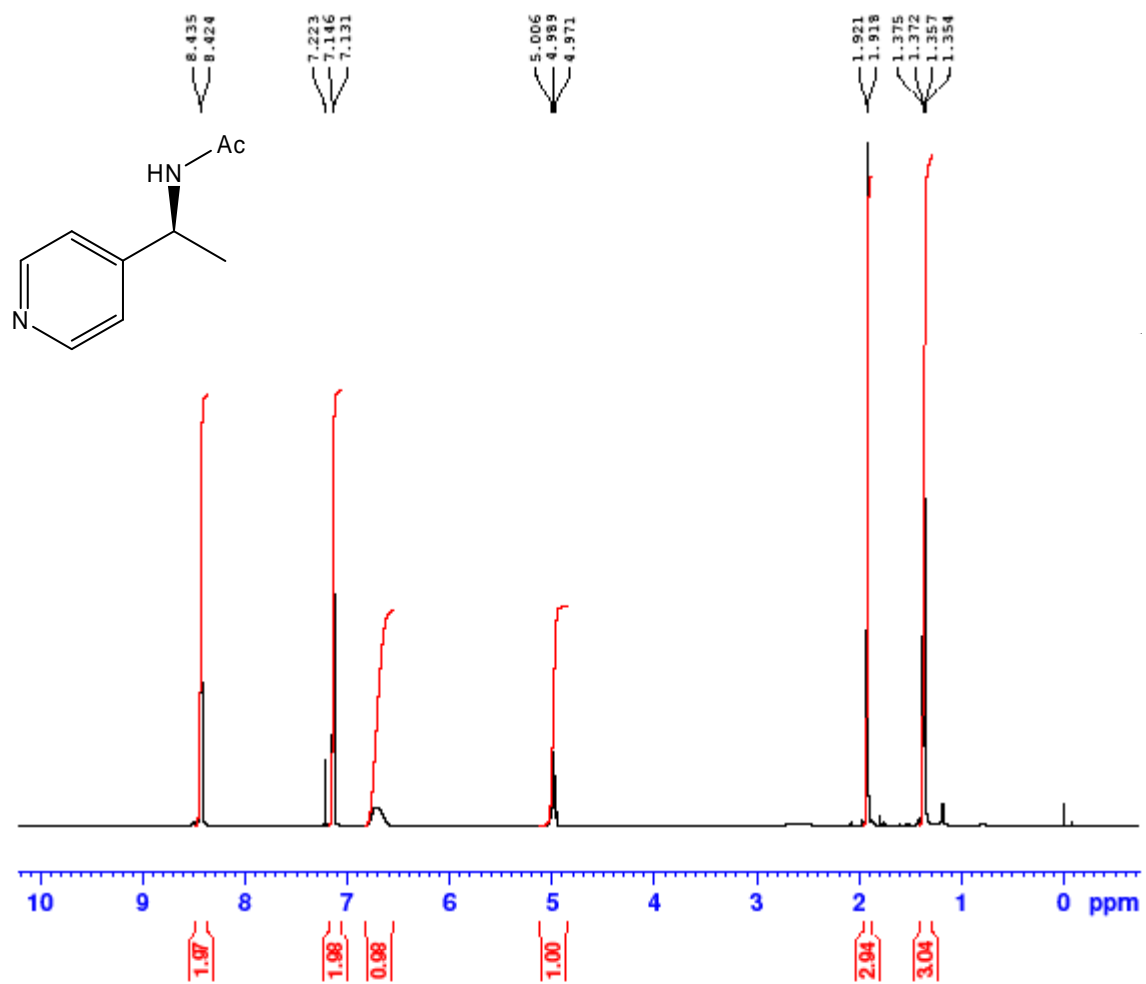

# N-(1-(Pyridin-4-yl)-ethyl)acetamide (24a)

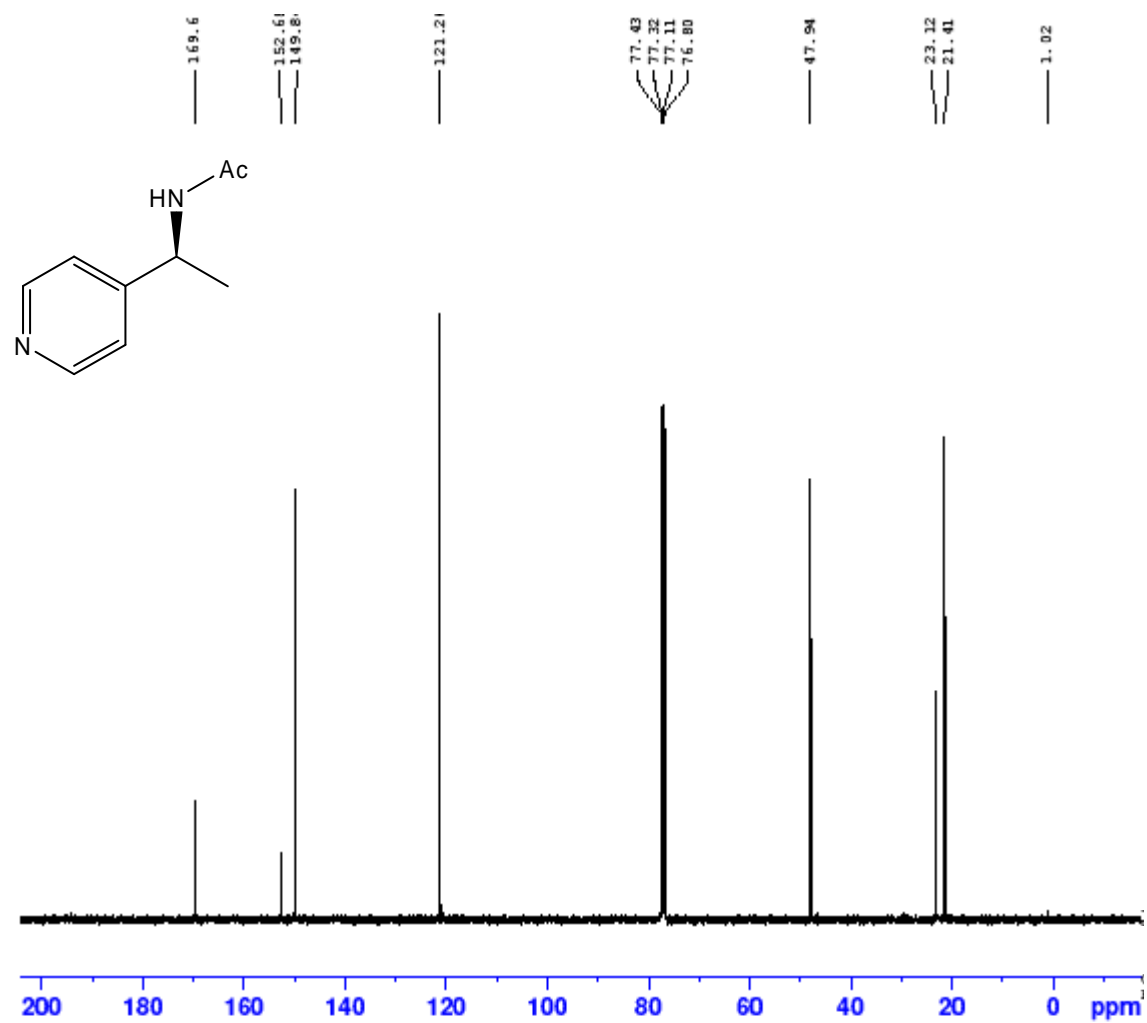

## N-(1-(Pyridin-4-yl)-ethyl)acetamide (24a)

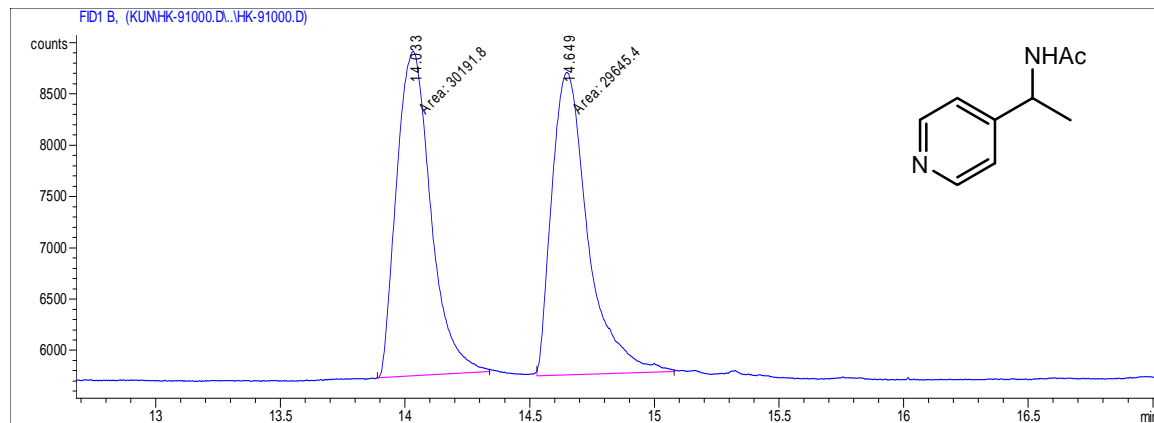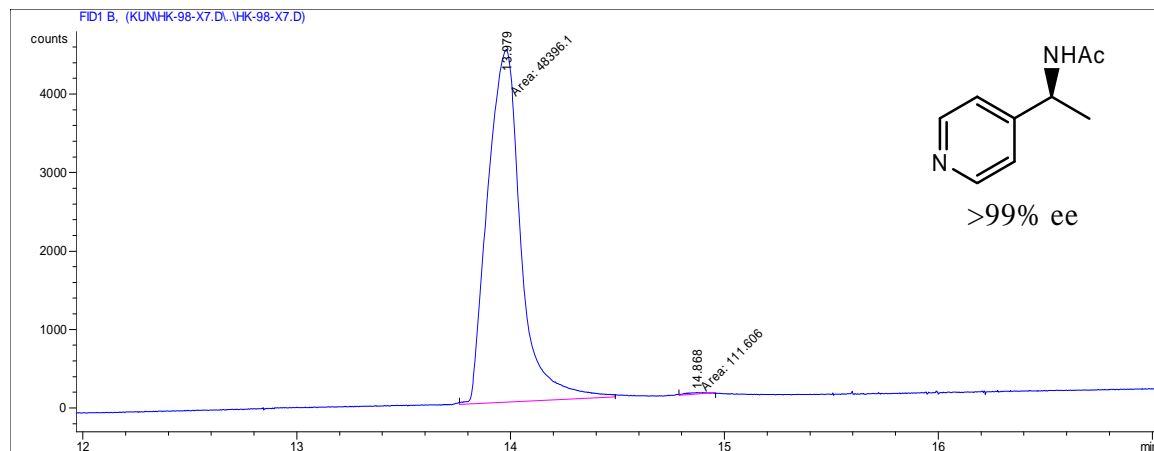



**(E)-1-(Pyridine-2-yl)ethanone O-benzyl oxime (25)**

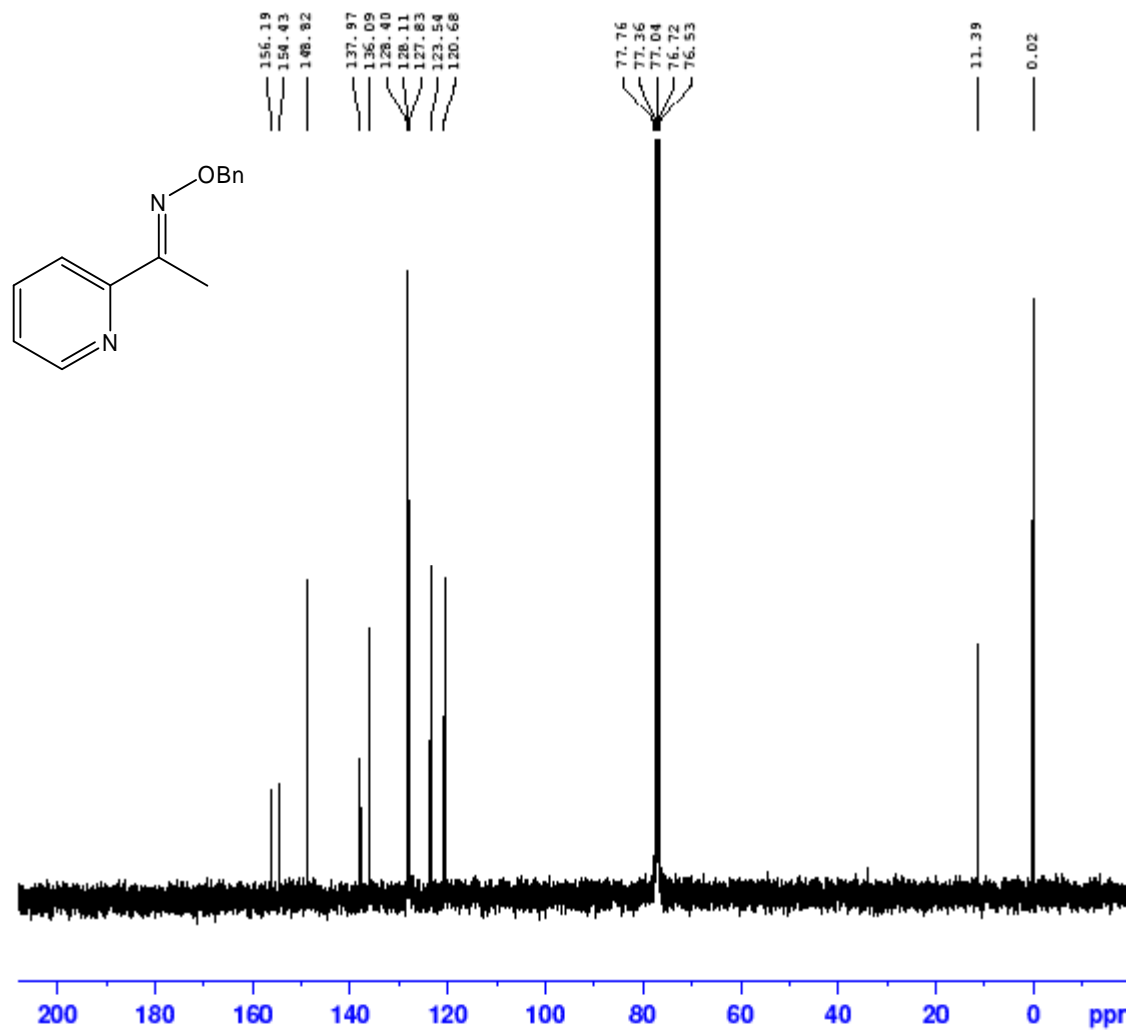

# N-(1-(Pyridin-2-yl)-ethyl)acetamide (27)

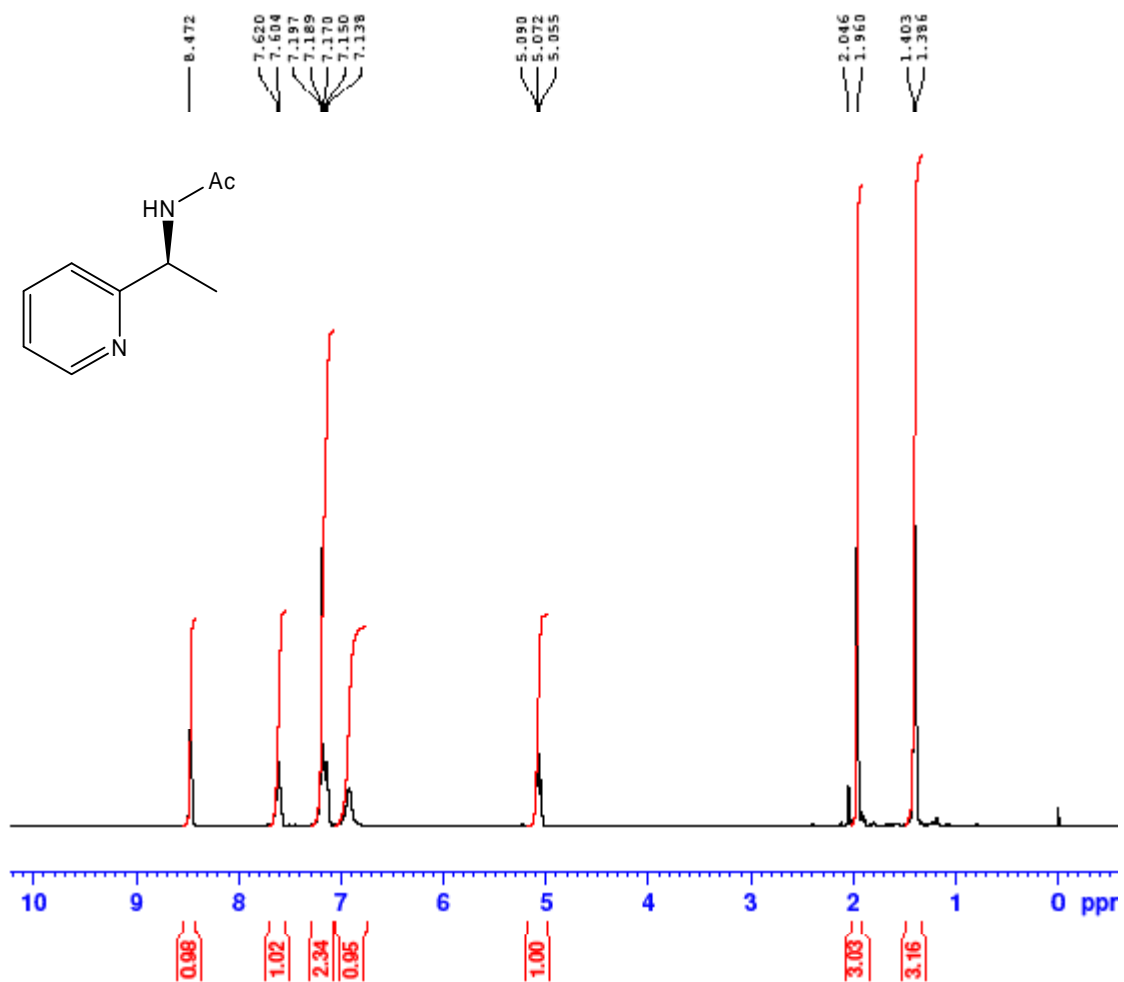

# *N*-(1-(Pyridin-2-yl)-ethyl)acetamide (27)

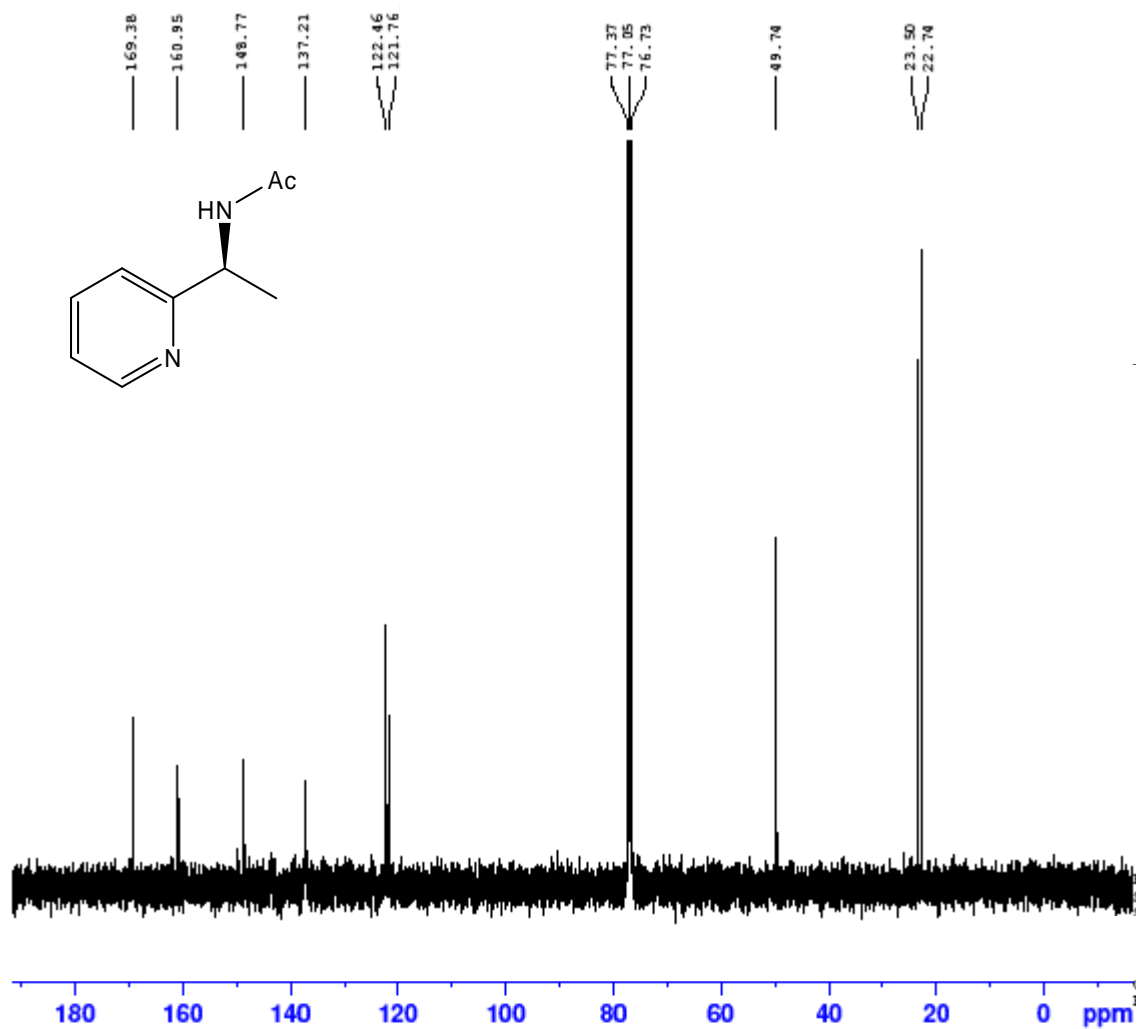



# N-(1-(Pyridin-2-yl)-ethyl)acetamide (27)

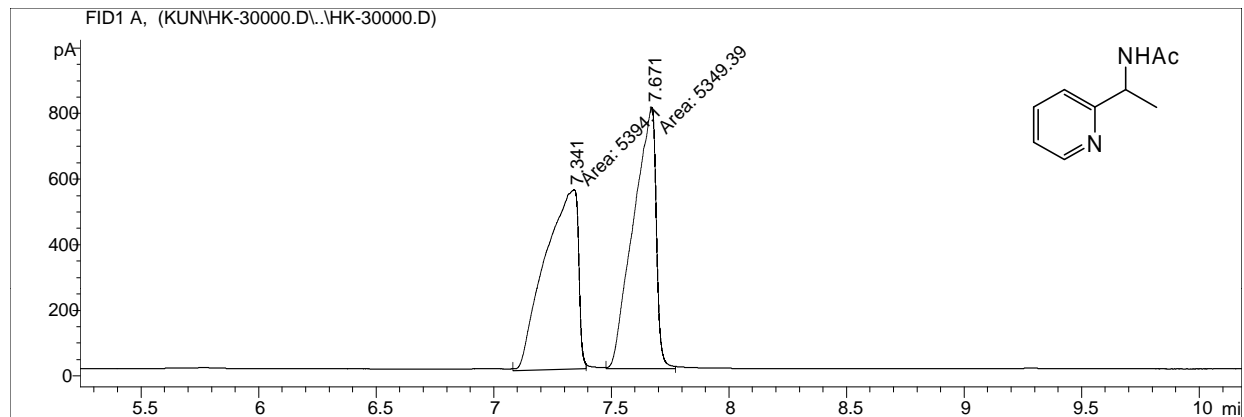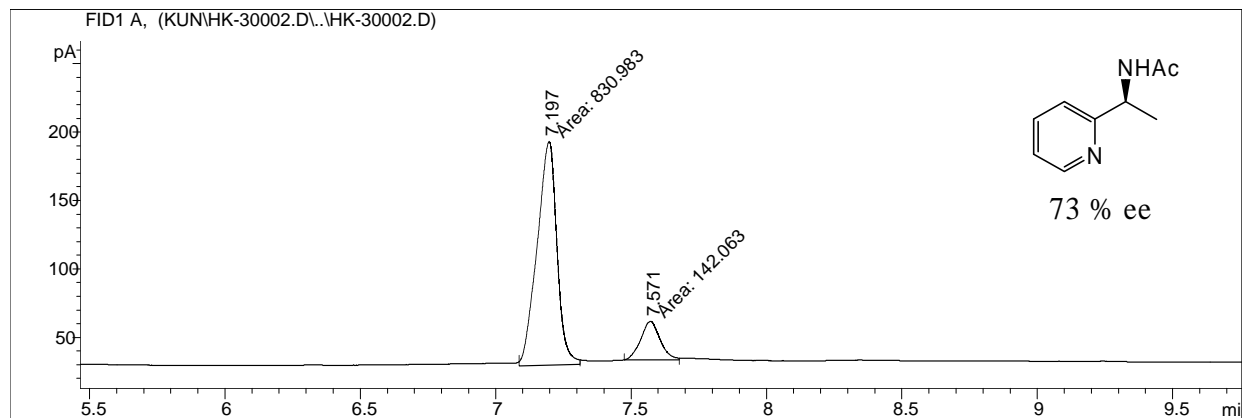

# N-(1-(Pyridine-3-yl)-propyl)acetamide (28)

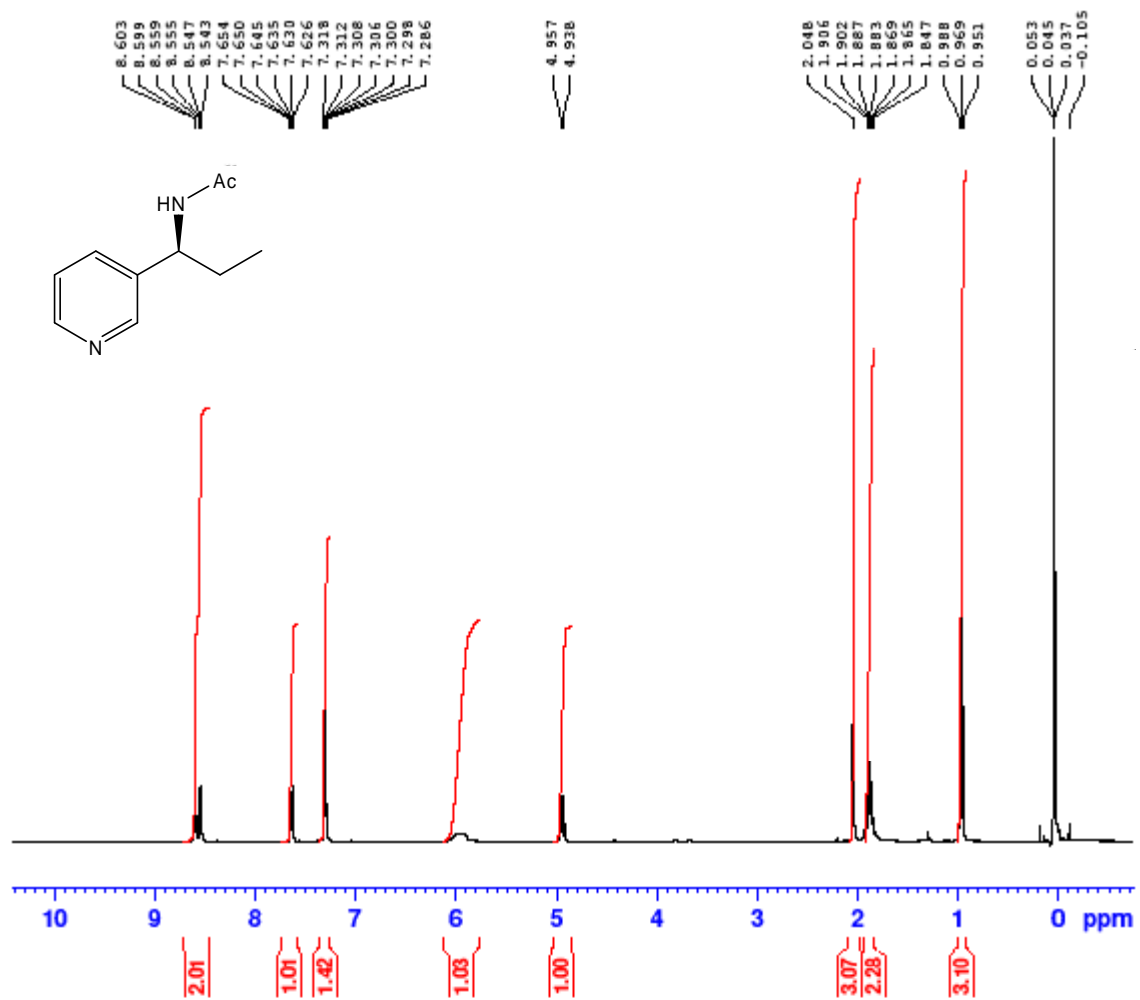

# ***N*-(1-(Pyridine-3-yl)-propyl)acetamide (28)**

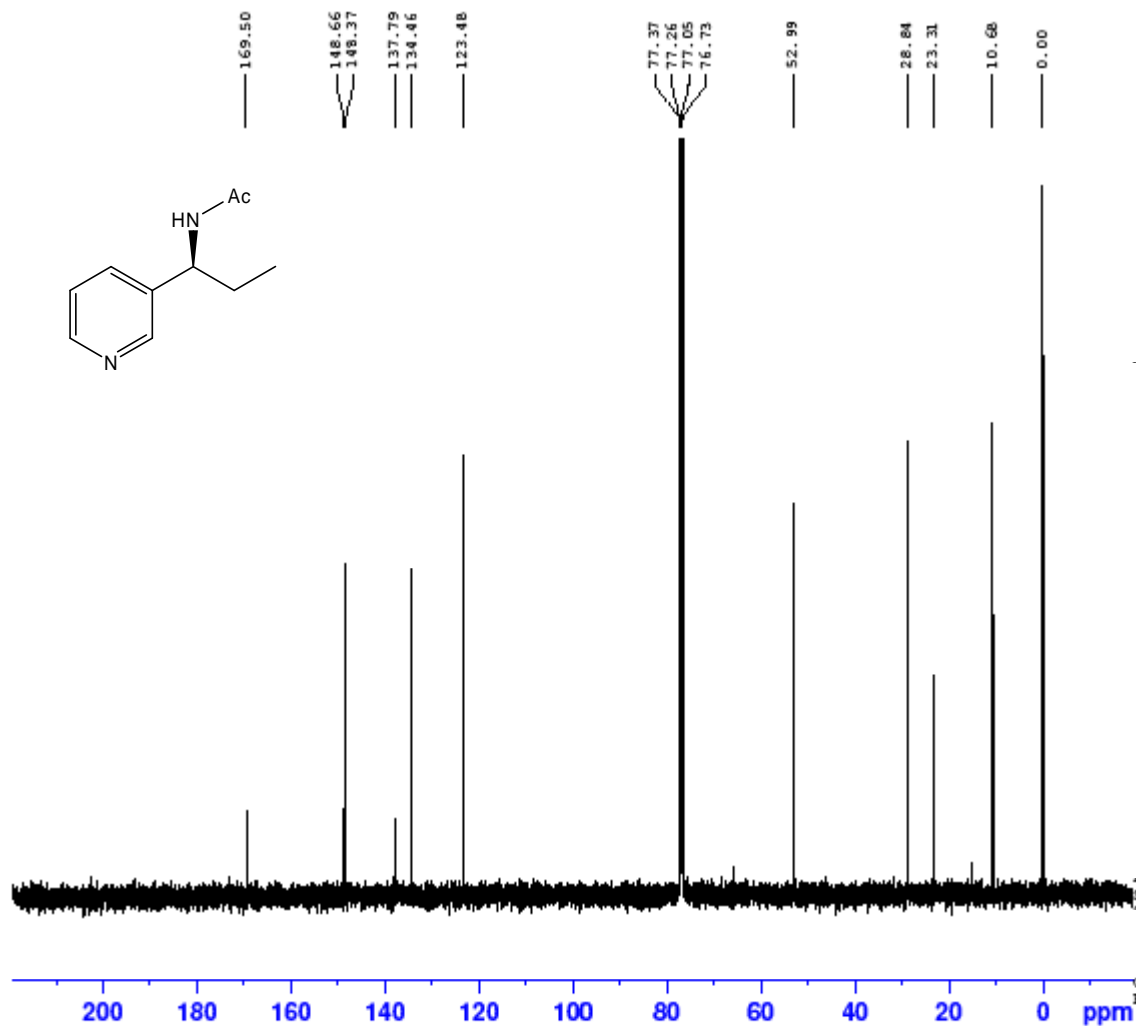

## N-(1-(Pyridine-3-yl)-propyl)acetamide (28)

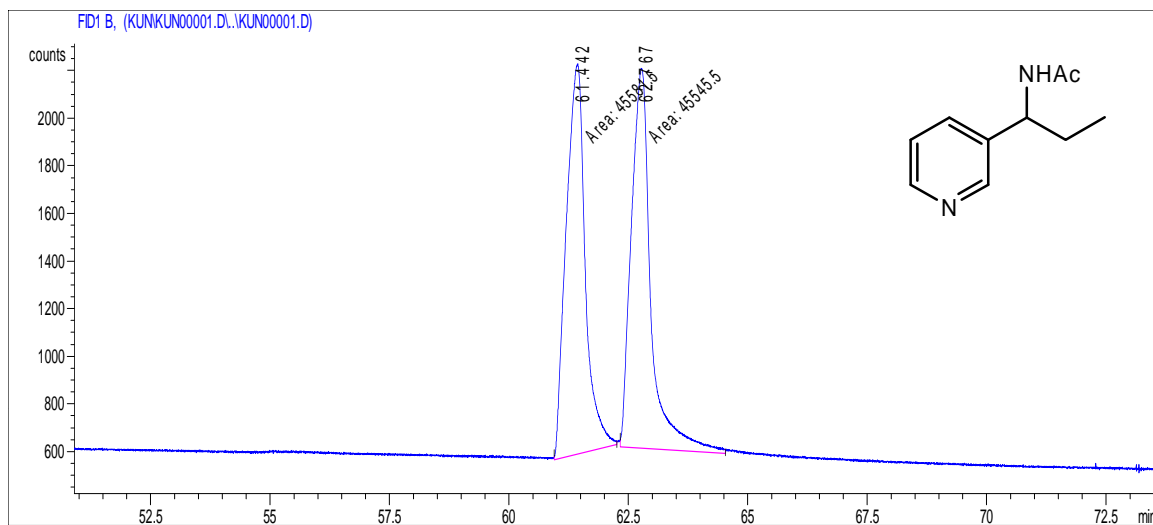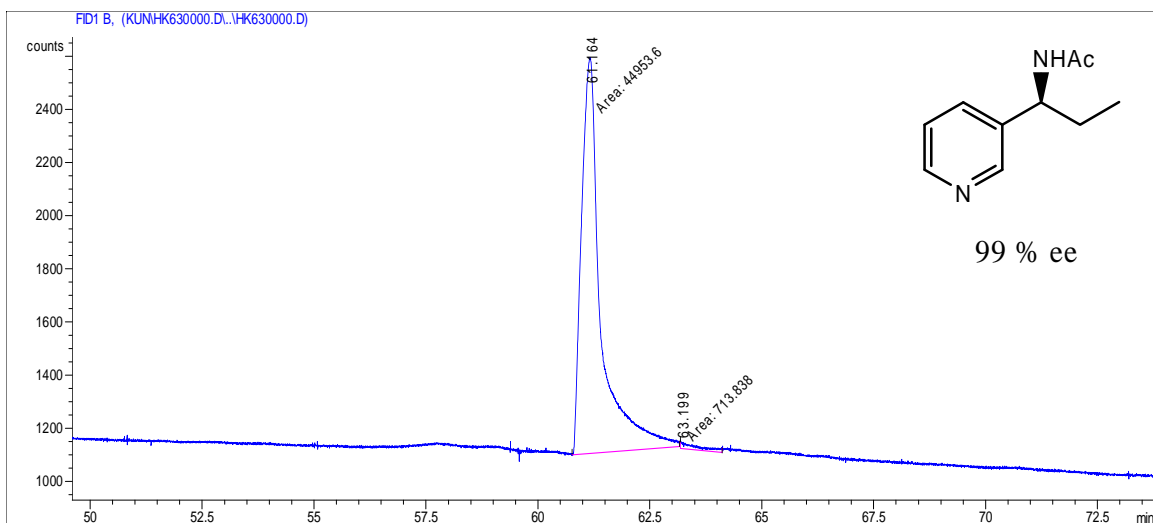

**(S)-N-(1-(6-methoxypyridine-3-yl)ethyl)acetamide (29)**

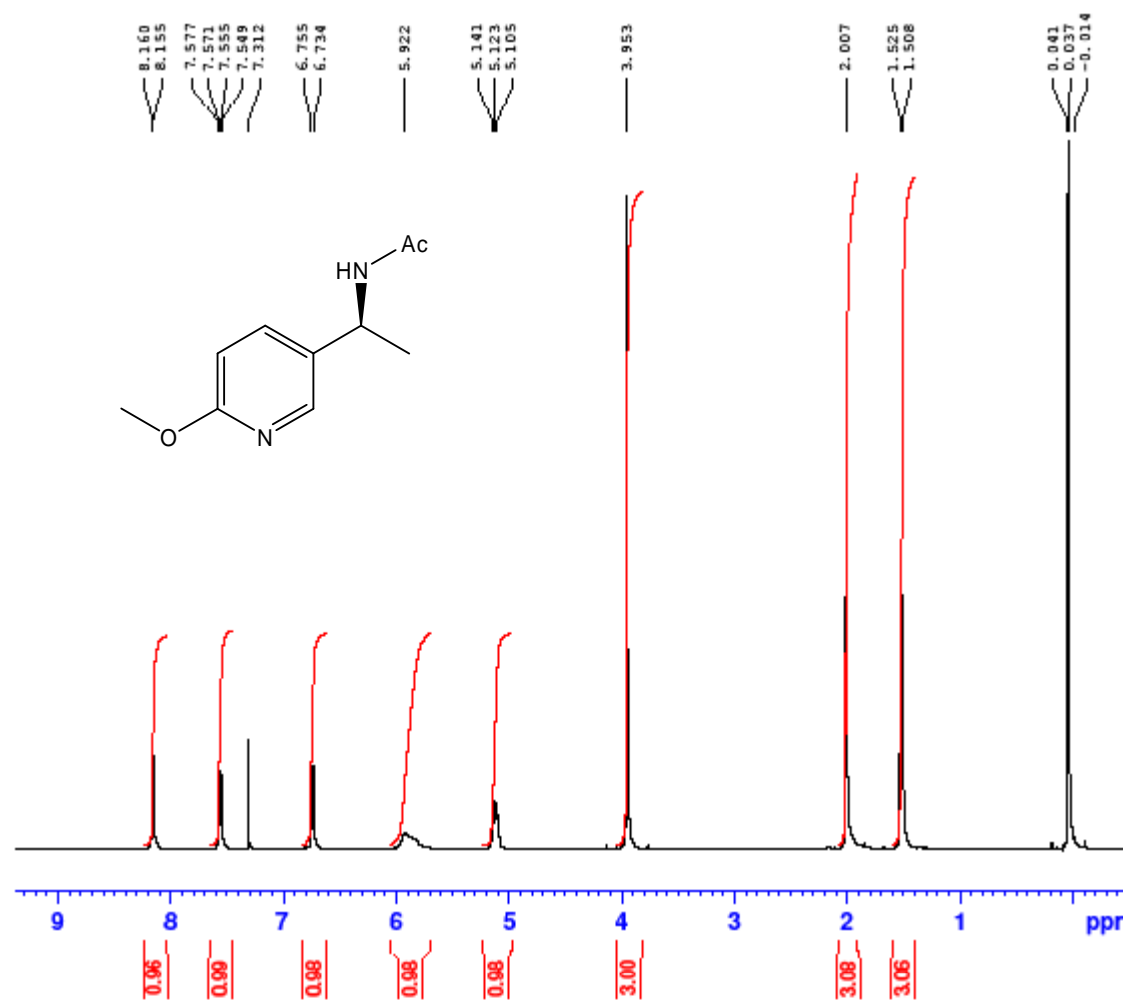

**(S)-N-(1-(6-methoxypyridine-3-yl)ethyl)acetamide (29)**

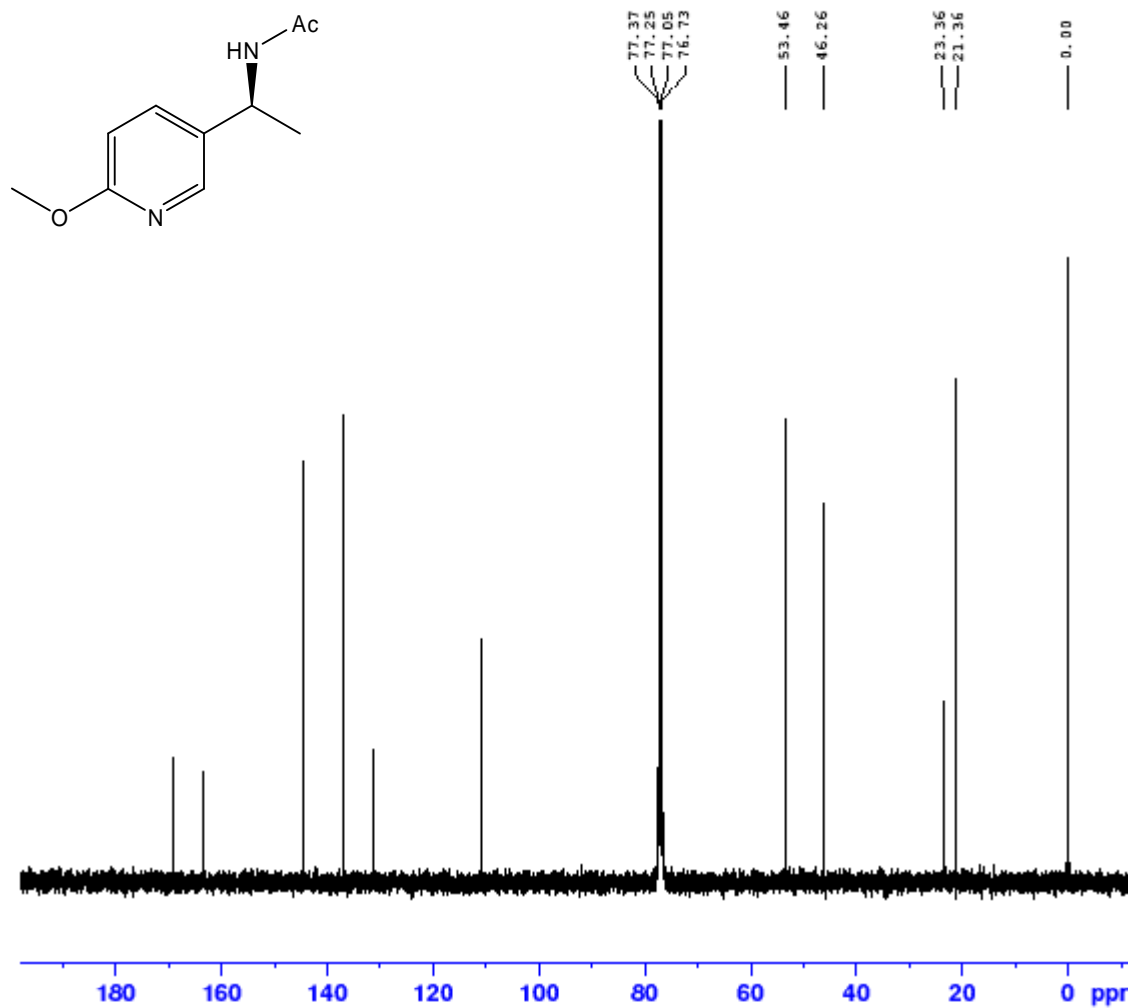

# (S)-N-(1-(6-methoxypyridine-3-yl)ethyl)acetamide (29)

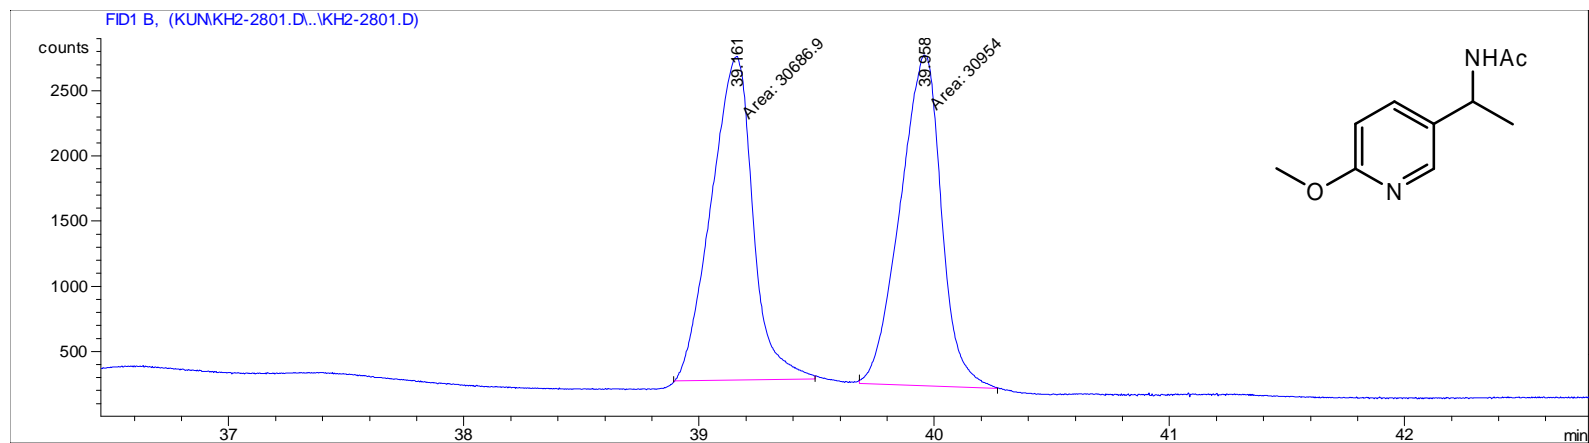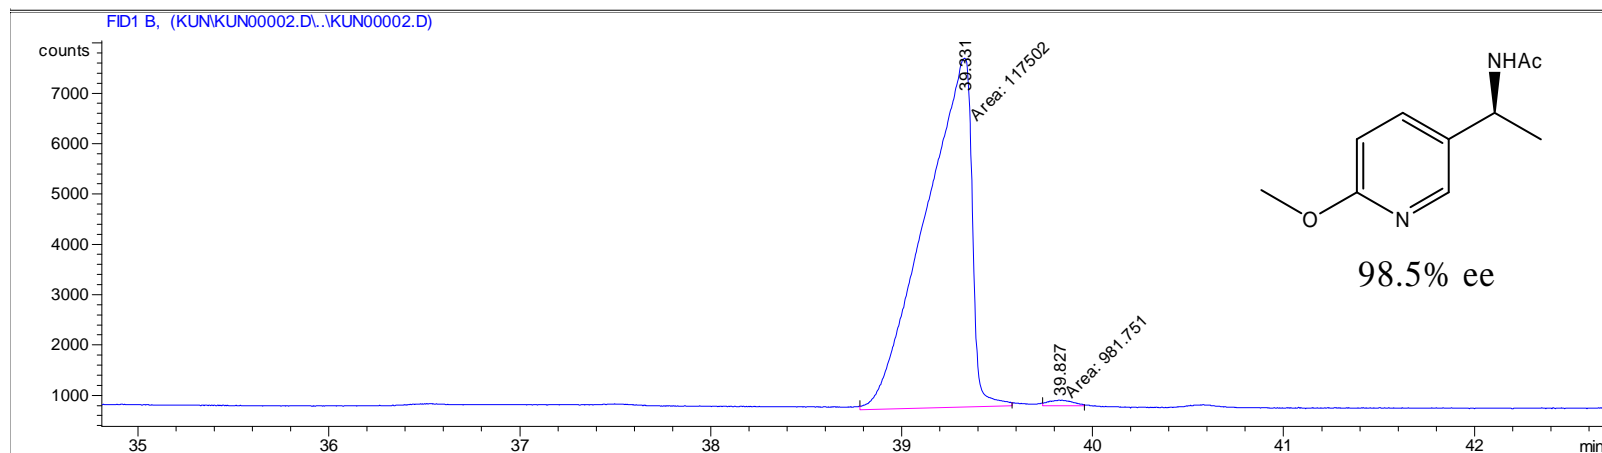

# N-Cyclopropyl-(pyridine-3-yl)-methyl-acetamide (30)

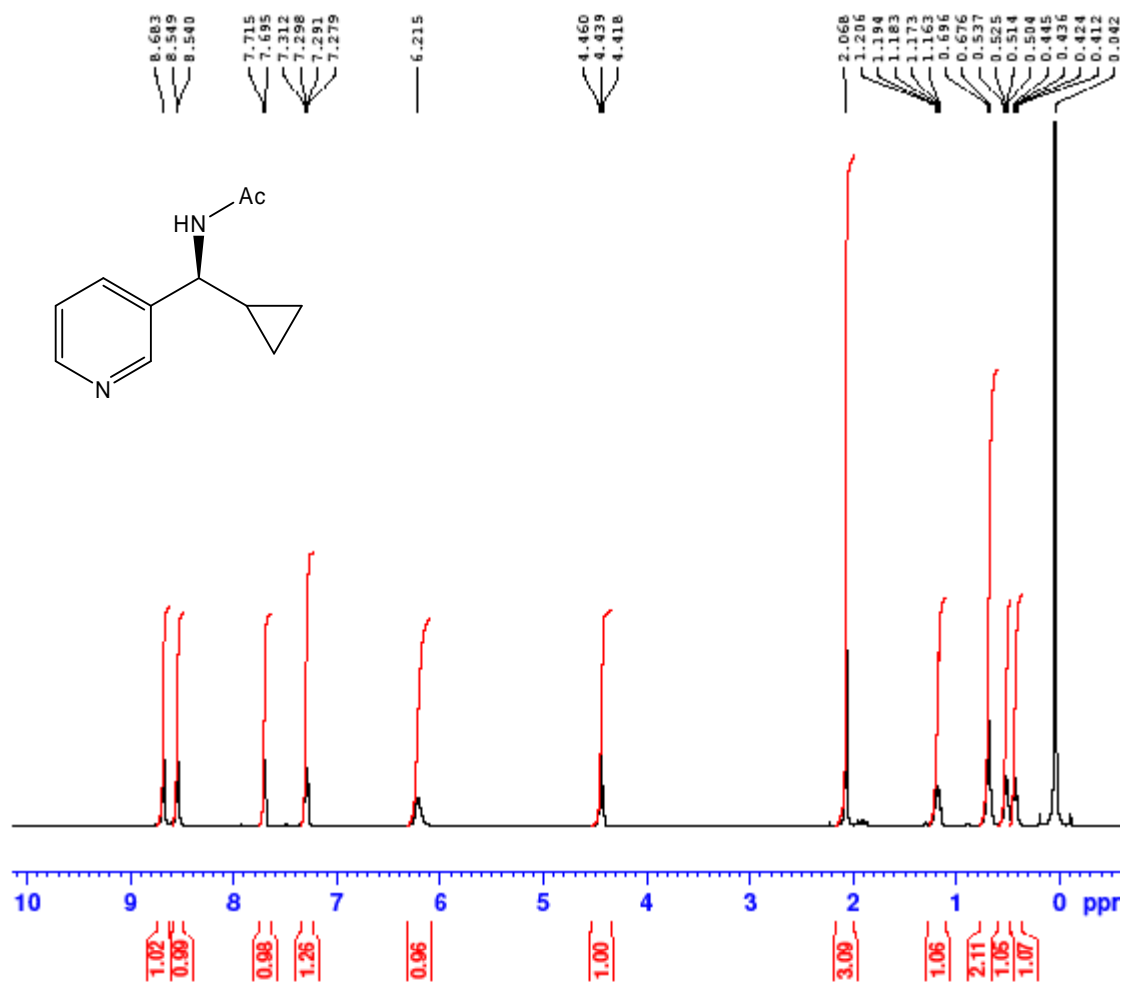



# N-Cyclopropyl-(pyridine-3-yl)-methyl)-acetamide (30)

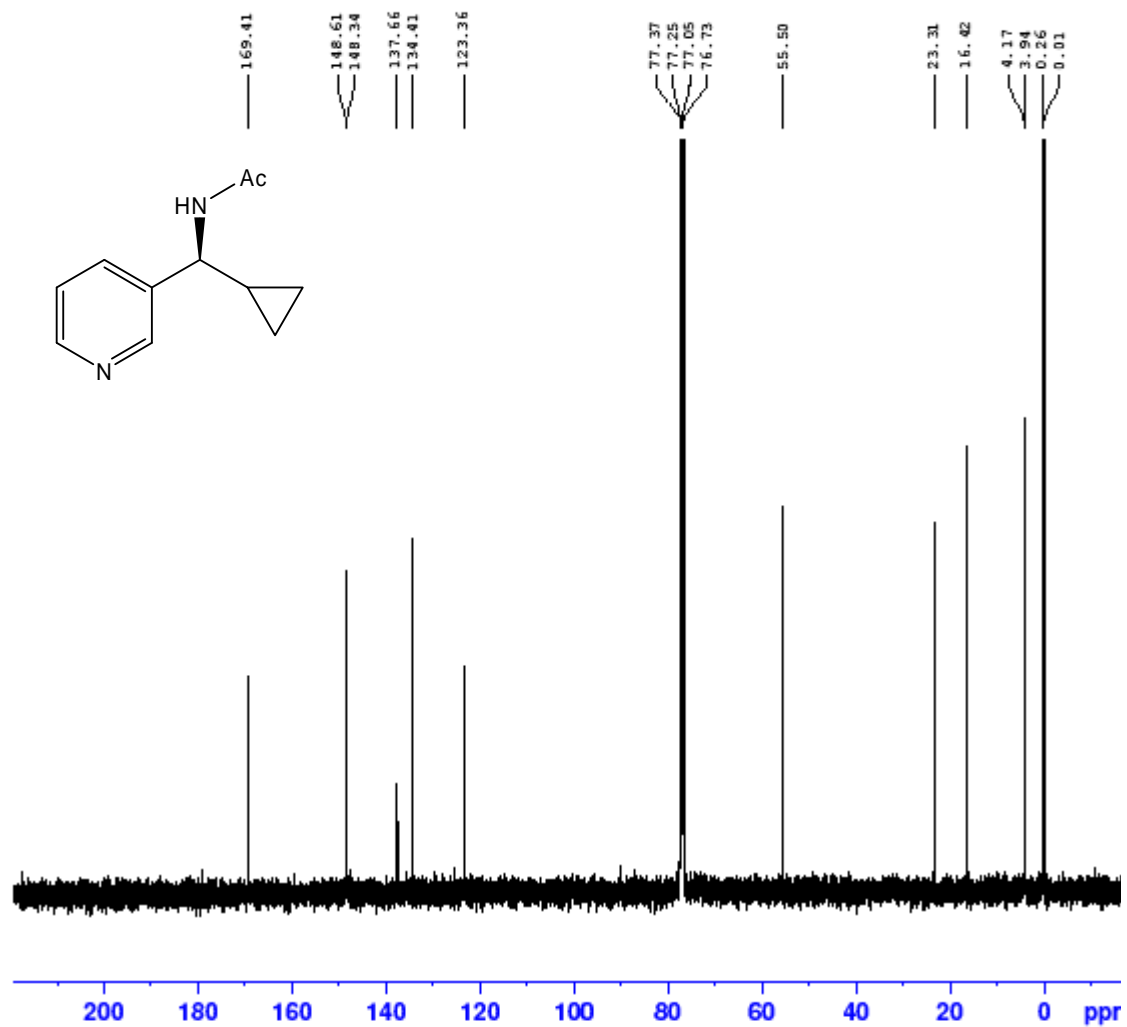

## N-Cyclopropyl-(pyridine-3-yl)-methyl-acetamide (30)

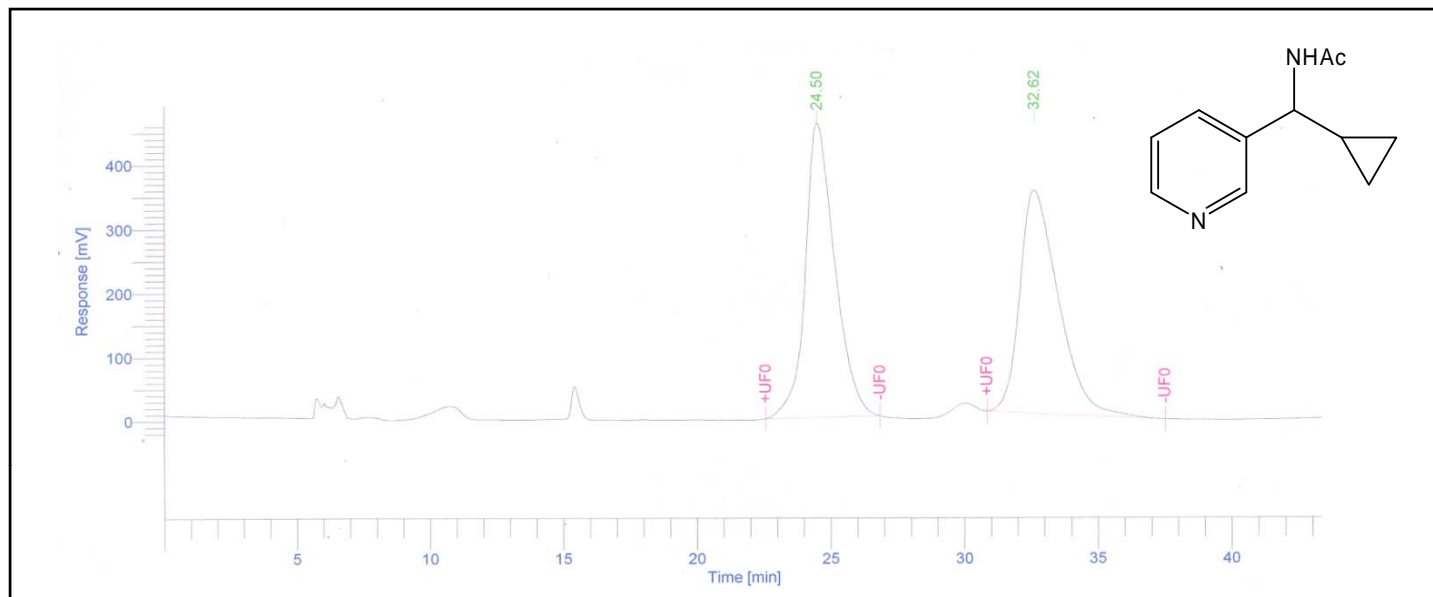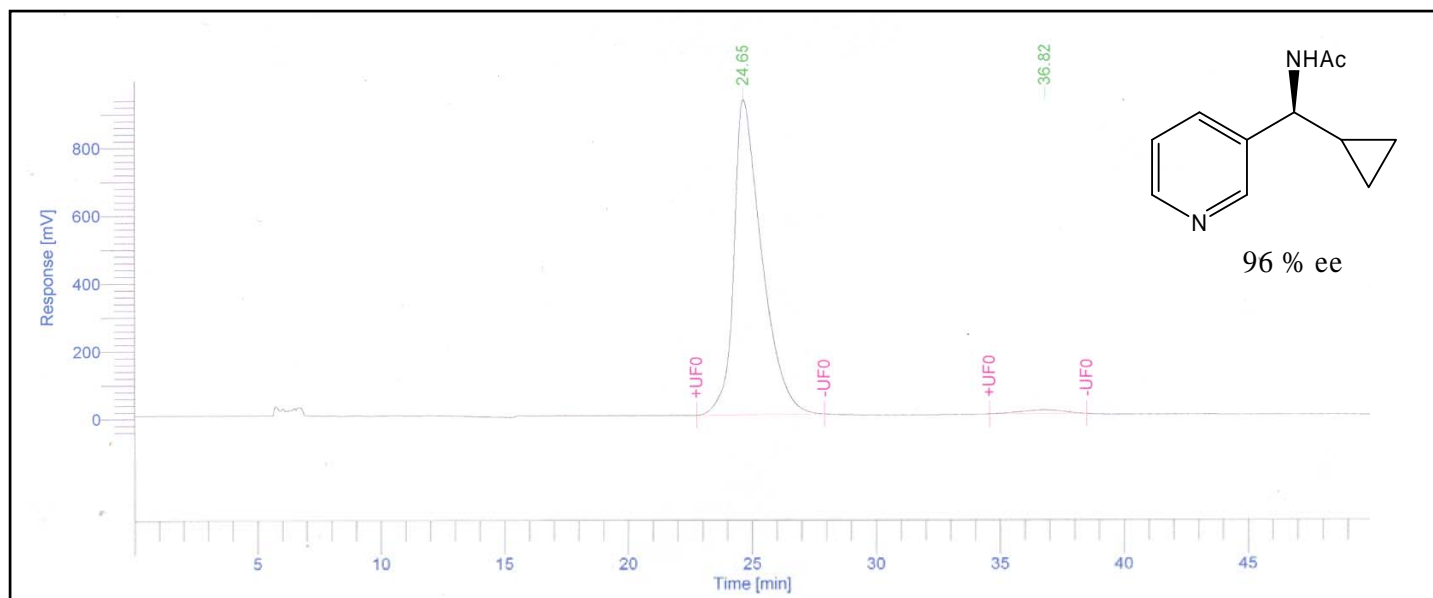

# (S)-N-(phenyl(pyridin-3-yl)methyl)acetamide

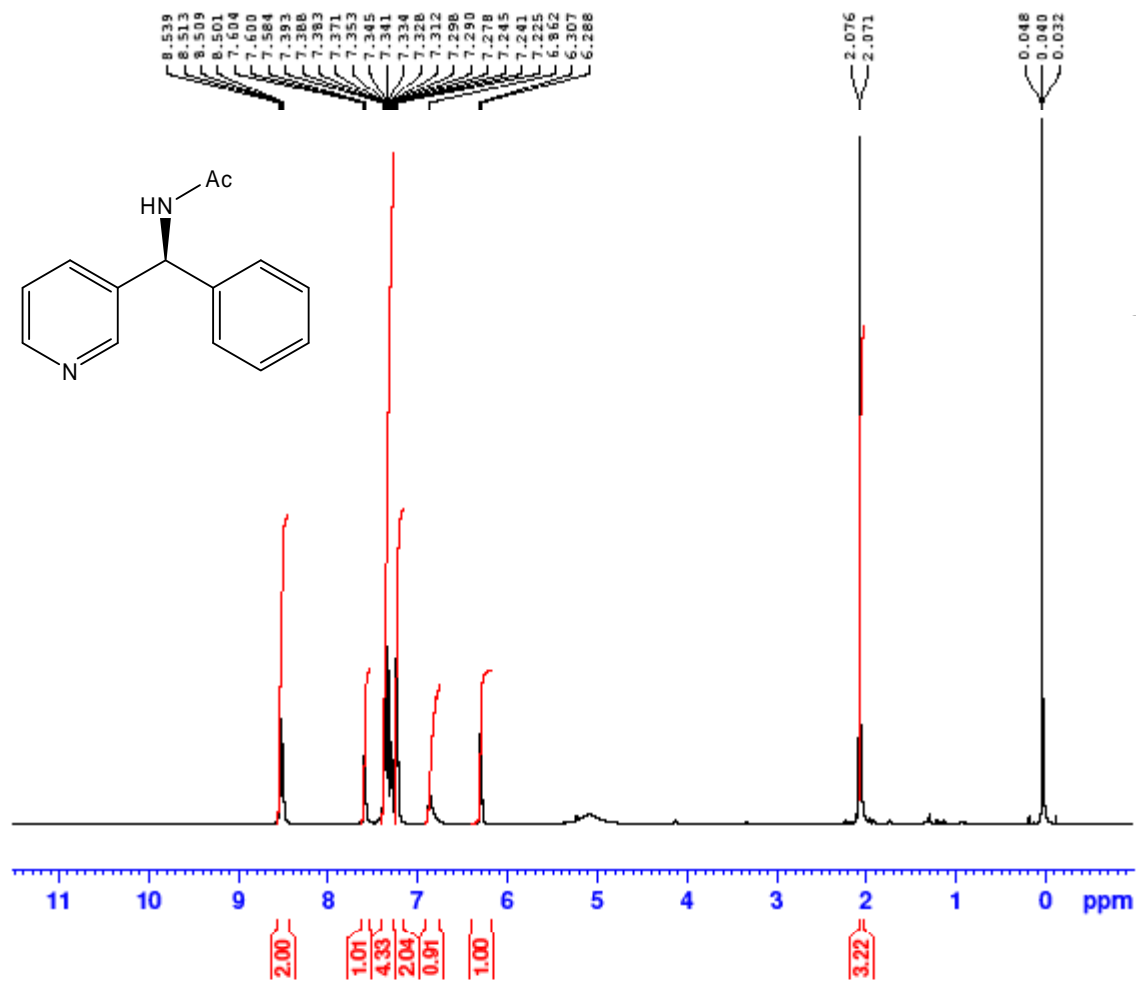

# (S)-phenyl(pyridin-3-yl)methanamine (31)

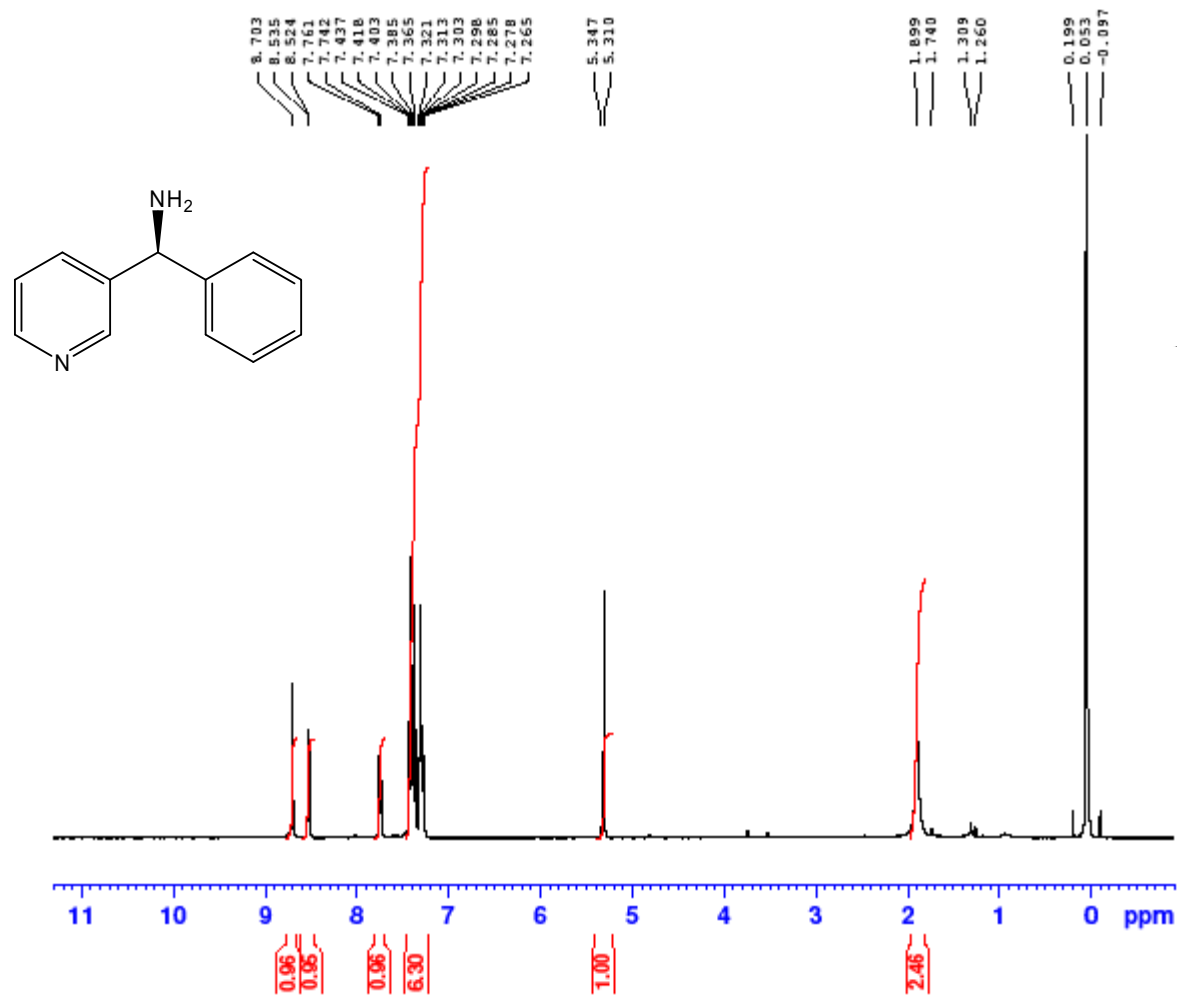

# (S)-phenyl(pyridin-3-yl)methanamine (31)

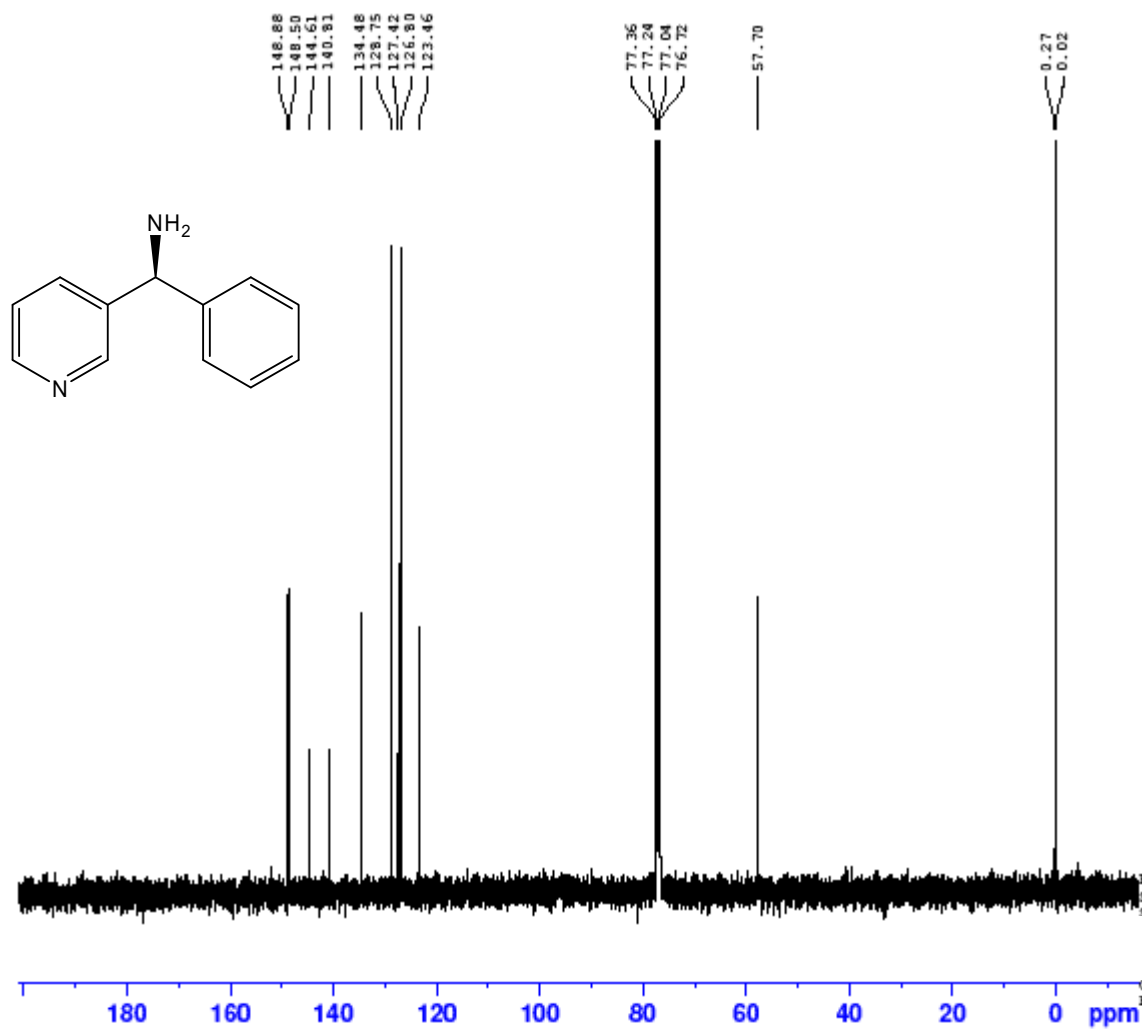

## (S)-phenyl(pyridin-3-yl)methanamine (31)

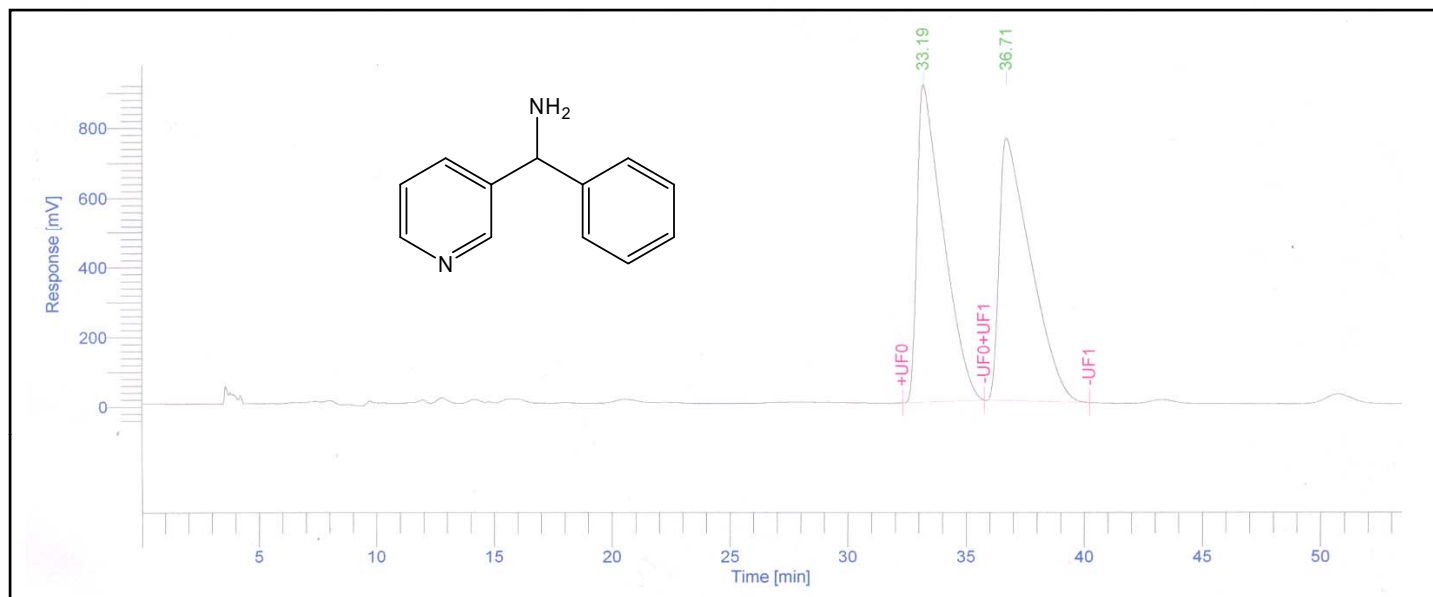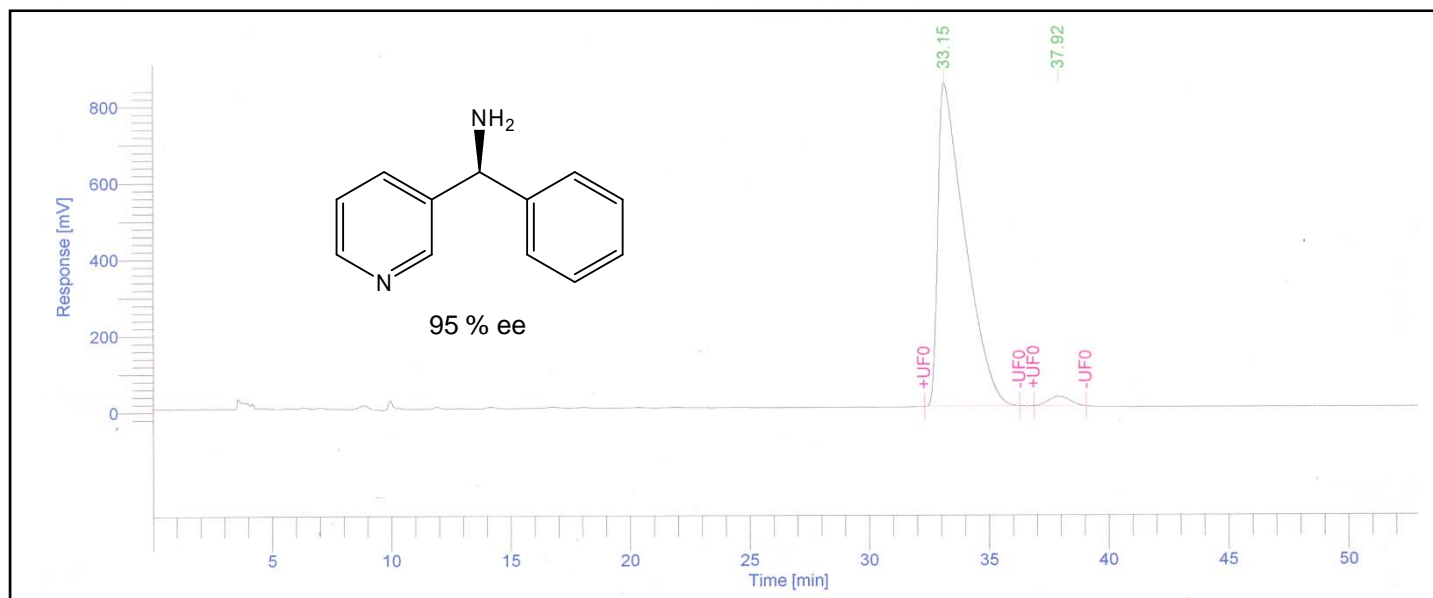

# N-1-(Pyridine-4-yl)-propyl-acetamide (32)

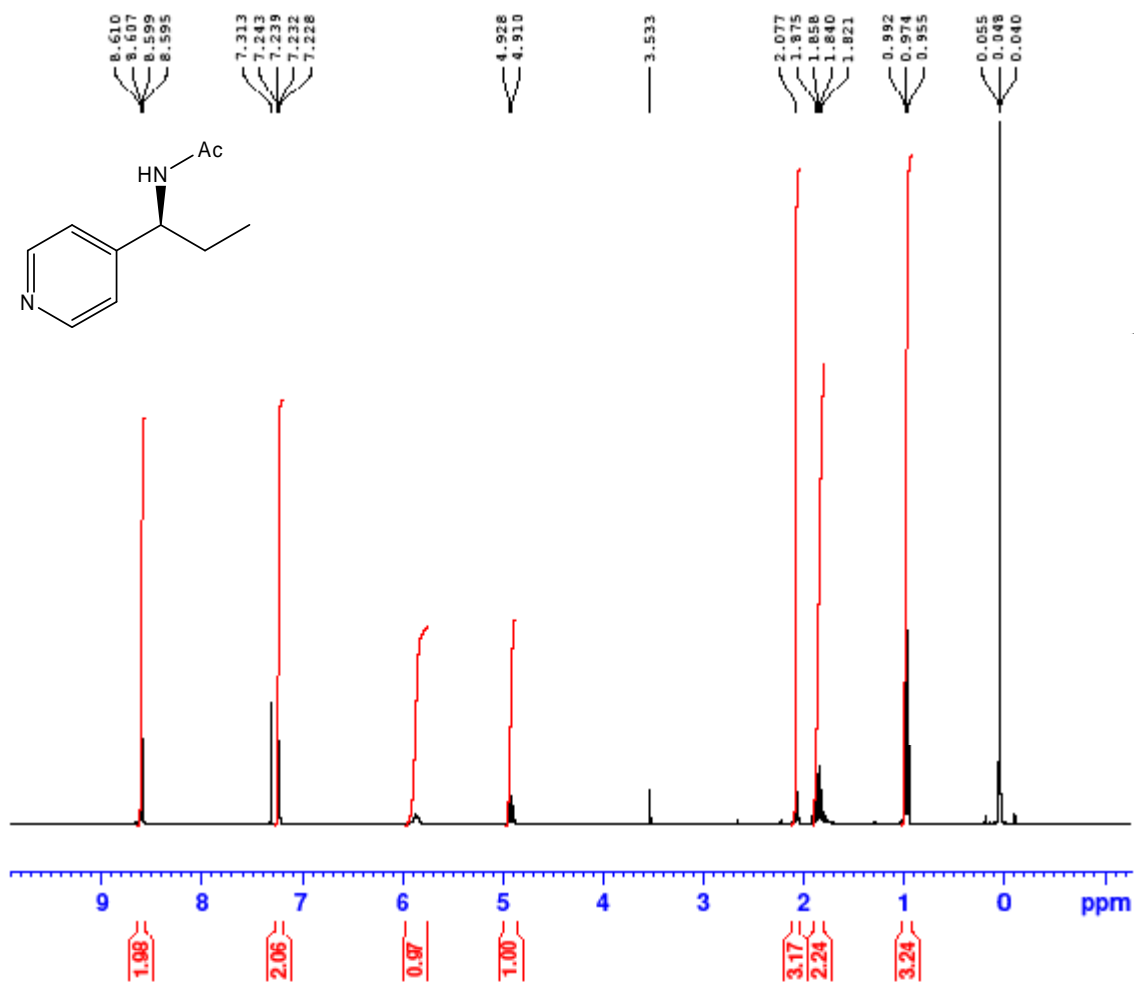

# ***N*-1-(Pyridine-4-yl)-propyl)-acetamide (32)**

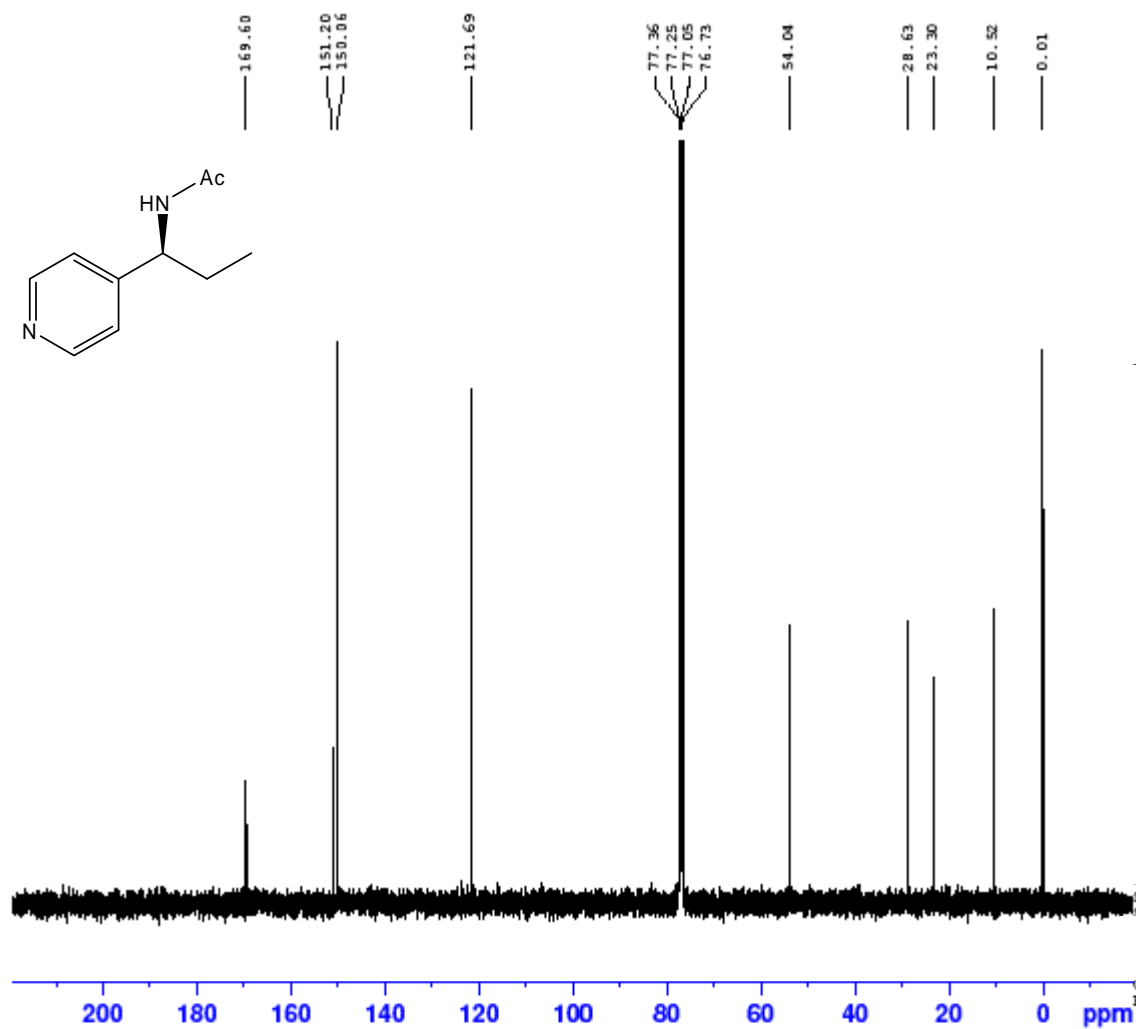



## N-1-(Pyridine-4-yl)-propyl-acetamide (32)

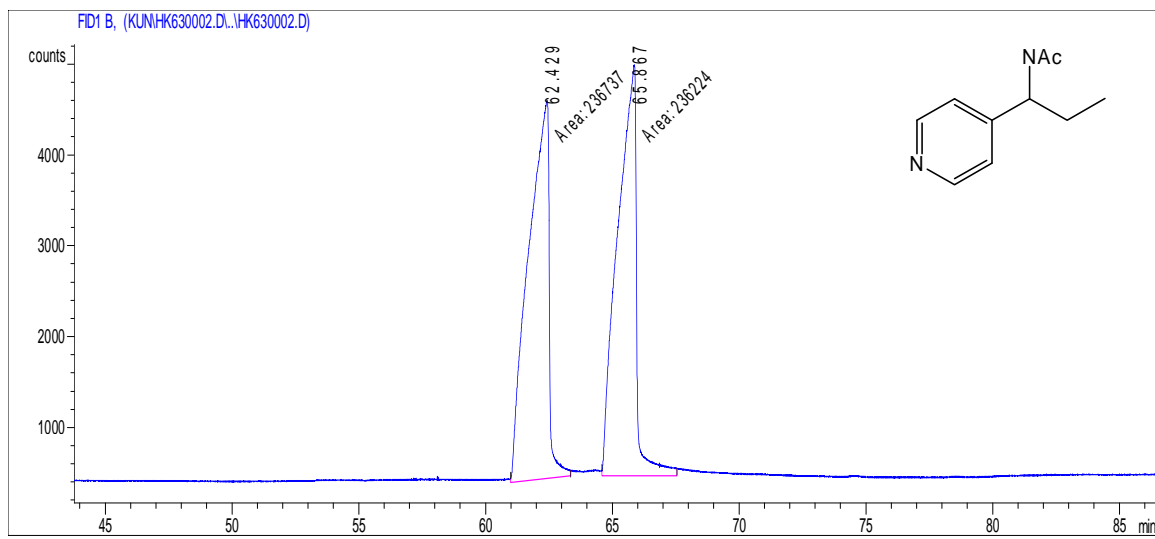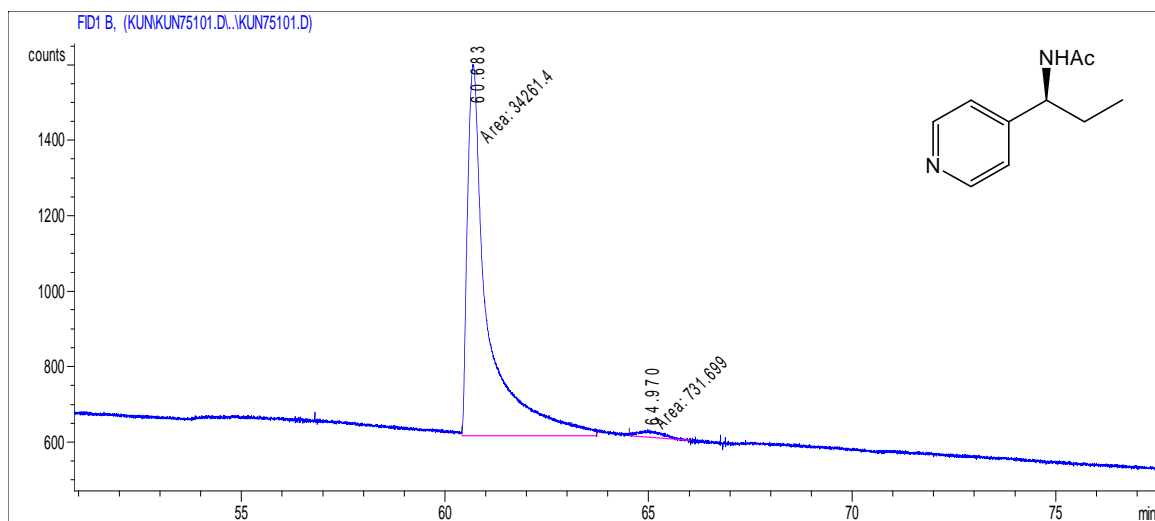

# N-Cyclopropyl-(pyridine-4-yl)-methyl-acetamide (33)

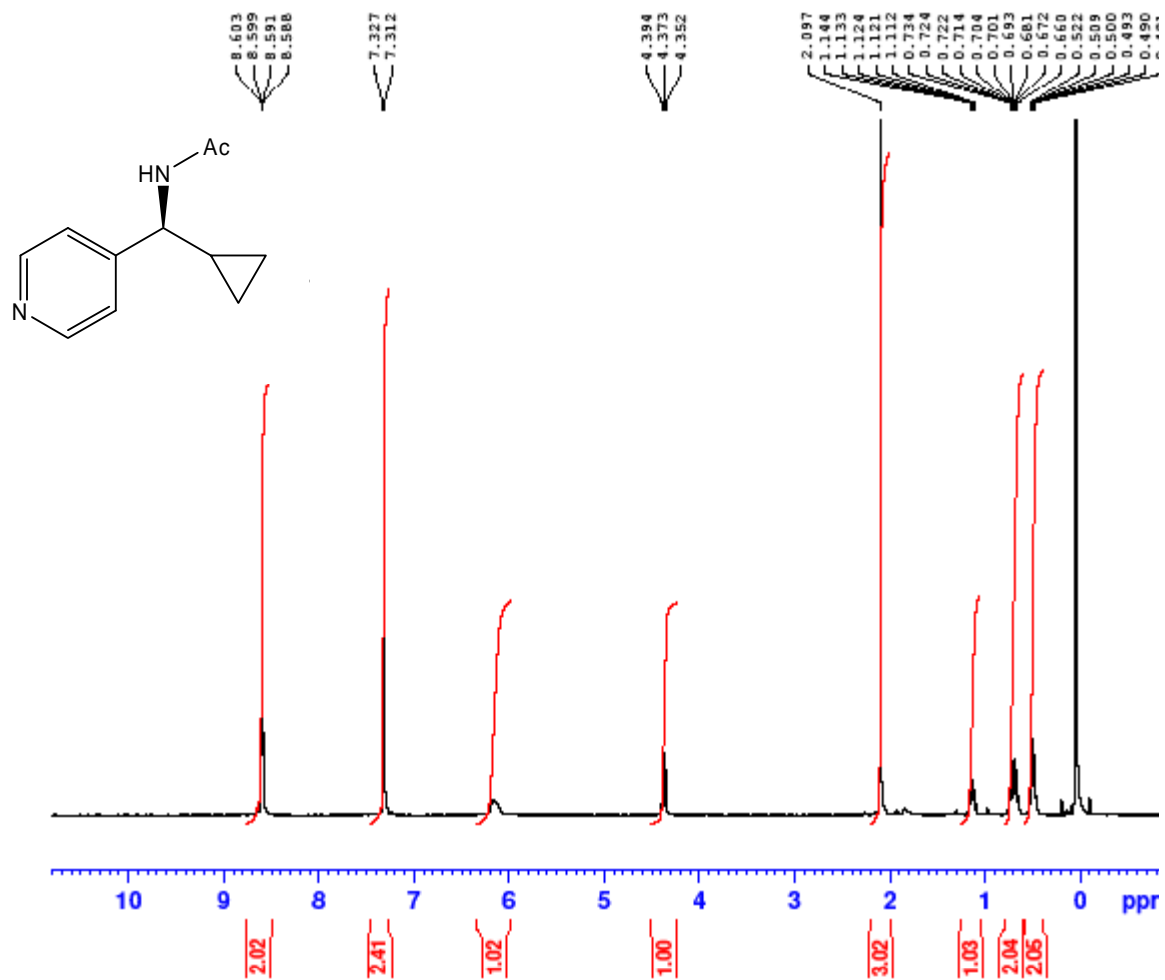

# N-Cyclopropyl-(pyridine-4-yl)-methyl-acetamide (33)

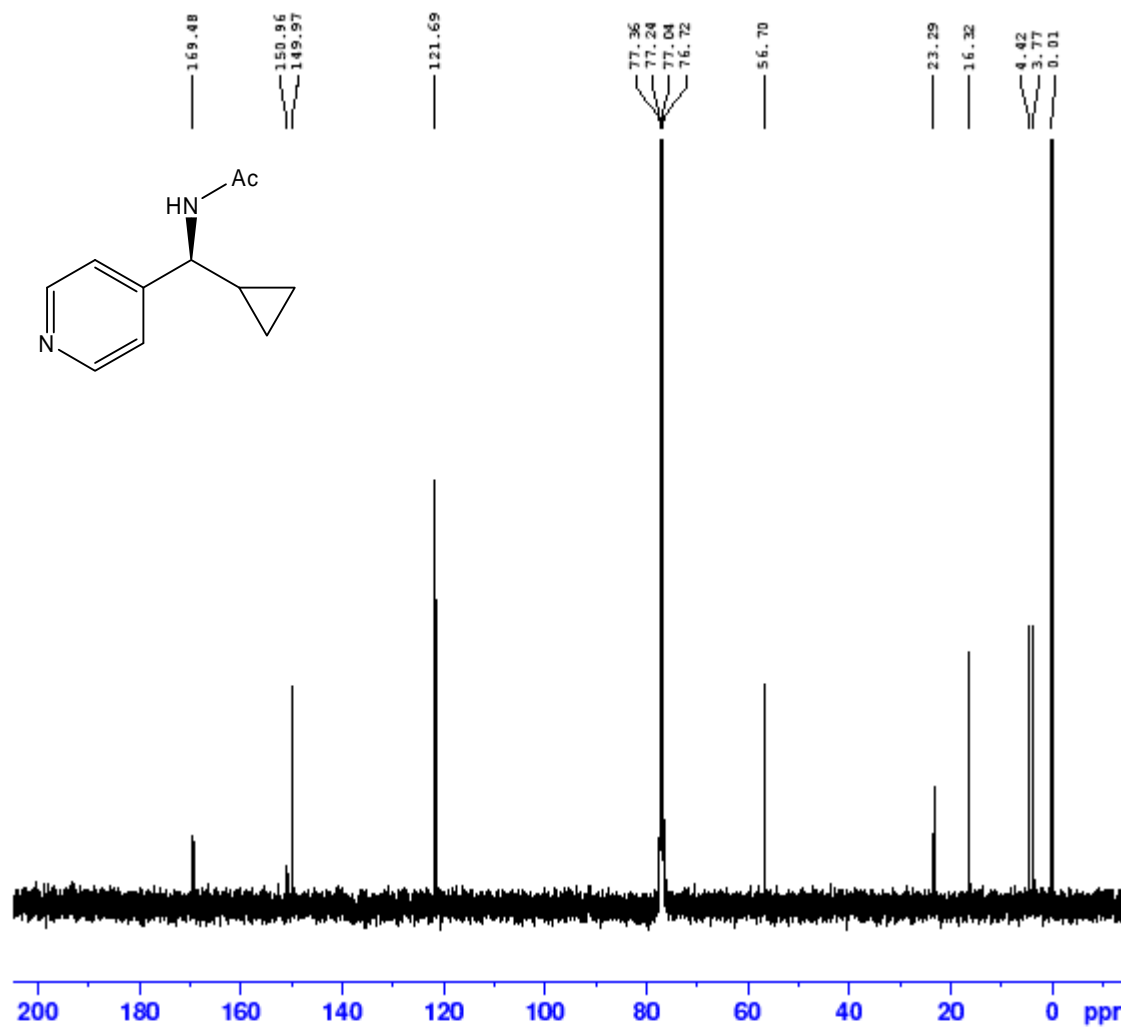

## N-Cyclopropyl-(pyridine-4-yl)-methyl-acetamide (33)

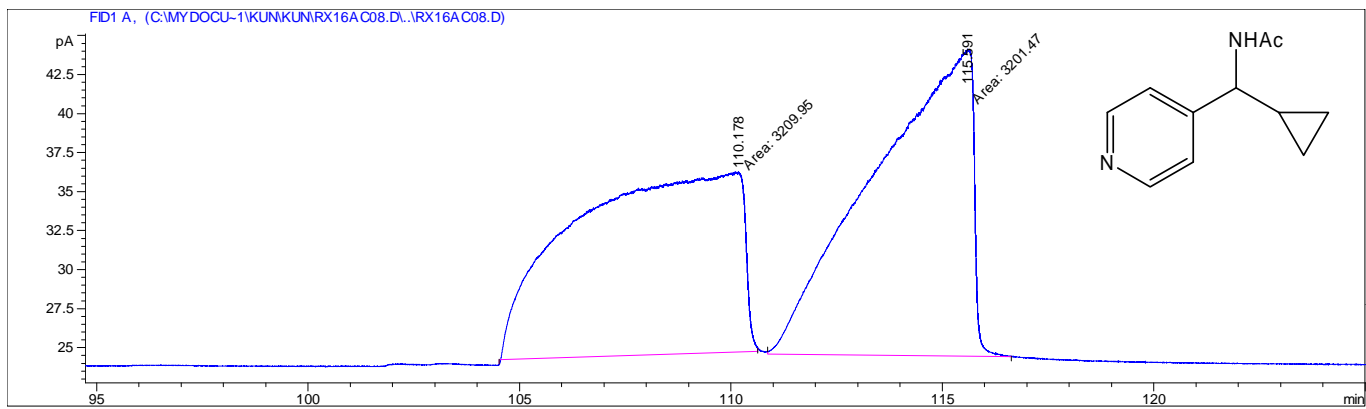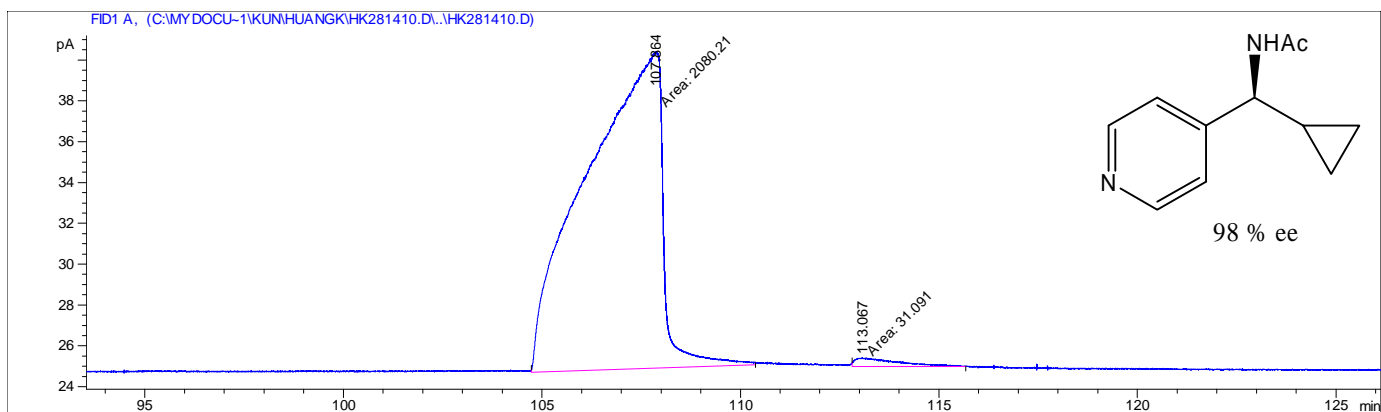

# 1-(pyridine-3-yl)-4-(triisopropylsilyloxy)butan-1-one

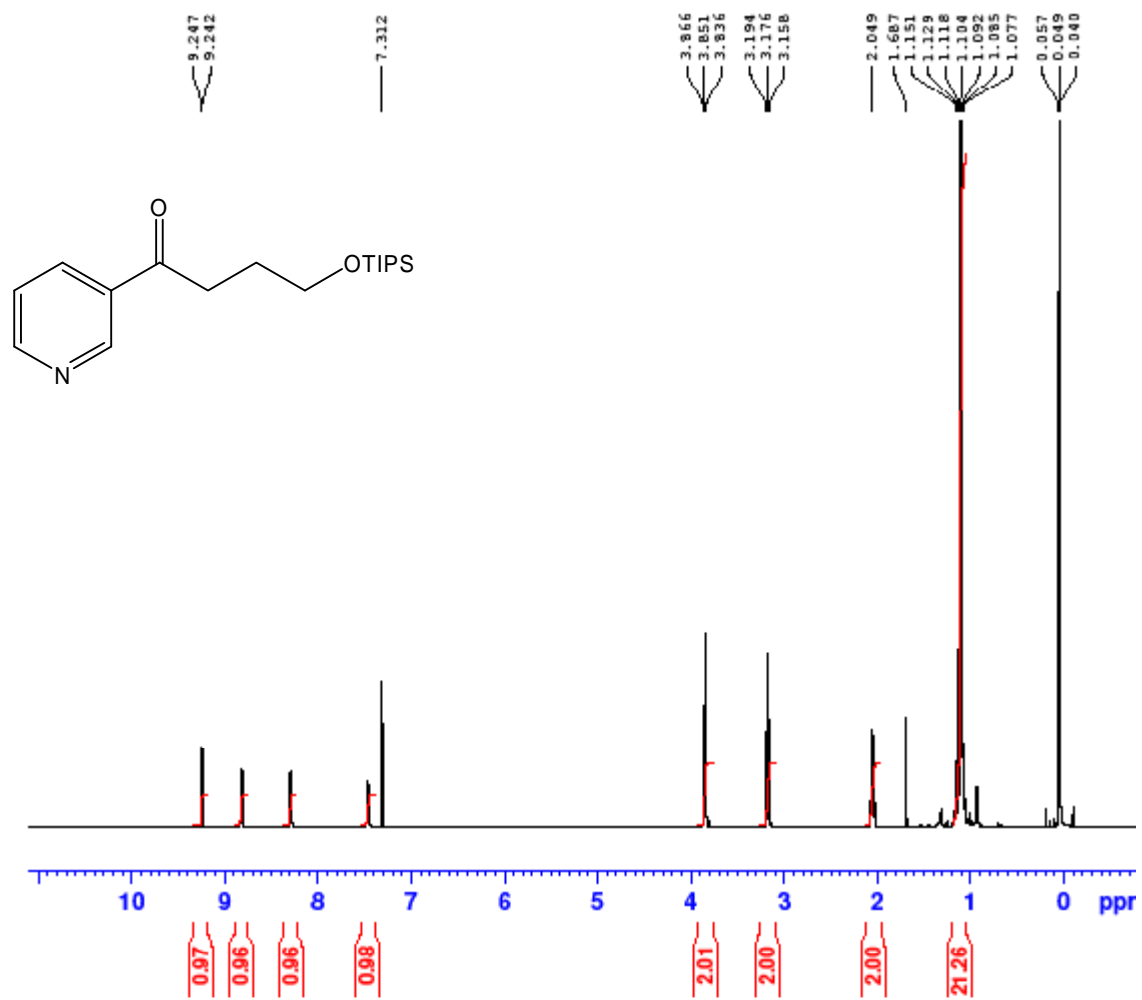

# 1-(pyridine-3-yl)-4-(triisopropylsilyloxy)butan-1-one

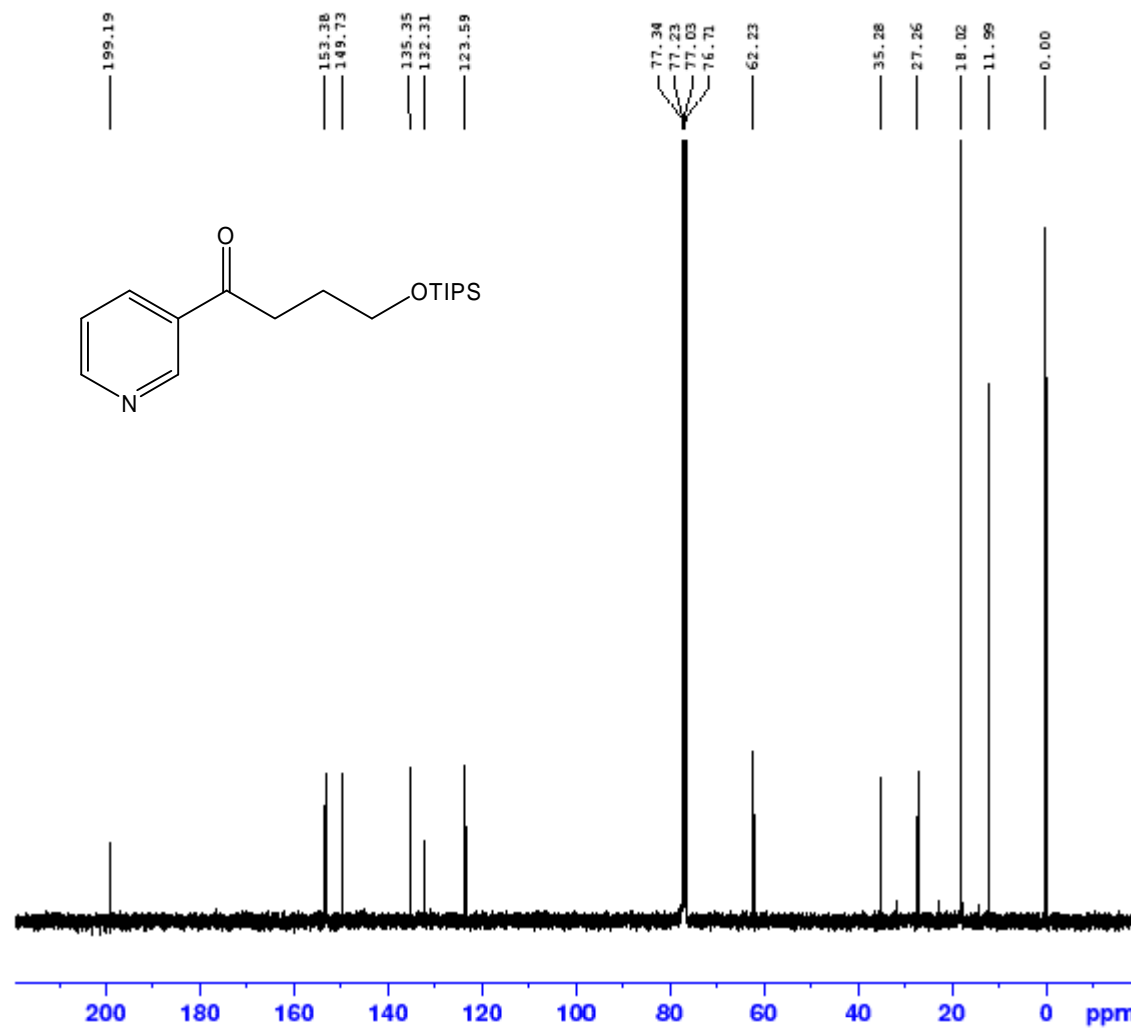



# *N*-(1-(Pyridine-3-yl)-4-(triisopropylsilyloxy)butyl)acetamide (34)

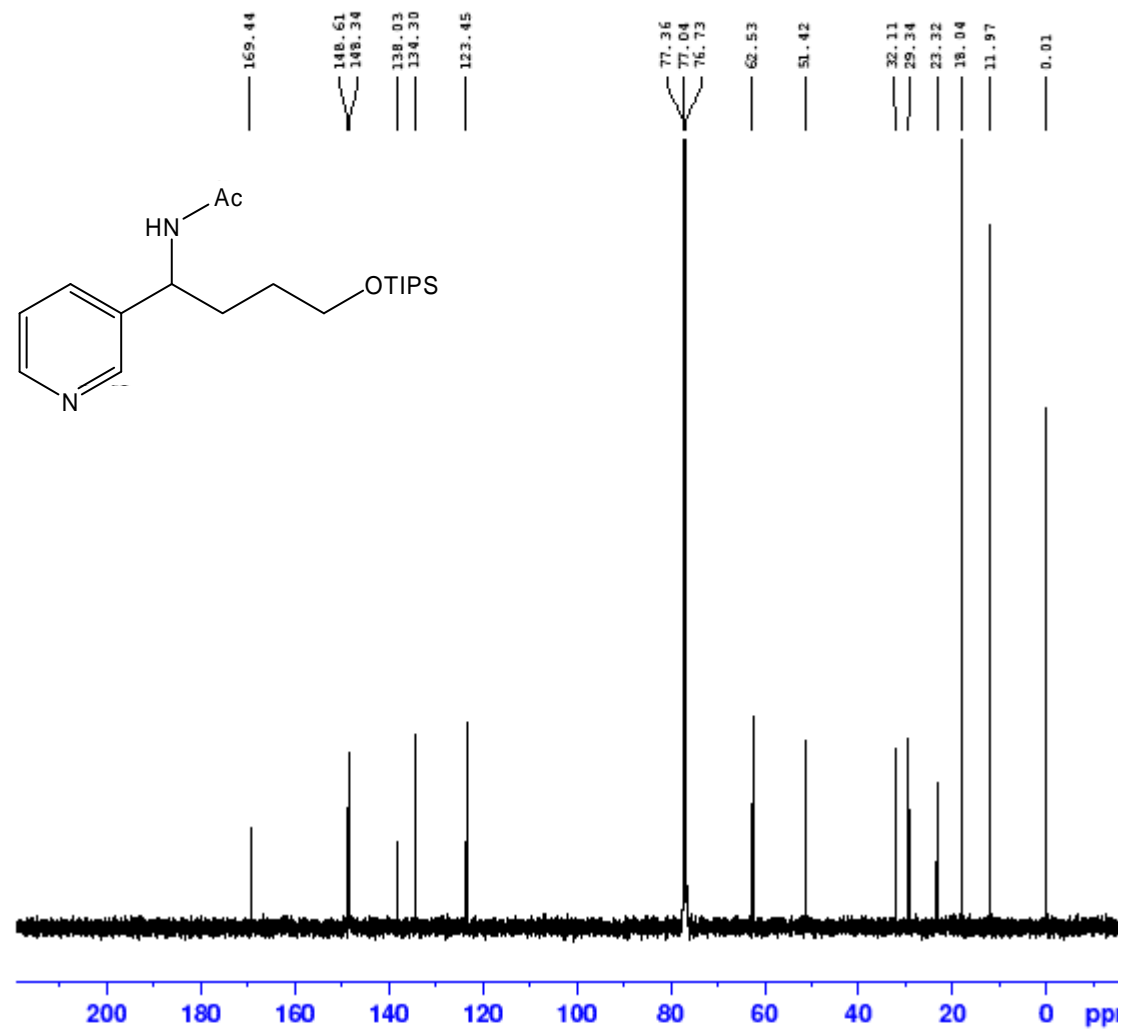



## ***N*-1-(Pyridine-3-yl)-4-(triisopropylsilyloxy)butyl)acetamide (34)**

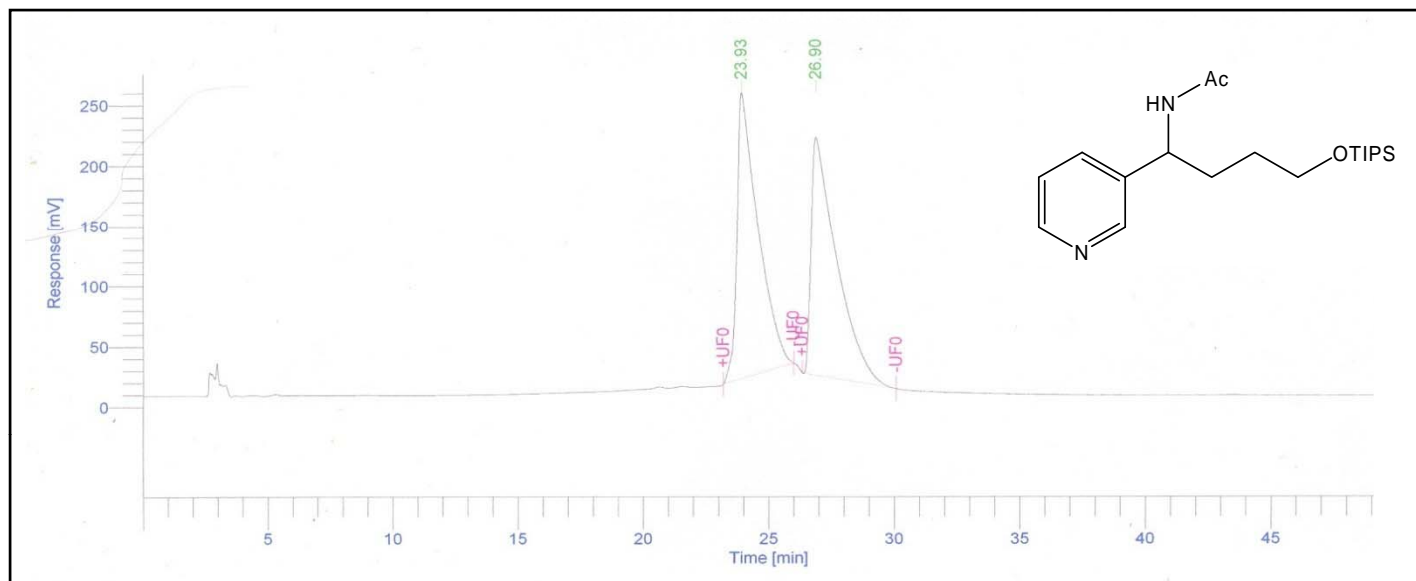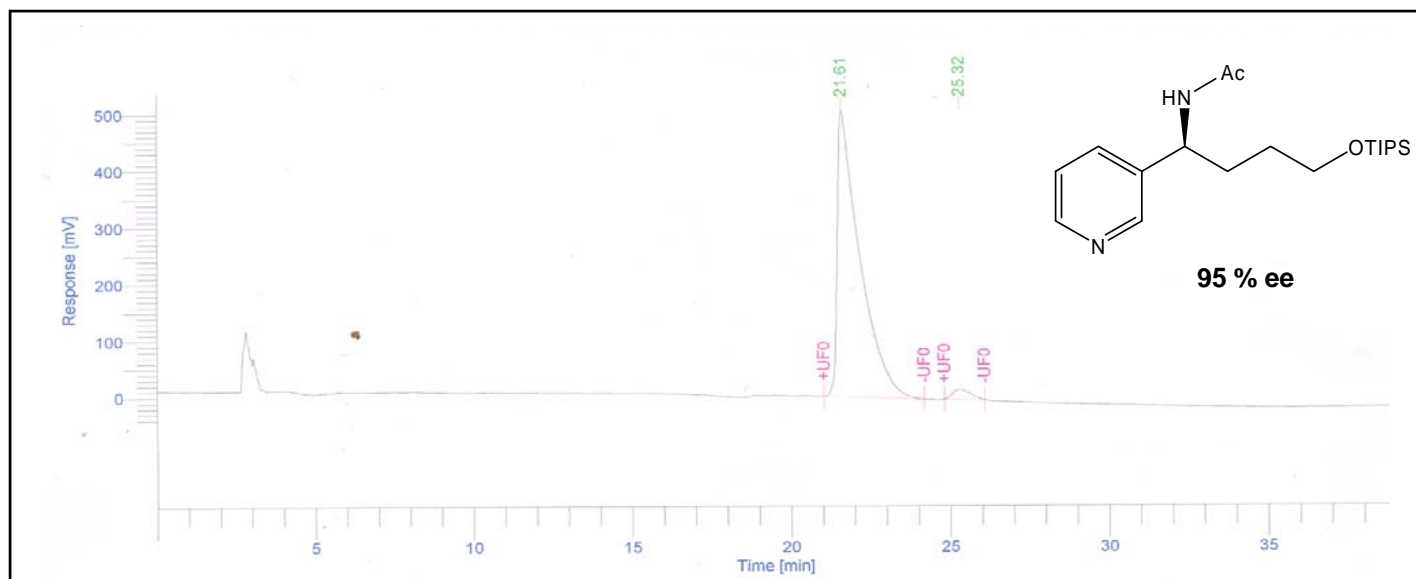



# (S)-4-amino-4-(pyridin-3-yl)butan-1-ol (36)

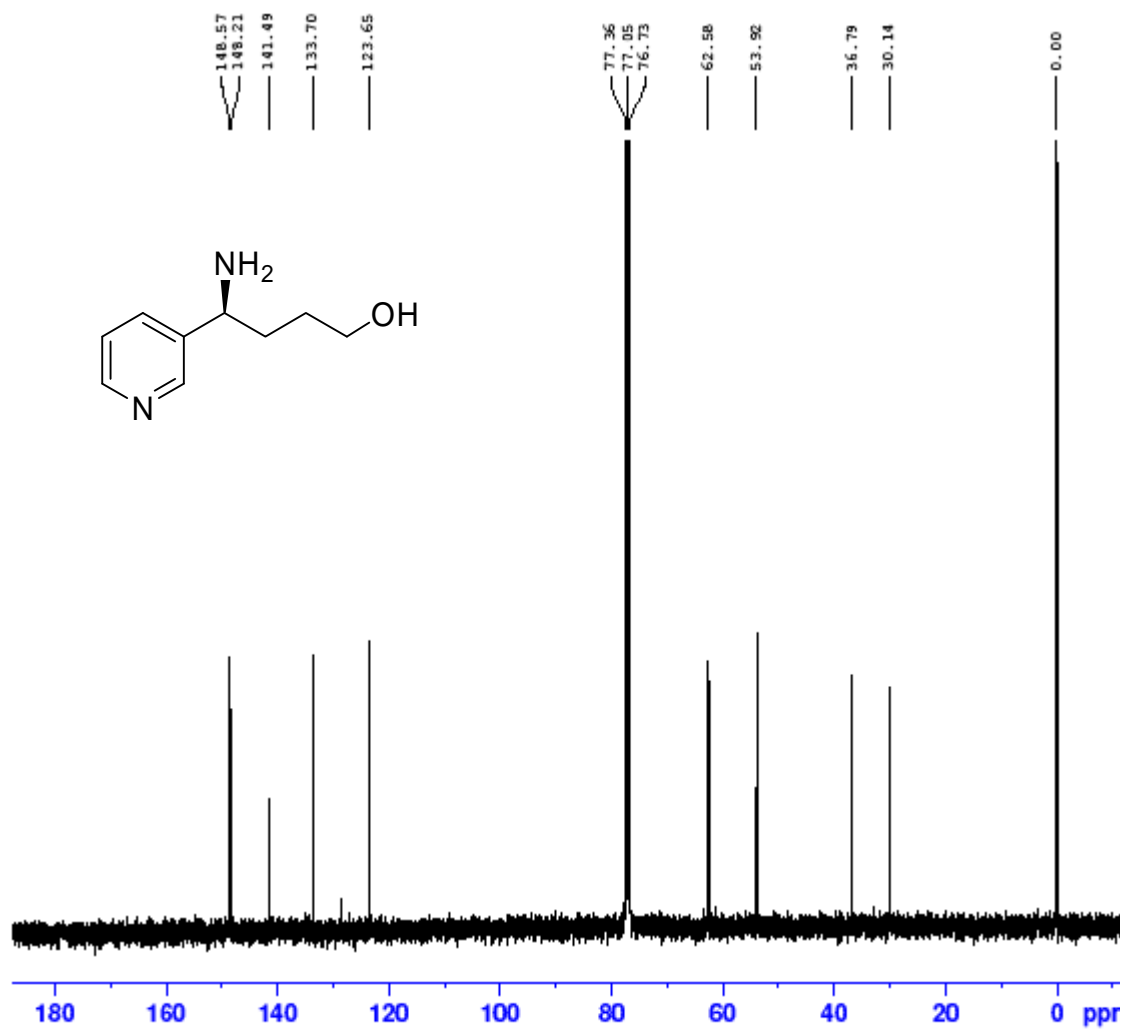

**(S)-N-(4-hydroxy-1-(pyridin-3-yl)butyl)acetamide (37)**

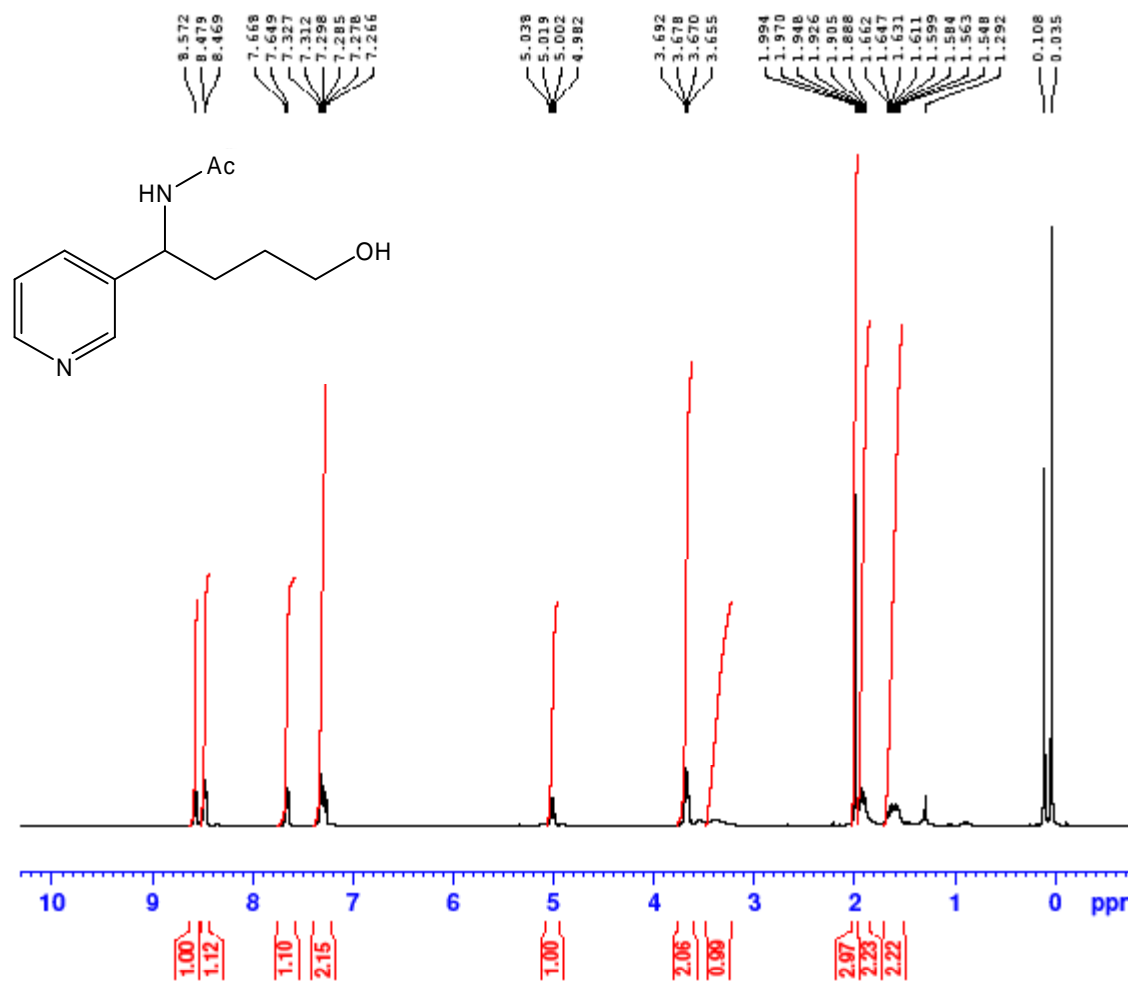

**(S)-N-(4-hydroxy-1-(pyridin-3-yl)butyl)acetamide (37)**

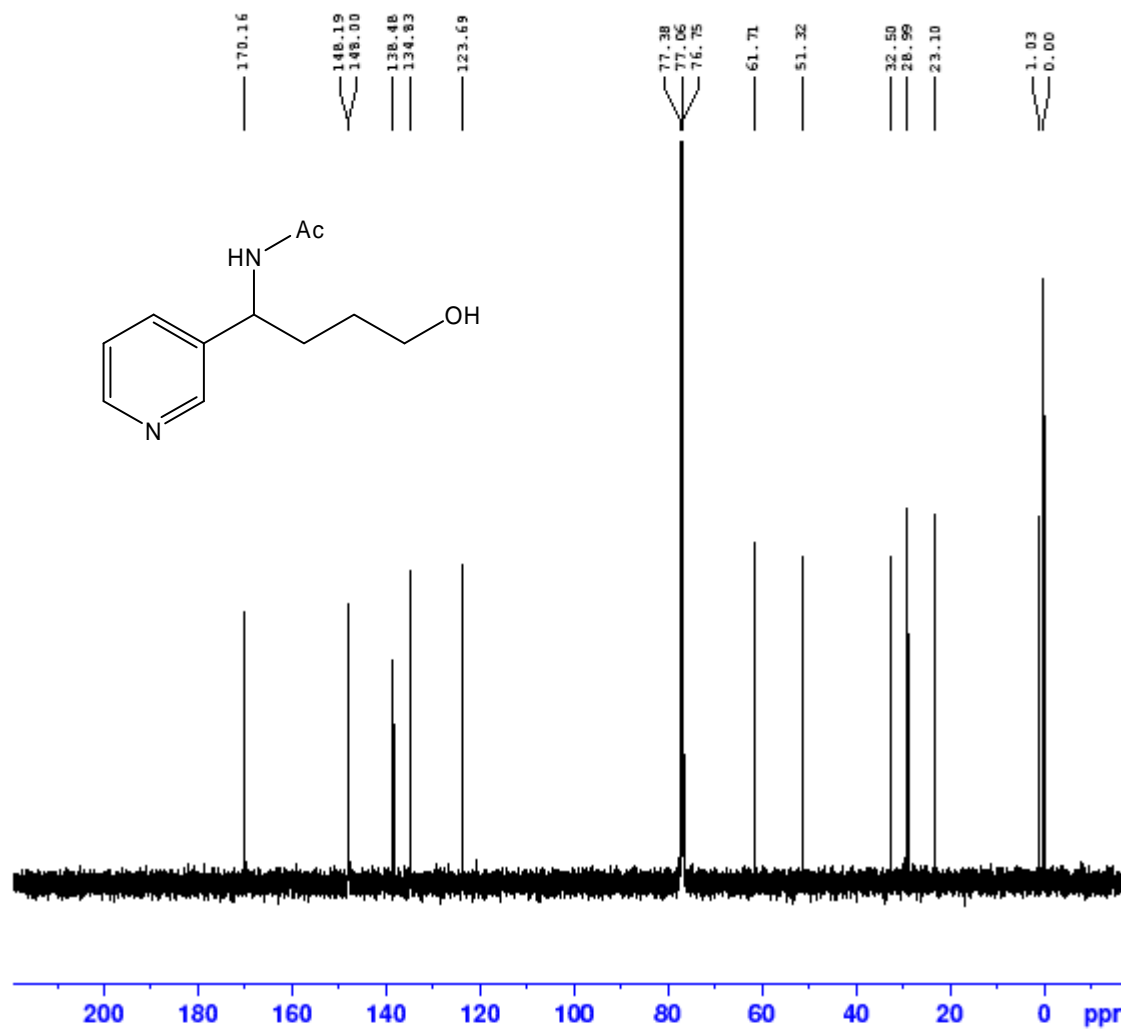

**(S)-4-(N-Ethylamino)-4-(pyridin-3-yl)butan-1-ol (38)**

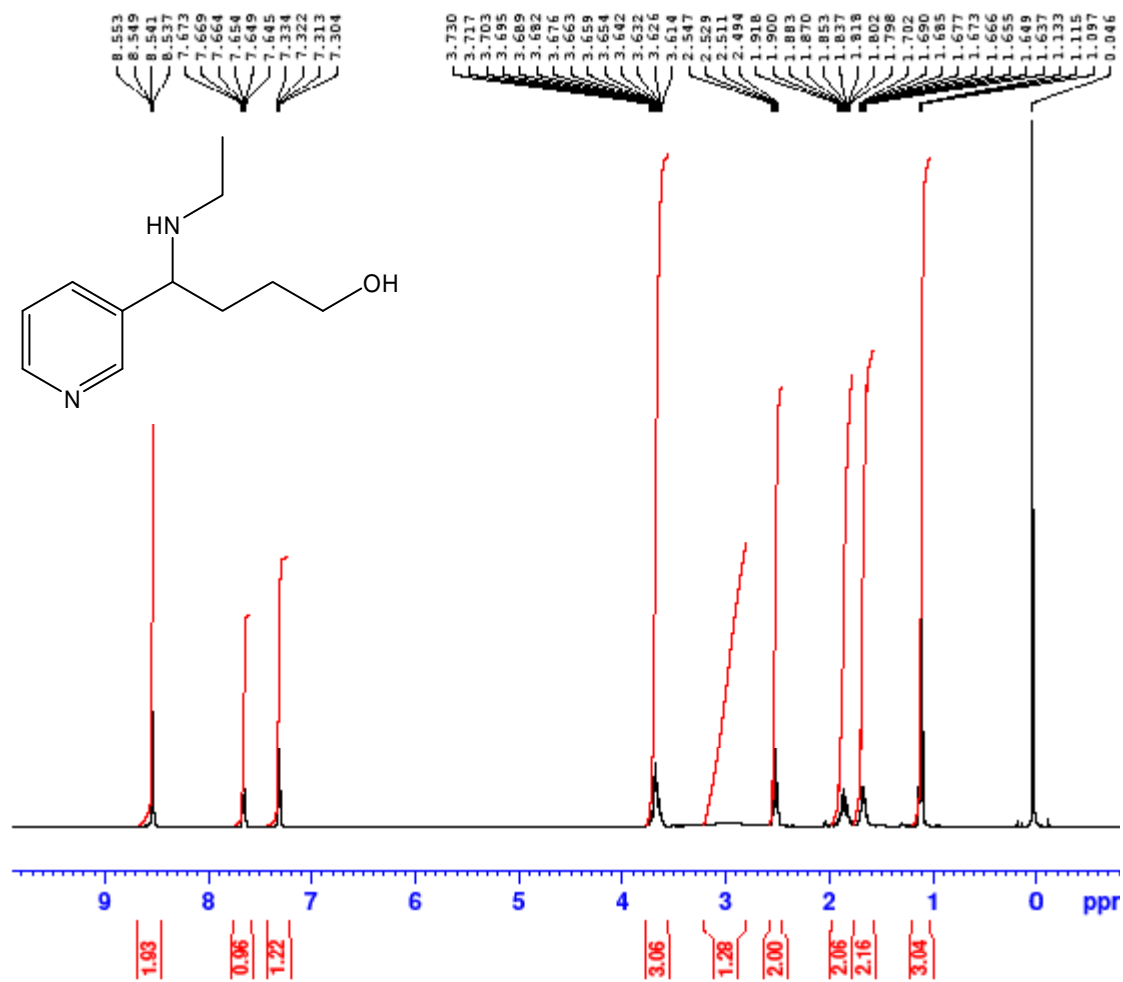

**(S)-4-(N-Ethylamino)-4-(pyridin-3-yl)butan-1-ol (38)**

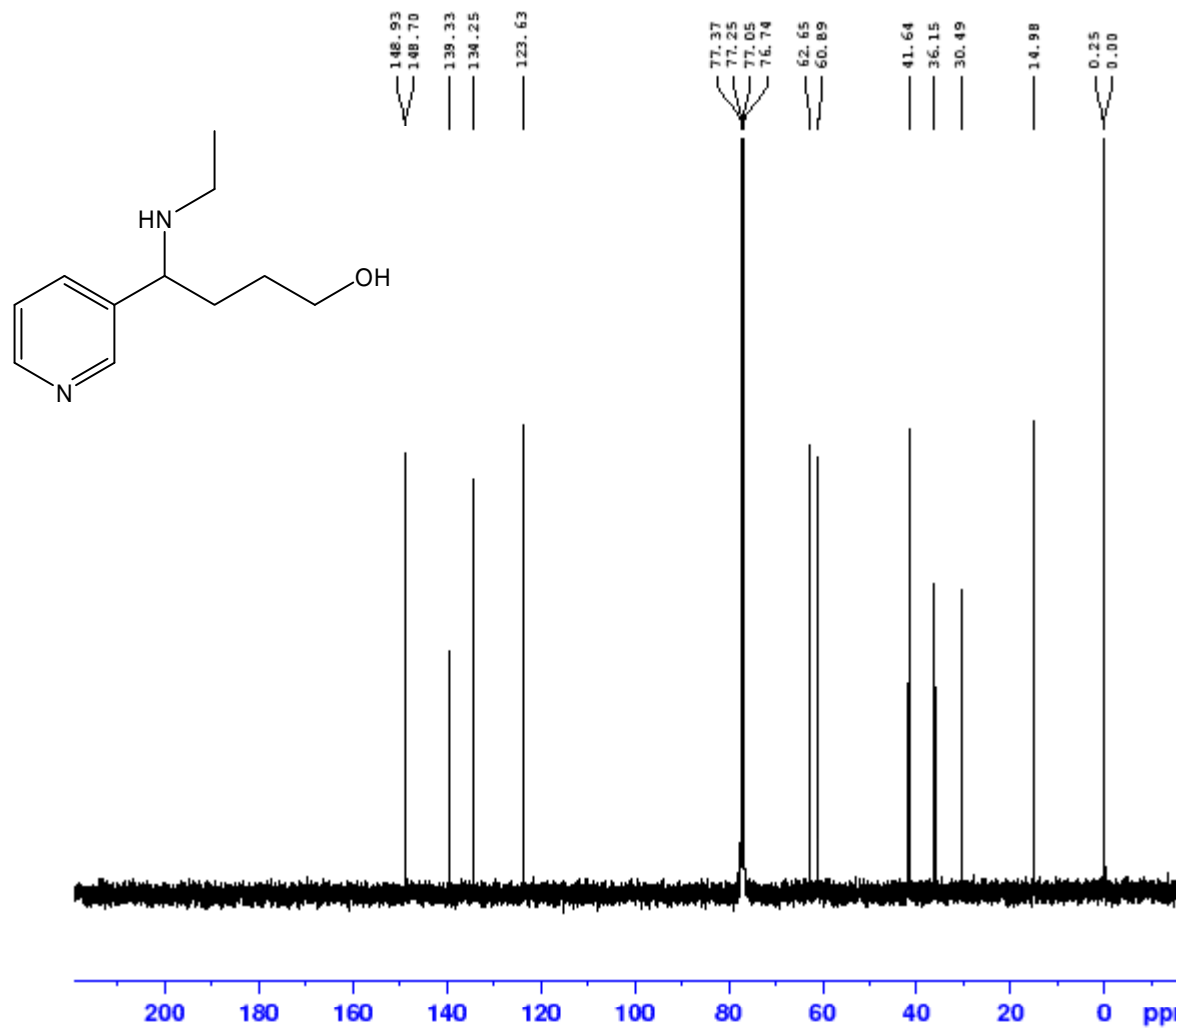

# (S)-1-(3-pyridyl)ethylamine (21a)

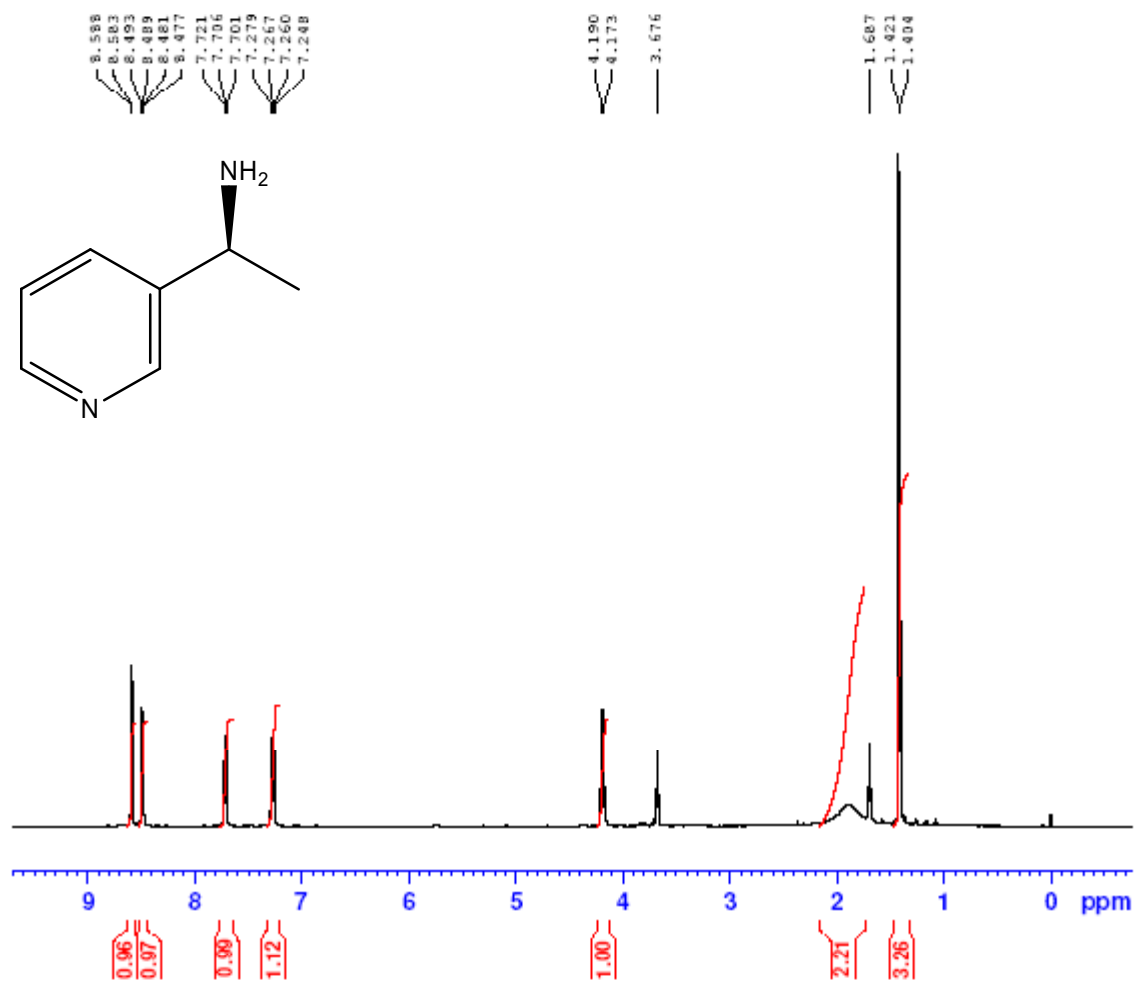



# (S)-1-(3-pyridyl)ethylamine (21a)

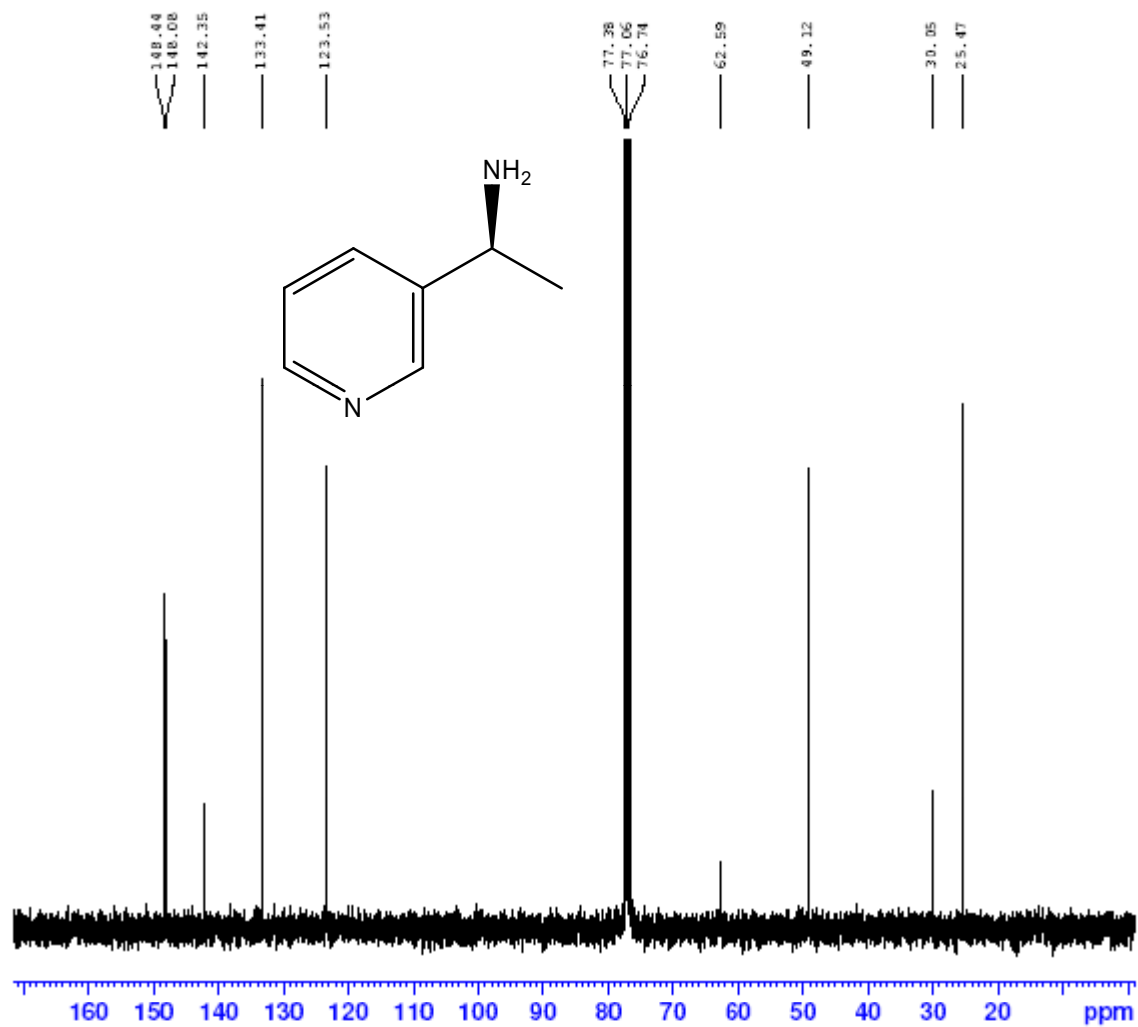

# (S)-1-(4-pyridyl)ethylamine (23a)

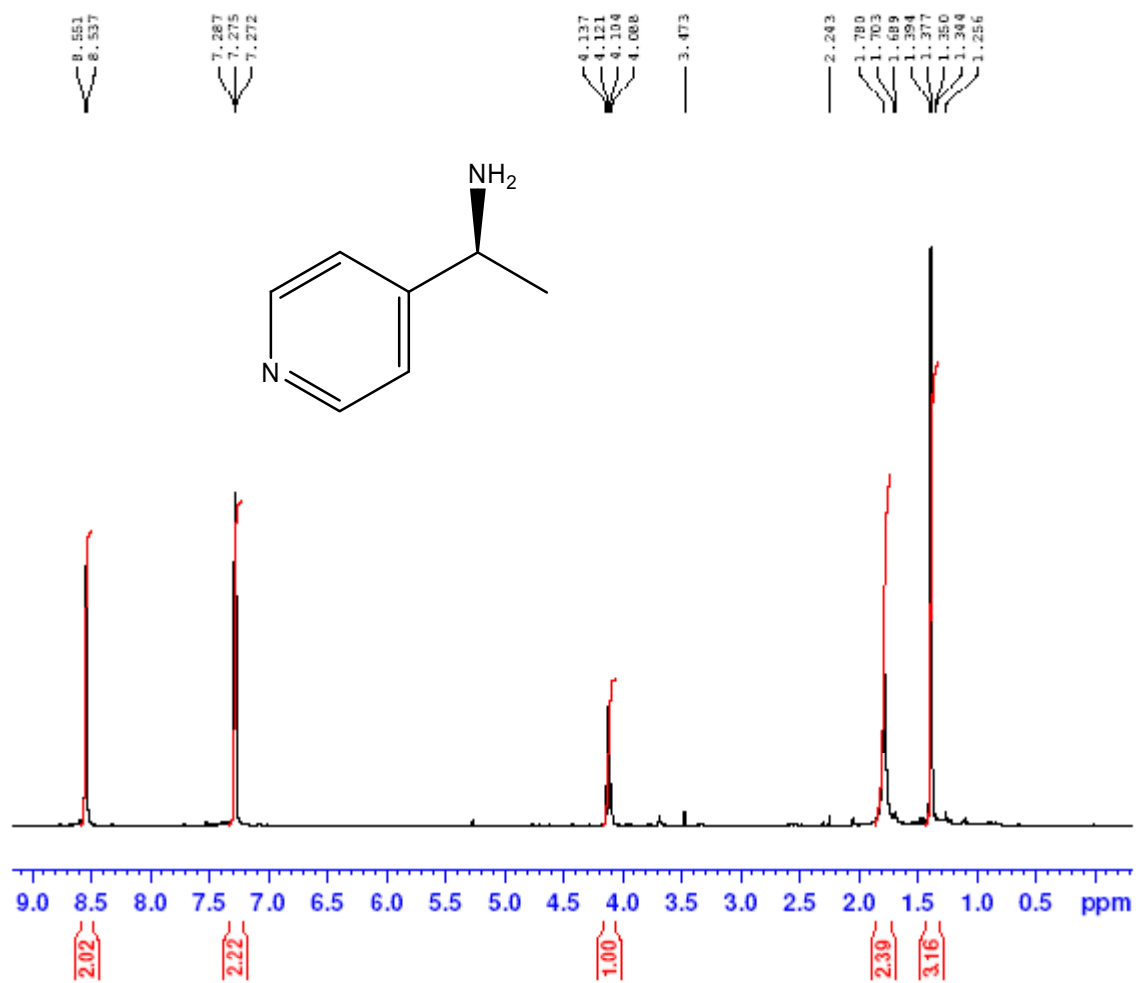

**(S)-1-(4-pyridyl)ethanamine (23a)**

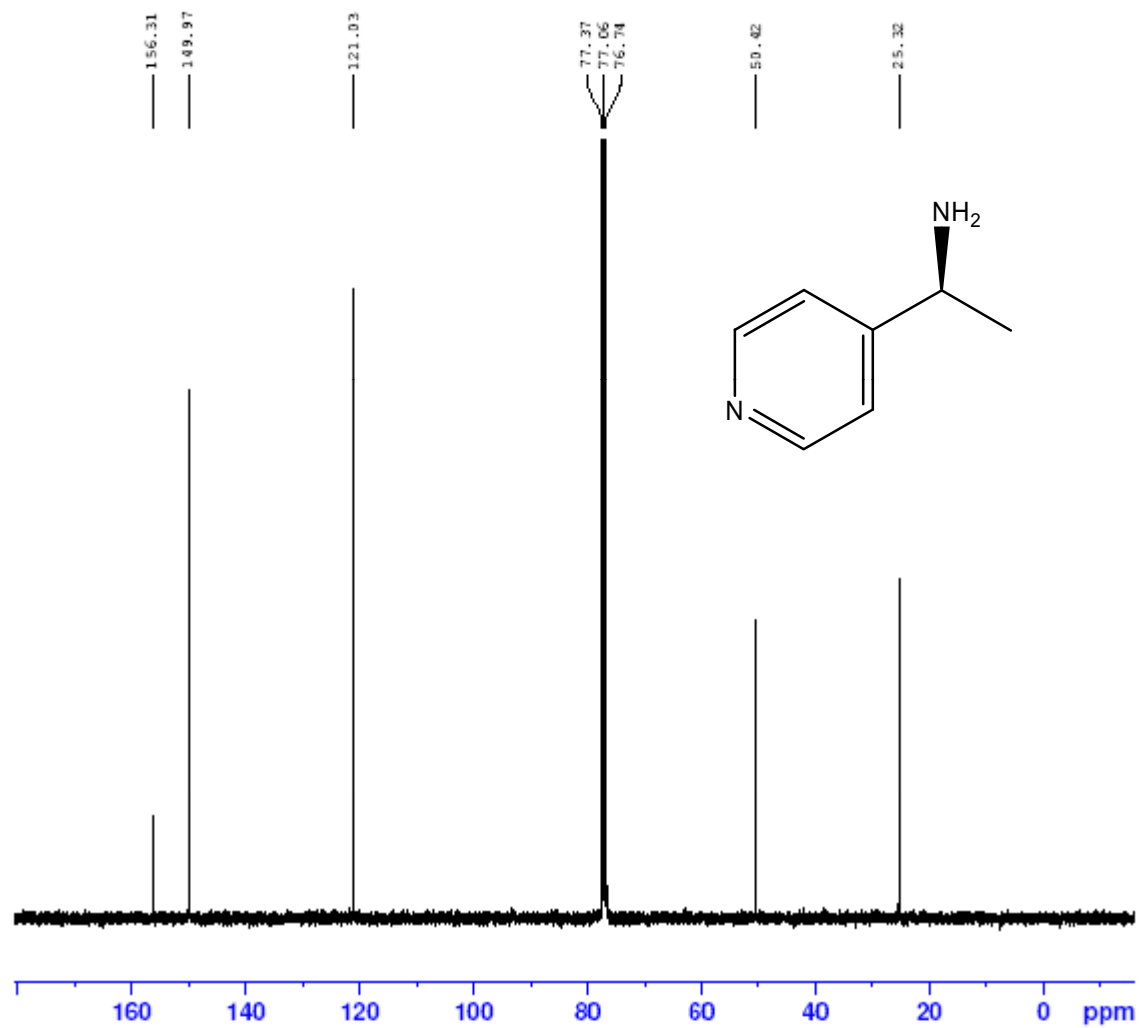

Supplement: NIHMS100434-supplement-Experimental.pdf [file NIHMS100434-supplement-Experimental.pdf]
